# Supplementary material
Source: Research Square preprint supplement (doi:10.21203/rs.3.rs-8967608/v1)

**Comparative proteomic analysis of saliva and salivary stones in sialolithiasis**

**Natalia Musiał1*, Inez Mruk1, Dmitry Tretiakow2, Andrzej Skorek2, Konrad Szydłowski2, Jan Szlęzak2, Bogusław Mikaszewski3, Paulina Czaplewska1***

Inez Mruk, [inez.mruk@phdstud.ug.edu.pl](mailto:inez.mruk@phdstud.ug.edu.pl), ORCiD: 0000-0001-8612-7675;

Dmitry Tretiakow, [d.tret@gumed.edu.pl](mailto:d.tret@gumed.edu.pl), ORCiD: 0000-0001-9251-4006;

Andrzej Skorek, [askorek@copernicus.gda.pl](mailto:askorek@copernicus.gda.pl);

Konrad Szydłowski, [konrad.szyd@gmail.com](mailto:konrad.szyd@gmail.com), ORCiD: 0009-0005-7203-7704;

Jan Szlęzak, [jszlezak@copernicus.gda.pl](mailto:jszlezak@copernicus.gda.pl).

Bogusław Mikaszewski, [boguslaw.mikaszewski@gumed.edu.pl](mailto:boguslaw.mikaszewski@gumed.edu.pl).

1. Laboratory of Mass Spectroscopy, Intercollegiate Faculty of Biotechnology, University of Gdansk, Abrahama 58, 80-307 Gdansk, Poland;
2. Clinical Department of Otolaryngology, Academy of Applied Medical and Social Sciences, The Nicolaus Copernicus Hospital in Gdansk, Copernicus Healthcare Entity, Powstańców Warszawskich 1/2, 80-152 Gdansk, Poland.
3. Department of Otolaryngology, Faculty of Medicine, Medical University of Gdańsk, Smoluchowskiego 17, 80-214 Gdańsk, Poland.

***Corresponding authors:** Dr Paulina Czaplewska, [paulina.czaplewska@ug.edu.pl](mailto:paulina.czaplewska@ug.edu.pl), ORCiD: 0000-0002-6469-6014, and Natalia Musiał, [natalia.musial@phdstud.ug.edu.pl](mailto:natalia.musial@phdstud.ug.edu.pl), ORCiD: 0000-0001-9883-7965

**Figure S1.** The pictures of most of salivary stone samples.


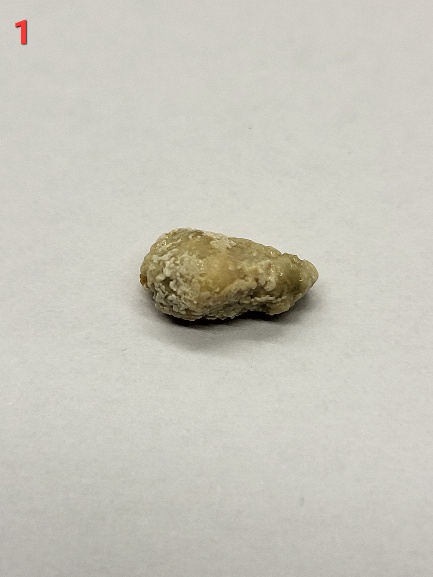

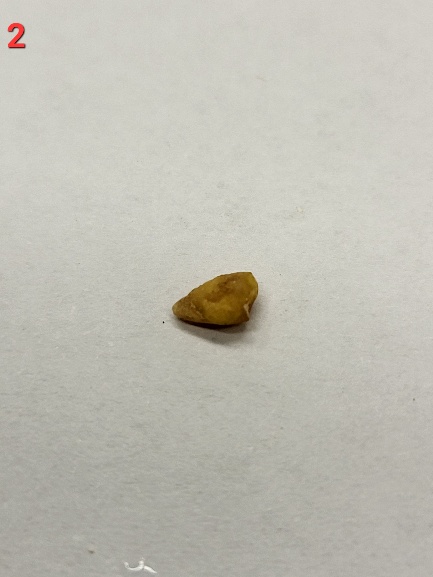

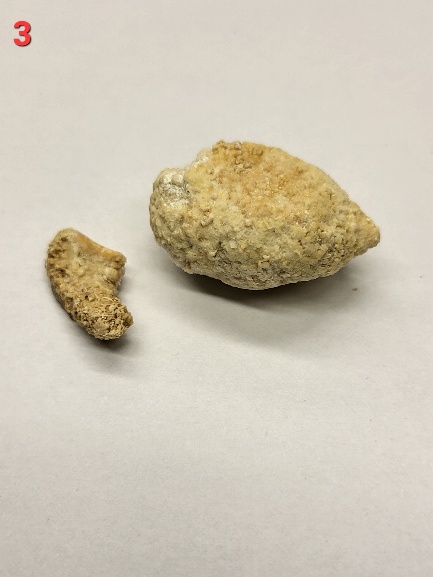


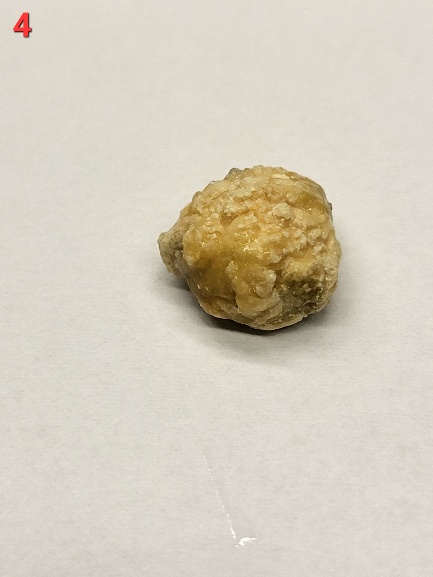

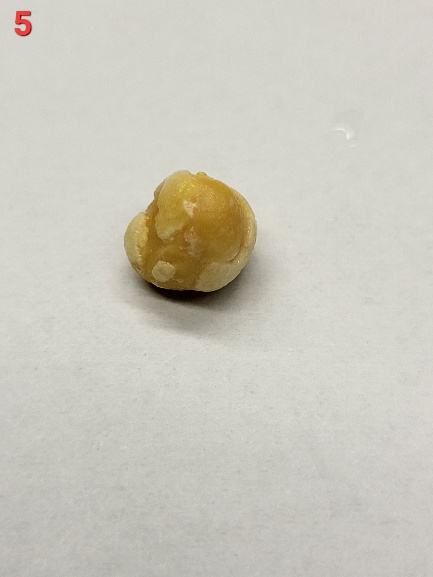

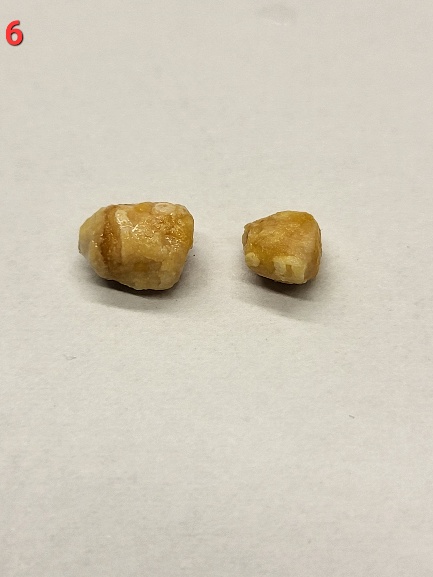


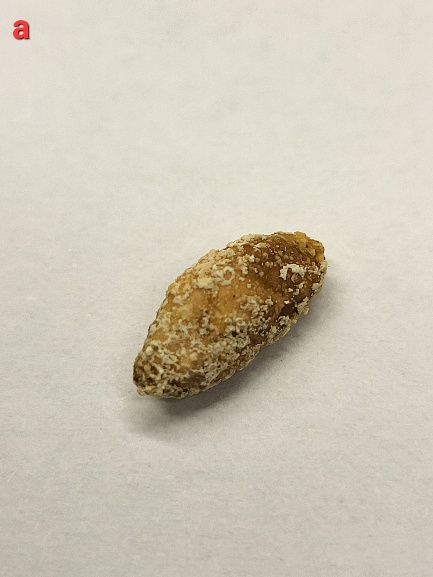

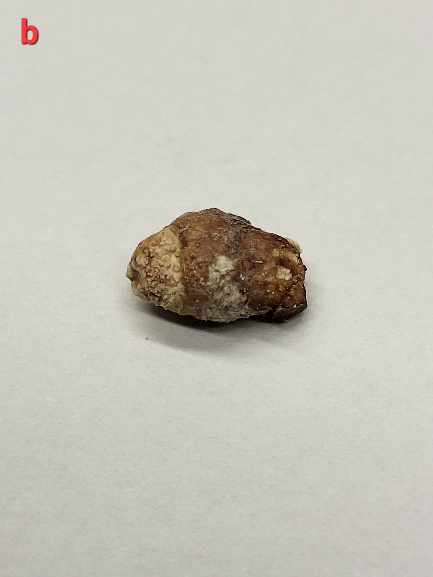

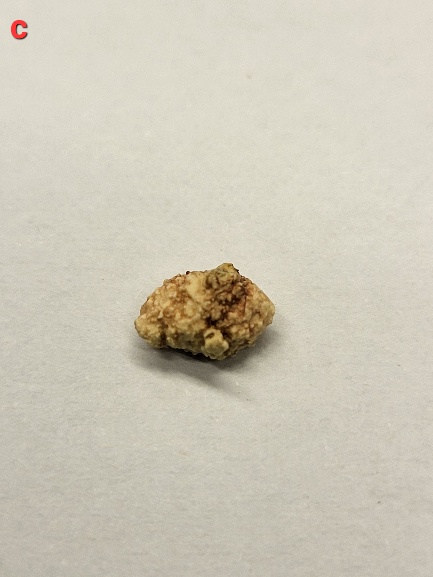


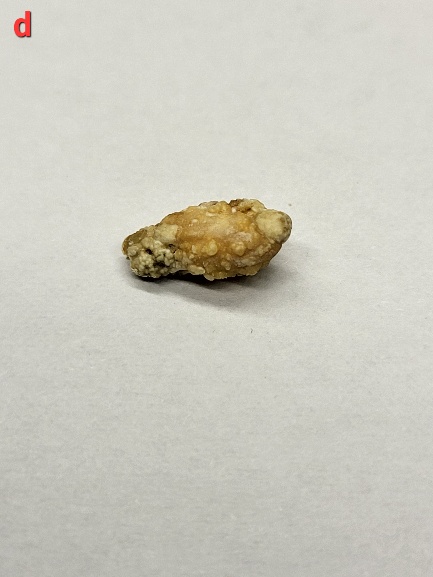

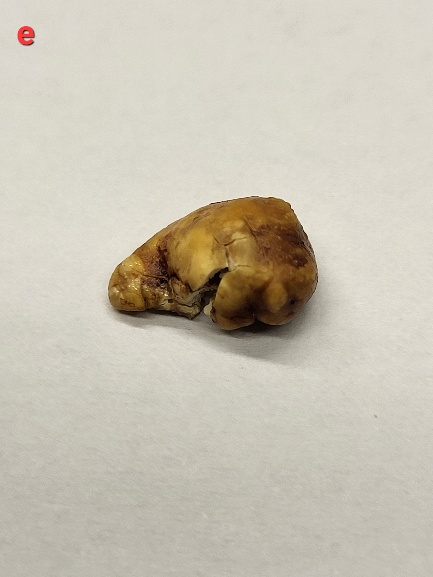

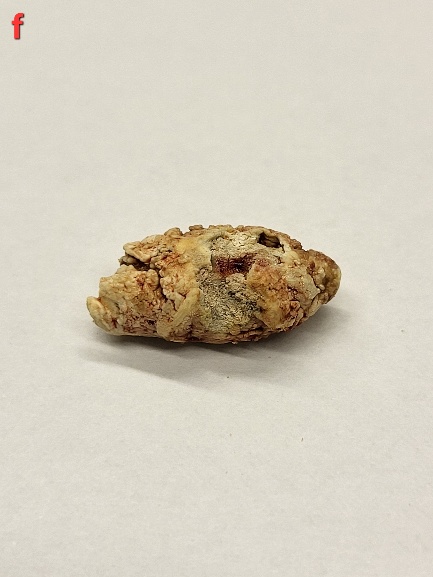


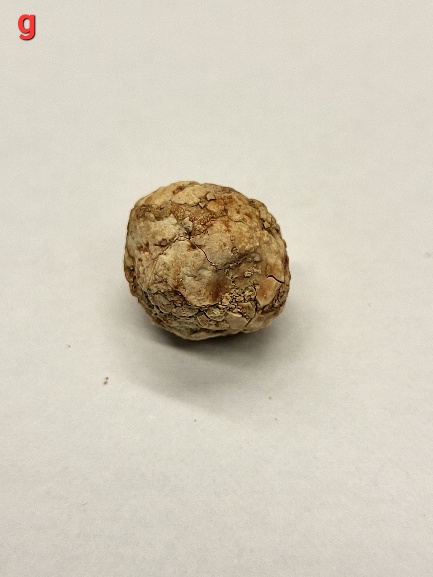

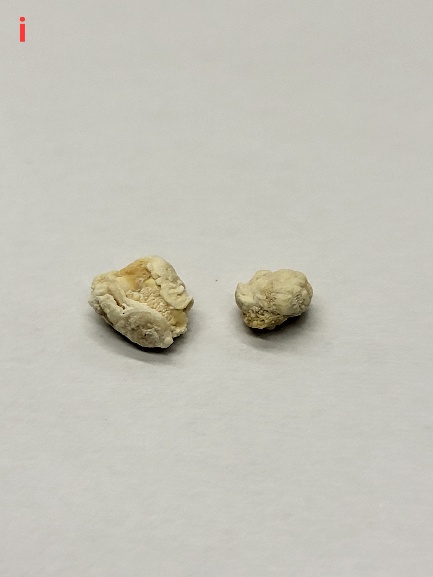

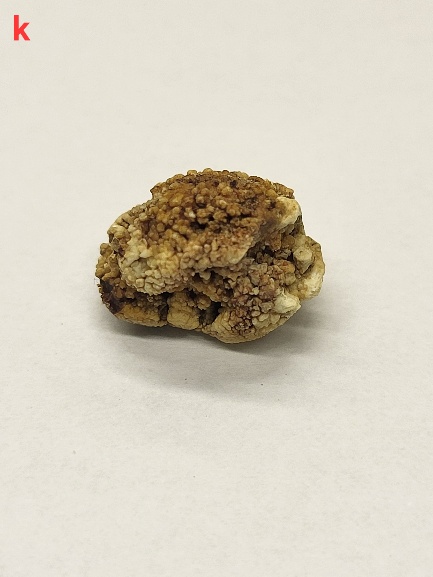

Supplement: Supplementary file 1 [file 0da94ab6f537343be71ed05b.docx]
