# Supplementary material
Source: Research Square preprint supplement (doi:10.21203/rs.3.rs-8967608/v1)
Supplement: Supplementary file 2 [file 1154d58dc790d796895c5ec1.xlsx]

## Sheet: Arkusz1
Table S1. Results of quantitative proteomic analysis of each sialolith sample (control: saliva from healthy donors (pooled))
salivary stone #1 vs saliva from healthy donors (pool)					salivary stone #2 vs saliva from healthy donors (pool)					salivary stone #3 vs saliva from healthy donors (pool)					salivary stone #4 vs saliva from healthy donors (pool)					salivary stone #5 vs saliva from healthy donors (pool)					salivary stone #6 vs saliva from healthy donors (pool)					salivary stone #A vs saliva from healthy donors (pool)					salivary stone #B vs saliva from healthy donors (pool)					salivary stone #C vs saliva from healthy donors (pool)					salivary stone #D vs saliva from healthy donors (pool)
Accession	Protein	Significance	p-value	log2(Fold Change)	Accession	Protein	Significance	p-value	log2(Fold Change)	Accession	Protein	Significance	p-value	log2(Fold Change)	Accession	Protein	Significance	p-value	log2(Fold Change)	Accession	Protein	Significance	p-value	log2(Fold Change)	Accession	Protein	Significance	p-value	log2(Fold Change)	Accession	Protein	Significance	p-value	log2(Fold Change)	Accession	Protein	Significance	p-value	log2(Fold Change)	Accession	Protein	Significance	p-value	log2(Fold Change)	Accession	Protein	Significance	p-value	log2(Fold Change)
P02788	Lactotransferrin	+	0	-1.16689	P02788	Lactotransferrin	+	0.004	-1.78589	P02788	Lactotransferrin	+	0.0143636	-3.11703	P02788	Lactotransferrin	+	0.0108462	-1.11055	P02788	Lactotransferrin		0.483232	0.285048	P02788	Lactotransferrin		0.0731692	-0.709551	P02788	Lactotransferrin		0.0877757	0.533278	P02788	Lactotransferrin	+	0	-2.21782	P02788	Lactotransferrin	+	0.0206667	-1.61123	P02788	Lactotransferrin		0.751912	0.216042
P02768	Albumin	+	0.0027	-1.26914	P02768	Albumin	+	0	-1.77978	P02768	Albumin	+	0.0395455	-2.8182	P02768	Albumin	+	0.00563636	-1.44489	P02768	Albumin	+	0.0108966	-1.49851	P02768	Albumin	+	0.0344615	-0.878784	P02768	Albumin	+	0.00731915	-0.74708	P02768	Albumin	+	0.0206667	-0.785305	P02768	Albumin		0.0962162	-0.29612	P02768	Albumin	+	0.0037037	-1.0503
P05164	Myeloperoxidase	+	0	2.3499	P05164	Myeloperoxidase	+	0	-2.48887	P05164	Myeloperoxidase		0.66797	-0.338284	P05164	Myeloperoxidase		0.671181	-0.134827	P05164	Myeloperoxidase		0.802526	-0.141466	P05164	Myeloperoxidase		0.168944	0.689005	P05164	Myeloperoxidase	+	0.00413333	1.66441	P05164	Myeloperoxidase	+	0.0443544	-0.740002	P05164	Myeloperoxidase		0.113366	0.593721	P05164	Myeloperoxidase	+	0	2.35769
P19013	Keratin, type II cytoskeletal 4	+	0.00317647	-3.78138	P19013	Keratin, type II cytoskeletal 4	+	0.0332525	-3.31581	P19013	Keratin, type II cytoskeletal 4	+	0.0117209	-2.04162	P19013	Keratin, type II cytoskeletal 4	+	0.02995	-1.38678	P19013	Keratin, type II cytoskeletal 4	+	0.0117037	-2.98913	P19013	Keratin, type II cytoskeletal 4		0.096	-1.20006	P19013	Keratin, type II cytoskeletal 4	+	0.00721311	-2.4539	P19013	Keratin, type II cytoskeletal 4		0.436947	1.89405	P19013	Keratin, type II cytoskeletal 4	+	0.0124	-2.47309	P19013	Keratin, type II cytoskeletal 4	+	0	-4.23488
Q9HC84	Mucin-5B	+	0.0313535	-3.19362	Q9HC84	Mucin-5B	+	0.0052766	-2.47242	Q9HC84	Mucin-5B		0.390574	-0.162466	Q9HC84	Mucin-5B		0.179483	-0.618689	Q9HC84	Mucin-5B		0.86365	0.125422	Q9HC84	Mucin-5B	+	0.03216	0.583075	Q9HC84	Mucin-5B		0.05925	-1.70264	Q9HC84	Mucin-5B		0.230885	-0.840158	Q9HC84	Mucin-5B		0.113108	-2.23252	Q9HC84	Mucin-5B	+	0.00570588	-3.54689
P01024	Complement C3	+	0	-2.3778	P01024	Complement C3	+	0	-3.24692	P01024	Complement C3	+	0.0132632	-2.36828	P01024	Complement C3	+	0.0143333	-1.70603	P01024	Complement C3	+	0.008	-2.43173	P01024	Complement C3	+	0.0315	-2.18691	P01024	Complement C3	+	0	-2.41691	P01024	Complement C3	+	0.0111628	-3.00251	P01024	Complement C3	+	0.0177143	-2.41335	P01024	Complement C3	+	0	-2.98704
P02808	Statherin	+	0.00504348	-2.45795	P02808	Statherin	+	0.0067027	-1.23053	P02808	Statherin	+	0.0162	-2.99511	P02808	Statherin	+	0.0307765	-1.1458	P02808	Statherin		0.991	-0.407954	P02808	Statherin		0.236	0.440196	P02808	Statherin		0.107855	-0.605073	P02808	Statherin	+	0.00828571	-1.5989	P02808	Statherin		0.540976	0.128178	P02808	Statherin		0.0611089	-1.95061
P02787	Serotransferrin	+	0.0292766	-1.18422	P02787	Serotransferrin		0.611785	0.170307	P02787	Serotransferrin		0.404677	-1.36667	P02787	Serotransferrin		0.624413	-0.677948	P02787	Serotransferrin		0.231924	-1.0687	P02787	Serotransferrin		0.0642667	0.625598	P02787	Serotransferrin		0.967223	-0.0712729	P02787	Serotransferrin	+	0.0226269	-0.754576	P02787	Serotransferrin		0.707778	0.528378	P02787	Serotransferrin	+	0.0253953	-1.20774
P15924	Desmoplakin	+	0.024186	-1.44	P15924	Desmoplakin		0.0983363	-0.580856	P15924	Desmoplakin	+	0.0129231	-2.76521	P15924	Desmoplakin	+	0.028169	-2.74753	P15924	Desmoplakin		0.0728941	-1.96718	P15924	Desmoplakin		0.770029	0.264745	P15924	Desmoplakin	+	0.00688	-1.39322	P15924	Desmoplakin		0.978319	-0.279316	P15924	Desmoplakin		0.904741	1.04092	P15924	Desmoplakin	+	0	-2.79691
P0DUB6	Alpha-amylase 1A	+	0.0116667	-2.88246	P0DUB6	Alpha-amylase 1A	+	0.00516667	-2.08294	P0DUB6	Alpha-amylase 1A	+	0.0137391	-2.31598	P0DUB6	Alpha-amylase 1A	+	0.0385495	-1.9551	P0DUB6	Alpha-amylase 1A	+	0.0389851	-2.40178	P0DUB6	Alpha-amylase 1A		0.171724	-1.45083	P0DUB6	Alpha-amylase 1A	+	0.00666667	-2.0027	P0DUB6	Alpha-amylase 1A	+	0	-0.934998	P0DUB6	Alpha-amylase 1A		0.0715625	-1.35642	P0DUB6	Alpha-amylase 1A	+	0.00487805	-1.73371
P68871	Hemoglobin subunit beta	+	0	-3.87629	P68871	Hemoglobin subunit beta		0.647278	0.483141	P68871	Hemoglobin subunit beta	+	0	-2.78202	P68871	Hemoglobin subunit beta	+	0	-2.9183	P68871	Hemoglobin subunit beta	+	0.016	0.755285	P68871	Hemoglobin subunit beta		0.392561	-0.0955029	P68871	Hemoglobin subunit beta		0.086566	1.30094	P68871	Hemoglobin subunit beta		0.991914	1.94849	P68871	Hemoglobin subunit beta		0.504727	-2.56871	P68871	Hemoglobin subunit beta		0.731676	1.09046
P13646	Keratin, type I cytoskeletal 13	+	0.003375	-1.81849	P13646	Keratin, type I cytoskeletal 13	+	0.00659649	-1.78423	P13646	Keratin, type I cytoskeletal 13		0.0694043	-1.4588	P13646	Keratin, type I cytoskeletal 13		0.0926733	-0.5384	P13646	Keratin, type I cytoskeletal 13	+	0.018566	-0.942299	P13646	Keratin, type I cytoskeletal 13		0.9776	-1.09185	P13646	Keratin, type I cytoskeletal 13	+	0.0132923	-1.53499	P13646	Keratin, type I cytoskeletal 13	+	0	3.3462	P13646	Keratin, type I cytoskeletal 13	+	0.0404762	-1.35265	P13646	Keratin, type I cytoskeletal 13	+	0.00685714	-1.56138
P61626	Lysozyme C	+	0.00372414	0.971325	P61626	Lysozyme C	+	0	5.36187	P61626	Lysozyme C	+	0.0263	-0.96436	P61626	Lysozyme C		0.916175	0.077383	P61626	Lysozyme C	+	0	2.8683	P61626	Lysozyme C	+	0	2.1758	P61626	Lysozyme C	+	0	2.78255	P61626	Lysozyme C	+	0.0266667	0.435083	P61626	Lysozyme C	+	0.0414634	1.41128	P61626	Lysozyme C		0.840029	0.888657
P01023	Alpha-2-macroglobulin	+	0	-2.02668	P01023	Alpha-2-macroglobulin	+	0	-3.43427	P01023	Alpha-2-macroglobulin	+	0.0147273	-1.99453	P01023	Alpha-2-macroglobulin	+	0.00826667	-2.28252	P01023	Alpha-2-macroglobulin	+	0.00902857	-2.3506	P01023	Alpha-2-macroglobulin	+	0.0314667	-1.70275	P01023	Alpha-2-macroglobulin	+	0	-1.72863	P01023	Alpha-2-macroglobulin	+	0.0210566	-2.79813	P01023	Alpha-2-macroglobulin	+	0	-1.47828	P01023	Alpha-2-macroglobulin	+	0.00490909	-3.21781
P69905	Hemoglobin subunit alpha	+	0	-2.06007	P69905	Hemoglobin subunit alpha	+	0	-2.97967	P69905	Hemoglobin subunit alpha	+	0.012	-3.35373	P69905	Hemoglobin subunit alpha	+	0.0108837	-2.60453	P69905	Hemoglobin subunit alpha	+	0.024	-1.07981	P69905	Hemoglobin subunit alpha	+	0.0182857	-2.08972	P69905	Hemoglobin subunit alpha	+	0	-1.1134	P69905	Hemoglobin subunit alpha	+	0.012	-1.81436	P69905	Hemoglobin subunit alpha	+	0	0.958736	P69905	Hemoglobin subunit alpha	+	0	-1.70138
P08311	Cathepsin G		0.971486	-0.571119	P08311	Cathepsin G	+	0.0234222	-1.52749	P08311	Cathepsin G		0.481636	-1.59476	P08311	Cathepsin G		0.293639	-0.462254	P08311	Cathepsin G		0.191765	-0.337969	P08311	Cathepsin G		0.179033	0.508423	P08311	Cathepsin G	+	0.0163784	1.08422	P08311	Cathepsin G		0.802636	-0.577227	P08311	Cathepsin G		0.161374	2.57902	P08311	Cathepsin G	+	0.0341978	2.14698
P0DOX5	Immunoglobulin gamma-1 heavy chain		0.934504	-0.106803	P0DOX5	Immunoglobulin gamma-1 heavy chain	+	0	-2.59708	P0DOX5	Immunoglobulin gamma-1 heavy chain	+	0.0253846	-0.500792	P0DOX5	Immunoglobulin gamma-1 heavy chain	+	0.0355349	-0.632486	P0DOX5	Immunoglobulin gamma-1 heavy chain	+	0.0112857	-1.01022	P0DOX5	Immunoglobulin gamma-1 heavy chain		0.198151	-2.36442	P0DOX5	Immunoglobulin gamma-1 heavy chain	+	0.006875	-2.02385	P0DOX5	Immunoglobulin gamma-1 heavy chain	+	0.0233684	-2.64172	P0DOX5	Immunoglobulin gamma-1 heavy chain	+	0.0379487	-1.43349	P0DOX5	Immunoglobulin gamma-1 heavy chain	+	0.00579104	-1.19485
P01876	Immunoglobulin heavy constant alpha 1		0.902277	-0.30153	P01876	Immunoglobulin heavy constant alpha 1		0.0898545	-2.30004	P01876	Immunoglobulin heavy constant alpha 1		0.256417	-1.13538	P01876	Immunoglobulin heavy constant alpha 1		0.0625263	-0.84351	P01876	Immunoglobulin heavy constant alpha 1		0.0645366	-2.53833	P01876	Immunoglobulin heavy constant alpha 1		0.310835	-0.192492	P01876	Immunoglobulin heavy constant alpha 1	+	0.0390435	-0.809429	P01876	Immunoglobulin heavy constant alpha 1	+	0.0233231	-0.952633	P01876	Immunoglobulin heavy constant alpha 1		0.0561429	-0.291374	P01876	Immunoglobulin heavy constant alpha 1	+	0	-1.35069
P01833	Polymeric immunoglobulin receptor	+	0.0326737	-4.78493	P01833	Polymeric immunoglobulin receptor	+	0	-4.00151	P01833	Polymeric immunoglobulin receptor		0.143525	-1.76176	P01833	Polymeric immunoglobulin receptor	+	0.01376	-3.20926	P01833	Polymeric immunoglobulin receptor		0.132784	-0.685183	P01833	Polymeric immunoglobulin receptor	+	0.028	-2.76409	P01833	Polymeric immunoglobulin receptor	+	0	-2.92874	P01833	Polymeric immunoglobulin receptor	+	0.0114286	-2.72624	P01833	Polymeric immunoglobulin receptor	+	0.0478298	-3.27151	P01833	Polymeric immunoglobulin receptor	+	0.0288636	-1.83073
P20160	Azurocidin	+	0.00906667	1.55497	P20160	Azurocidin		0.0890714	-0.502529	P20160	Azurocidin		0.160679	0.802786	P20160	Azurocidin	+	0.021	1.23558	P20160	Azurocidin		0.247741	-0.206154	P20160	Azurocidin		0.124346	1.11224	P20160	Azurocidin	+	0.0199481	1.31514	P20160	Azurocidin		0.478633	-0.242235	P20160	Azurocidin	+	0.0201333	1.57463	P20160	Azurocidin	+	0.00377358	1.73917
P01037	Cystatin-SN	+	0.012	-2.68958	P01037	Cystatin-SN	+	0.00459259	-2.95848	P01037	Cystatin-SN	+	0.0137143	-2.33384	P01037	Cystatin-SN	+	0	-2.67103	P01037	Cystatin-SN		0.285895	-0.216604	P01037	Cystatin-SN	+	0	-1.9213	P01037	Cystatin-SN		0.278367	-1.7916	P01037	Cystatin-SN	+	0	-2.49352	P01037	Cystatin-SN		0.0827606	-2.50663	P01037	Cystatin-SN	+	0.00493333	-2.89368
P08779	Keratin, type I cytoskeletal 16		0.238142	-2.80663	P08779	Keratin, type I cytoskeletal 16	+	0.03508	-1.25396	P08779	Keratin, type I cytoskeletal 16		0.314512	-3.16029	P08779	Keratin, type I cytoskeletal 16	+	0.0354157	-1.91165	P08779	Keratin, type I cytoskeletal 16		0.245468	-0.46315	P08779	Keratin, type I cytoskeletal 16	+	0.03625	1.94836	P08779	Keratin, type I cytoskeletal 16		0.29524	-1.34977	P08779	Keratin, type I cytoskeletal 16		0.619168	-1.68469	P08779	Keratin, type I cytoskeletal 16		0.0831765	-1.11241	P08779	Keratin, type I cytoskeletal 16	+	0.00676056	-2.32153
P0C0L4	Complement C4-A	+	0.00515556	-3.45344	P0C0L4	Complement C4-A	+	0.0291915	-3.29681	P0C0L4	Complement C4-A	+	0.0317241	-2.58475	P0C0L4	Complement C4-A		0.0677083	-1.78165	P0C0L4	Complement C4-A		0.16924	-0.819955	P0C0L4	Complement C4-A	+	0.0372632	-2.70954	P0C0L4	Complement C4-A		0.0901111	-3.43834	P0C0L4	Complement C4-A		0.0596279	-1.49524	P0C0L4	Complement C4-A		0.124138	-2.60689	P0C0L4	Complement C4-A	+	0.0242353	-3.11963
P06702	Protein S100-A9		0.995035	-0.11306	P06702	Protein S100-A9	+	0.00626667	-2.06793	P06702	Protein S100-A9		0.803229	-0.0210609	P06702	Protein S100-A9		0.76	0.188828	P06702	Protein S100-A9		0.223346	-0.837797	P06702	Protein S100-A9		0.929652	0.93062	P06702	Protein S100-A9		0.330065	-0.153673	P06702	Protein S100-A9		0.686264	-1.02834	P06702	Protein S100-A9		0.216538	1.70271	P06702	Protein S100-A9		0.545692	-0.0252972
P04264	Keratin, type II cytoskeletal 1		0.173984	-0.676171	P04264	Keratin, type II cytoskeletal 1		0.17842	-0.722643	P04264	Keratin, type II cytoskeletal 1	+	0.02512	-1.45693	P04264	Keratin, type II cytoskeletal 1	+	0.00652632	3.73954	P04264	Keratin, type II cytoskeletal 1	+	0.0389333	1.58989	P04264	Keratin, type II cytoskeletal 1		0.61226	2.0177	P04264	Keratin, type II cytoskeletal 1		1	0.145917	P04264	Keratin, type II cytoskeletal 1		0.0990112	-0.862105	P04264	Keratin, type II cytoskeletal 1		0.12414	-1.59505	P04264	Keratin, type II cytoskeletal 1		0.17447	-0.610168
P02814	Submaxillary gland androgen-regulated protein 3B	+	0	-5.01287	P02814	Submaxillary gland androgen-regulated protein 3B	+	0	-4.84536	P02814	Submaxillary gland androgen-regulated protein 3B	+	0	-4.60725	P02814	Submaxillary gland androgen-regulated protein 3B	+	0	-4.68756	P02814	Submaxillary gland androgen-regulated protein 3B	+	0.0101935	-4.32226	P02814	Submaxillary gland androgen-regulated protein 3B	+	0.0256	-3.6471	P02814	Submaxillary gland androgen-regulated protein 3B	+	0	-4.48994	P02814	Submaxillary gland androgen-regulated protein 3B	+	0	-6.41551	P02814	Submaxillary gland androgen-regulated protein 3B	+	0	-5.02703	P02814	Submaxillary gland androgen-regulated protein 3B	+	0	-5.48958
P04083	Annexin A1	+	0	-3.27378	P04083	Annexin A1	+	0	-3.14264	P04083	Annexin A1	+	0.0137143	-3.17468	P04083	Annexin A1	+	0.0358182	-1.43082	P04083	Annexin A1	+	0.0166316	-1.86472	P04083	Annexin A1		0.372189	-0.266929	P04083	Annexin A1	+	0.0155429	-1.91956	P04083	Annexin A1	+	0.0109091	-3.81378	P04083	Annexin A1		0.440101	-2.71877	P04083	Annexin A1	+	0	-3.13498
P05109	Protein S100-A8		0.173049	5.77602	P05109	Protein S100-A8		0.704882	0.457824	P05109	Protein S100-A8		0.252772	6.4956	P05109	Protein S100-A8	+	0	5.16231	P05109	Protein S100-A8	+	0.0157143	4.12659	P05109	Protein S100-A8		0.11735	4.41938	P05109	Protein S100-A8	+	0	4.07238	P05109	Protein S100-A8		0.228275	4.36877	P05109	Protein S100-A8		0.818075	-1.04703	P05109	Protein S100-A8		0.329574	5.13818
P13647	Keratin, type II cytoskeletal 5	+	0	-2.6554	P13647	Keratin, type II cytoskeletal 5	+	0.0477692	-1.08435	P13647	Keratin, type II cytoskeletal 5	+	0.0145075	-3.21807	P13647	Keratin, type II cytoskeletal 5		0.695688	0.219625	P13647	Keratin, type II cytoskeletal 5		0.528413	0.104161	P13647	Keratin, type II cytoskeletal 5		0.874248	0.382053	P13647	Keratin, type II cytoskeletal 5	+	0.00628571	-2.02783	P13647	Keratin, type II cytoskeletal 5		0.20097	4.94802	P13647	Keratin, type II cytoskeletal 5		0.309964	-2.4757	P13647	Keratin, type II cytoskeletal 5		0.074019	-1.42083
Q6MZM9	Proline-rich protein 27	+	0.0279556	-2.16174	Q6MZM9	Proline-rich protein 27	+	0.00344444	-3.89378	Q6MZM9	Proline-rich protein 27	+	0.0124848	-3.14618	Q6MZM9	Proline-rich protein 27	+	0.012	-1.2986	Q6MZM9	Proline-rich protein 27	+	0.00957576	-2.04264	Q6MZM9	Proline-rich protein 27		0.167765	-0.750945	Q6MZM9	Proline-rich protein 27	+	0.0209231	-1.6898	Q6MZM9	Proline-rich protein 27	+	0.00514286	-2.93576	Q6MZM9	Proline-rich protein 27		0.209864	-0.943248	Q6MZM9	Proline-rich protein 27	+	0.0036	-1.62759
P13645	Keratin, type I cytoskeletal 10	+	0.00327273	-2.65842	P13645	Keratin, type I cytoskeletal 10	+	0.0470291	-1.71941	P13645	Keratin, type I cytoskeletal 10		0.303829	-2.22396	P13645	Keratin, type I cytoskeletal 10	+	0.0150968	1.14277	P13645	Keratin, type I cytoskeletal 10		0.31127	-0.452995	P13645	Keratin, type I cytoskeletal 10		0.247876	-0.626658	P13645	Keratin, type I cytoskeletal 10	+	0.0104762	-1.33614	P13645	Keratin, type I cytoskeletal 10		0.0562927	-1.39259	P13645	Keratin, type I cytoskeletal 10		0.0927671	-2.23218	P13645	Keratin, type I cytoskeletal 10	+	0.0325393	-2.21112
P08246	Neutrophil elastase	+	0	-2.3638	P08246	Neutrophil elastase	+	0	-3.2035	P08246	Neutrophil elastase	+	0.00933333	-2.71121	P08246	Neutrophil elastase	+	0.0115102	-3.1615	P08246	Neutrophil elastase	+	0.0121538	-2.20793	P08246	Neutrophil elastase	+	0.0365455	-2.28468	P08246	Neutrophil elastase		0.30423	-0.0476055	P08246	Neutrophil elastase	+	0.02912	-1.43095	P08246	Neutrophil elastase	+	0.0223704	-2.64925	P08246	Neutrophil elastase	+	0.00434783	-1.60198
P02675	Fibrinogen beta chain		0.109675	-1.47709	P02675	Fibrinogen beta chain		0.369528	0.736589	P02675	Fibrinogen beta chain		0.155962	-2.82745	P02675	Fibrinogen beta chain	+	0.0303291	-1.99269	P02675	Fibrinogen beta chain		0.796537	0.060173	P02675	Fibrinogen beta chain		0.643528	-1.79373	P02675	Fibrinogen beta chain		0.872058	0.0114346	P02675	Fibrinogen beta chain		0.569129	-0.772985	P02675	Fibrinogen beta chain	+	0.0232308	2.66141	P02675	Fibrinogen beta chain		0.501767	-0.765869
P35579	Myosin-9		0.236444	-0.510072	P35579	Myosin-9	+	0.0316701	-2.10284	P35579	Myosin-9		0.164822	-0.41096	P35579	Myosin-9		0.362797	-0.00416851	P35579	Myosin-9		0.243585	-0.496922	P35579	Myosin-9		0.682419	0.697495	P35579	Myosin-9		0.20386	-0.581768	P35579	Myosin-9		0.463586	0.0656929	P35579	Myosin-9		0.37447	-0.0498343	P35579	Myosin-9		0.243525	-0.328984
P01009	Alpha-1-antitrypsin	+	0.00257143	-3.18811	P01009	Alpha-1-antitrypsin	+	0.022913	-1.13776	P01009	Alpha-1-antitrypsin		0.226739	-0.672014	P01009	Alpha-1-antitrypsin	+	0.0137647	-1.68757	P01009	Alpha-1-antitrypsin		0.0774382	-1.21877	P01009	Alpha-1-antitrypsin		0.30941	-0.558513	P01009	Alpha-1-antitrypsin	+	0.00661538	-1.53732	P01009	Alpha-1-antitrypsin	+	0.0237333	-1.62766	P01009	Alpha-1-antitrypsin	+	0.0252632	-1.98515	P01009	Alpha-1-antitrypsin	+	0.004	-2.45326
P35908	Keratin, type II cytoskeletal 2 epidermal	+	0.00454902	-3.05268	P35908	Keratin, type II cytoskeletal 2 epidermal	+	0.00827778	-2.94419	P35908	Keratin, type II cytoskeletal 2 epidermal	+	0.01008	-3.26507	P35908	Keratin, type II cytoskeletal 2 epidermal	+	0.0110588	-2.87974	P35908	Keratin, type II cytoskeletal 2 epidermal	+	0.0398421	-2.75693	P35908	Keratin, type II cytoskeletal 2 epidermal		0.0792941	-1.81146	P35908	Keratin, type II cytoskeletal 2 epidermal	+	0.0206582	-2.58505	P35908	Keratin, type II cytoskeletal 2 epidermal		0.0637701	-2.56141	P35908	Keratin, type II cytoskeletal 2 epidermal		0.0607458	-2.23883	P35908	Keratin, type II cytoskeletal 2 epidermal	+	0.00519298	-3.33642
P30740	Leukocyte elastase inhibitor	+	0.00446154	-1.28472	P30740	Leukocyte elastase inhibitor	+	0	-2.32834	P30740	Leukocyte elastase inhibitor	+	0.0250633	-1.24328	P30740	Leukocyte elastase inhibitor	+	0.0216774	-0.863512	P30740	Leukocyte elastase inhibitor	+	0.00738462	-2.12044	P30740	Leukocyte elastase inhibitor		0.169773	-0.256816	P30740	Leukocyte elastase inhibitor	+	0	-1.19479	P30740	Leukocyte elastase inhibitor		0.468874	-0.141487	P30740	Leukocyte elastase inhibitor		0.0974933	-0.844689	P30740	Leukocyte elastase inhibitor	+	0.0198537	-2.55341
P35527	Keratin, type I cytoskeletal 9	+	0.0234762	-1.50414	P35527	Keratin, type I cytoskeletal 9	+	0.00749206	-2.31744	P35527	Keratin, type I cytoskeletal 9	+	0.0149538	-1.54772	P35527	Keratin, type I cytoskeletal 9	+	0.0307179	2.34494	P35527	Keratin, type I cytoskeletal 9	+	0.0394595	-0.958016	P35527	Keratin, type I cytoskeletal 9		0.145783	-0.750965	P35527	Keratin, type I cytoskeletal 9		0.183894	-1.73736	P35527	Keratin, type I cytoskeletal 9	+	0.0229697	-2.61127	P35527	Keratin, type I cytoskeletal 9	+	0.0236129	-1.24546	P35527	Keratin, type I cytoskeletal 9	+	0.00317647	-2.26319
P02810	Salivary acidic proline-rich phosphoprotein 1/2	+	0.0465225	-2.59148	P02810	Salivary acidic proline-rich phosphoprotein 1/2	+	0.00951351	-2.16853	P02810	Salivary acidic proline-rich phosphoprotein 1/2	+	0.0131667	-3.01851	P02810	Salivary acidic proline-rich phosphoprotein 1/2	+	0.0311429	-1.70173	P02810	Salivary acidic proline-rich phosphoprotein 1/2	+	0.0150476	3.48832	P02810	Salivary acidic proline-rich phosphoprotein 1/2		0.0587925	1.12763	P02810	Salivary acidic proline-rich phosphoprotein 1/2	+	0.0444681	-1.53538	P02810	Salivary acidic proline-rich phosphoprotein 1/2		0.388468	-0.891386	P02810	Salivary acidic proline-rich phosphoprotein 1/2		0.156536	-1.29008	P02810	Salivary acidic proline-rich phosphoprotein 1/2	+	0.00392157	-2.85131
P07355	Annexin A2	+	0	-4.03291	P07355	Annexin A2	+	0.00563636	-3.86636	P07355	Annexin A2	+	0.0147692	-4.71708	P07355	Annexin A2	+	0.0265672	-2.9087	P07355	Annexin A2	+	0.00877778	-3.37776	P07355	Annexin A2	+	0.029	-3.08035	P07355	Annexin A2	+	0.00819048	-2.70404	P07355	Annexin A2	+	0.00415385	-2.78624	P07355	Annexin A2		0.129393	-1.35612	P07355	Annexin A2	+	0.00485246	-3.73739
P02647	Apolipoprotein A-I	+	0.012	-2.95173	P02647	Apolipoprotein A-I	+	0.00964384	-4.04146	P02647	Apolipoprotein A-I	+	0.0121176	-4.19414	P02647	Apolipoprotein A-I	+	0.0220328	-2.65939	P02647	Apolipoprotein A-I		0.099871	-1.90037	P02647	Apolipoprotein A-I		0.153333	-1.47533	P02647	Apolipoprotein A-I	+	0.0143284	-3.26644	P02647	Apolipoprotein A-I	+	0.0202909	-3.21326	P02647	Apolipoprotein A-I		0.0705806	-2.28131	P02647	Apolipoprotein A-I	+	0.004625	-4.09232
P00738	Haptoglobin	+	0.018716	-0.624326	P00738	Haptoglobin		0.139655	-0.544575	P00738	Haptoglobin		0.692735	-0.179333	P00738	Haptoglobin		0.836657	0.366917	P00738	Haptoglobin		0.0664096	0.953876	P00738	Haptoglobin		0.427236	0.292814	P00738	Haptoglobin	+	0.0218571	-0.833556	P00738	Haptoglobin		0.386422	0.442376	P00738	Haptoglobin	+	0.0364571	3.03342	P00738	Haptoglobin		0.26279	-0.733999
P12273	Prolactin-inducible protein	+	0.0123117	-1.91718	P12273	Prolactin-inducible protein	+	0.0239545	-1.70336	P12273	Prolactin-inducible protein		0.391188	-1.0806	P12273	Prolactin-inducible protein	+	0.0389778	-2.3014	P12273	Prolactin-inducible protein		0.122333	-2.89478	P12273	Prolactin-inducible protein		0.0586182	-2.17126	P12273	Prolactin-inducible protein		0.063134	-3.07281	P12273	Prolactin-inducible protein		0.800692	0.0607548	P12273	Prolactin-inducible protein		0.806954	-0.538258	P12273	Prolactin-inducible protein	+	0.0200988	-3.50136
P04406	Glyceraldehyde-3-phosphate dehydrogenase	+	0.032549	-2.15634	P04406	Glyceraldehyde-3-phosphate dehydrogenase	+	0	-2.97859	P04406	Glyceraldehyde-3-phosphate dehydrogenase		0.303085	-2.06269	P04406	Glyceraldehyde-3-phosphate dehydrogenase	+	0.0351264	-1.1481	P04406	Glyceraldehyde-3-phosphate dehydrogenase		0.38678	0.266311	P04406	Glyceraldehyde-3-phosphate dehydrogenase		0.691023	-0.00794792	P04406	Glyceraldehyde-3-phosphate dehydrogenase	+	0	-2.55752	P04406	Glyceraldehyde-3-phosphate dehydrogenase		0.513475	0.971755	P04406	Glyceraldehyde-3-phosphate dehydrogenase		0.0597551	-1.51404	P04406	Glyceraldehyde-3-phosphate dehydrogenase		0.608992	-0.265032
P03973	Antileukoproteinase		0.695941	1.30535	P03973	Antileukoproteinase		0.586992	-0.75102	P03973	Antileukoproteinase	+	0.0158	-4.02466	P03973	Antileukoproteinase	+	0.0123158	-1.46307	P03973	Antileukoproteinase		0.167564	-0.812835	P03973	Antileukoproteinase		0.63552	0.0034771	P03973	Antileukoproteinase	+	0.00647059	-0.986205	P03973	Antileukoproteinase		0.859821	-1.31588	P03973	Antileukoproteinase		0.941109	-0.547785	P03973	Antileukoproteinase		0.378016	-1.63848
P25311	Zinc-alpha-2-glycoprotein	+	0.0121538	-1.3194	P25311	Zinc-alpha-2-glycoprotein	+	0.00839437	-2.80639	P25311	Zinc-alpha-2-glycoprotein	+	0.0204638	-2.02245	P25311	Zinc-alpha-2-glycoprotein	+	0.01175	-2.11251	P25311	Zinc-alpha-2-glycoprotein		0.244364	-0.810194	P25311	Zinc-alpha-2-glycoprotein		0.312385	-1.79402	P25311	Zinc-alpha-2-glycoprotein		0.0817308	-1.8123	P25311	Zinc-alpha-2-glycoprotein		0.233126	-2.22957	P25311	Zinc-alpha-2-glycoprotein		0.251581	-0.579041	P25311	Zinc-alpha-2-glycoprotein	+	0.00596923	-2.13177
Q96DA0	Pancreatic adenocarcinoma up-regulated factor	+	0.01264	0.848368	Q96DA0	Pancreatic adenocarcinoma up-regulated factor		0.57054	0.267457	Q96DA0	Pancreatic adenocarcinoma up-regulated factor	+	0.0268434	-0.642787	Q96DA0	Pancreatic adenocarcinoma up-regulated factor		0.0670103	-1.63773	Q96DA0	Pancreatic adenocarcinoma up-regulated factor		0.898232	0.57773	Q96DA0	Pancreatic adenocarcinoma up-regulated factor		0.0742687	-0.496316	Q96DA0	Pancreatic adenocarcinoma up-regulated factor	+	0	1.61202	Q96DA0	Pancreatic adenocarcinoma up-regulated factor	+	0.02225	1.21723	Q96DA0	Pancreatic adenocarcinoma up-regulated factor		0.404414	0.0172329	Q96DA0	Pancreatic adenocarcinoma up-regulated factor		0.0556289	-1.91029
P04040	Catalase	+	0.00276923	-4.13552	P04040	Catalase	+	0.01325	-4.10888	P04040	Catalase	+	0.0159344	-3.57424	P04040	Catalase	+	0.0126486	-3.34769	P04040	Catalase	+	0.0387397	-2.27092	P04040	Catalase		0.472441	-0.657193	P04040	Catalase	+	0.0437849	-3.87563	P04040	Catalase	+	0.0229655	-3.67954	P04040	Catalase	+	0.0510909	-2.75361	P04040	Catalase		0.230906	-1.92575
Q04695	Keratin, type I cytoskeletal 17		0.33662	-0.132421	Q04695	Keratin, type I cytoskeletal 17		0.192133	-2.82393	Q04695	Keratin, type I cytoskeletal 17		0.253097	-1.87187	Q04695	Keratin, type I cytoskeletal 17		0.238521	-0.367825	Q04695	Keratin, type I cytoskeletal 17		0.561984	-0.298266	Q04695	Keratin, type I cytoskeletal 17		0.142146	1.09606	Q04695	Keratin, type I cytoskeletal 17		0.811333	0.427321	Q04695	Keratin, type I cytoskeletal 17		0.425947	0.672557	Q04695	Keratin, type I cytoskeletal 17		0.975543	-0.129791	Q04695	Keratin, type I cytoskeletal 17		0.108954	-2.6893
Q9UGM3	Scavenger receptor cysteine-rich domain-containing protein DMBT1	+	0.0042963	-1.71128	Q9UGM3	Scavenger receptor cysteine-rich domain-containing protein DMBT1	+	0.0108947	-2.43864	Q9UGM3	Scavenger receptor cysteine-rich domain-containing protein DMBT1	+	0.0151034	-1.81076	Q9UGM3	Scavenger receptor cysteine-rich domain-containing protein DMBT1	+	0.0261765	-2.59306	Q9UGM3	Scavenger receptor cysteine-rich domain-containing protein DMBT1	+	0.0279298	-1.81554	Q9UGM3	Scavenger receptor cysteine-rich domain-containing protein DMBT1		0.775022	0.653769	Q9UGM3	Scavenger receptor cysteine-rich domain-containing protein DMBT1		0.206793	-1.18924	Q9UGM3	Scavenger receptor cysteine-rich domain-containing protein DMBT1	+	0.0265405	-2.22172	Q9UGM3	Scavenger receptor cysteine-rich domain-containing protein DMBT1		0.111529	-0.853428	Q9UGM3	Scavenger receptor cysteine-rich domain-containing protein DMBT1	+	0	-4.31006
P12724	Eosinophil cationic protein	+	0.0036	2.36086	P12724	Eosinophil cationic protein	+	0.0208837	1.74185	P12724	Eosinophil cationic protein		0.0664348	0.883958	P12724	Eosinophil cationic protein	+	0	4.36365	P12724	Eosinophil cationic protein	+	0.048	4.64197	P12724	Eosinophil cationic protein	+	0.0252	3.2586	P12724	Eosinophil cationic protein	+	0	3.92381	P12724	Eosinophil cationic protein		0.995829	0.0806274	P12724	Eosinophil cationic protein	+	0.0228571	2.08682	P12724	Eosinophil cationic protein	+	0.0054	3.15582
P17213	Bactericidal permeability-increasing protein	+	0	-5.47142	P17213	Bactericidal permeability-increasing protein	+	0	-4.57175	P17213	Bactericidal permeability-increasing protein	+	0	-4.1986	P17213	Bactericidal permeability-increasing protein	+	0	-4.25783	P17213	Bactericidal permeability-increasing protein	+	0.00872727	-3.21321	P17213	Bactericidal permeability-increasing protein		0.0965556	-1.78955	P17213	Bactericidal permeability-increasing protein	+	0.00563636	-3.27481	P17213	Bactericidal permeability-increasing protein	+	0.0054	-5.1346	P17213	Bactericidal permeability-increasing protein	+	0.0343529	-2.45309	P17213	Bactericidal permeability-increasing protein	+	0.00308571	-3.01515
P59665	Neutrophil defensin 1	+	0.0276484	-1.48756	P59665	Neutrophil defensin 1		0.60031	-0.914129	P59665	Neutrophil defensin 1		0.239321	-1.61227	P59665	Neutrophil defensin 1		0.106113	-0.226028	P59665	Neutrophil defensin 1		0.806848	0.647723	P59665	Neutrophil defensin 1		0.184391	-0.45925	P59665	Neutrophil defensin 1		0.227559	0.0965223	P59665	Neutrophil defensin 1	+	0.00859259	-2.37481	P59665	Neutrophil defensin 1		0.259698	-0.605085	P59665	Neutrophil defensin 1		0.0561633	-0.76299
Q8NFU4	Follicular dendritic cell secreted peptide	+	0.0226024	-1.82117	Q8NFU4	Follicular dendritic cell secreted peptide	+	0.00616393	-2.03358	Q8NFU4	Follicular dendritic cell secreted peptide		0.12972	-2.25666	Q8NFU4	Follicular dendritic cell secreted peptide	+	0.0161379	-1.64018	Q8NFU4	Follicular dendritic cell secreted peptide	+	0.0167111	-1.45404	Q8NFU4	Follicular dendritic cell secreted peptide		0.074623	-1.20479	Q8NFU4	Follicular dendritic cell secreted peptide	+	0.0166027	-2.41817	Q8NFU4	Follicular dendritic cell secreted peptide	+	0.04495	-1.36366	Q8NFU4	Follicular dendritic cell secreted peptide	+	0.0208276	-1.35293	Q8NFU4	Follicular dendritic cell secreted peptide	+	0.00510345	-2.02082
P14618	Pyruvate kinase PKM	+	0.0085	-3.12255	P14618	Pyruvate kinase PKM		0.718131	-1.26783	P14618	Pyruvate kinase PKM	+	0.0105	-4.36212	P14618	Pyruvate kinase PKM	+	0.0292195	-1.54554	P14618	Pyruvate kinase PKM		0.0783182	-1.27946	P14618	Pyruvate kinase PKM		0.446559	-0.881617	P14618	Pyruvate kinase PKM		0.0816311	-1.704	P14618	Pyruvate kinase PKM	+	0.0107879	-3.05812	P14618	Pyruvate kinase PKM		0.154274	-1.36437	P14618	Pyruvate kinase PKM	+	0.00408163	-3.03107
P02679	Fibrinogen gamma chain	+	0.0323333	-2.14876	P02679	Fibrinogen gamma chain		0.96922	0.336409	P02679	Fibrinogen gamma chain		0.317133	-1.7378	P02679	Fibrinogen gamma chain		0.108336	-1.02195	P02679	Fibrinogen gamma chain		0.0752184	-2.51065	P02679	Fibrinogen gamma chain		0.0597037	-2.28329	P02679	Fibrinogen gamma chain		0.823526	-0.324633	P02679	Fibrinogen gamma chain		0.399464	-0.485109	P02679	Fibrinogen gamma chain		0.0833623	1.80576	P02679	Fibrinogen gamma chain		0.0701748	-3.00689
P22079	Lactoperoxidase	+	0.0244706	-3.68092	P22079	Lactoperoxidase	+	0.00606452	-3.53943	P22079	Lactoperoxidase	+	0.0244675	-2.43984	P22079	Lactoperoxidase	+	0.012	-2.40845	P22079	Lactoperoxidase		0.207495	-0.639772	P22079	Lactoperoxidase	+	0.048	-2.1821	P22079	Lactoperoxidase	+	0.0188267	-1.95069	P22079	Lactoperoxidase	+	0.0280571	-4.72599	P22079	Lactoperoxidase	+	0.0354444	-2.20376	P22079	Lactoperoxidase	+	0.0142703	-2.89605
P01859	Immunoglobulin heavy constant gamma 2		0.186784	3.10219	P01859	Immunoglobulin heavy constant gamma 2	+	0.00671429	-1.89972	P01859	Immunoglobulin heavy constant gamma 2	+	0.0158462	-2.07971	P01859	Immunoglobulin heavy constant gamma 2		0.959246	-0.053175	P01859	Immunoglobulin heavy constant gamma 2	+	0.0378551	-1.76304	P01859	Immunoglobulin heavy constant gamma 2		0.457828	-0.76396	P01859	Immunoglobulin heavy constant gamma 2	+	0.0223902	-1.44656	P01859	Immunoglobulin heavy constant gamma 2	+	0.0233443	-2.64413	P01859	Immunoglobulin heavy constant gamma 2	+	0.0251667	-2.12323	P01859	Immunoglobulin heavy constant gamma 2		0.956343	0.323584
Q96DR5	BPI fold-containing family A member 2	+	0.03212	-1.06146	Q96DR5	BPI fold-containing family A member 2	+	0.032	-1.20537	Q96DR5	BPI fold-containing family A member 2		0.340488	-1.47811	Q96DR5	BPI fold-containing family A member 2		0.800455	-0.243101	Q96DR5	BPI fold-containing family A member 2		0.286726	-0.818349	Q96DR5	BPI fold-containing family A member 2		0.116416	0.798906	Q96DR5	BPI fold-containing family A member 2		0.0968073	-0.362624	Q96DR5	BPI fold-containing family A member 2		0.945706	-0.0627766	Q96DR5	BPI fold-containing family A member 2		0.16072	-2.11784	Q96DR5	BPI fold-containing family A member 2		0.0736923	-0.330122
P01036	Cystatin-S	+	0	-4.16386	P01036	Cystatin-S	+	0.00637288	-4.29864	P01036	Cystatin-S	+	0.0175556	-4.05508	P01036	Cystatin-S	+	0.0117	-2.69212	P01036	Cystatin-S	+	0.01968	-2.2243	P01036	Cystatin-S		0.0753939	-3.05919	P01036	Cystatin-S	+	0.00764444	-3.72888	P01036	Cystatin-S	+	0.0104348	-3.17825	P01036	Cystatin-S		0.0839429	-1.93999	P01036	Cystatin-S	+	0.00512821	-3.99037
P11678	Eosinophil peroxidase	+	0.0406972	-1.39834	P11678	Eosinophil peroxidase	+	0.00723077	-1.96029	P11678	Eosinophil peroxidase		0.0701505	-2.57521	P11678	Eosinophil peroxidase	+	0.0142545	-1.43747	P11678	Eosinophil peroxidase	+	0.0384118	-1.11587	P11678	Eosinophil peroxidase		0.0629091	-2.22095	P11678	Eosinophil peroxidase	+	0.0185789	-2.04503	P11678	Eosinophil peroxidase	+	0.00490909	-1.8888	P11678	Eosinophil peroxidase	+	0.022875	-1.53602	P11678	Eosinophil peroxidase	+	0.00477419	-1.35499
P14923	Junction plakoglobin	+	0.0081194	-4.86568	P14923	Junction plakoglobin	+	0.00863768	-6.3384	P14923	Junction plakoglobin	+	0.0156429	-6.53158	P14923	Junction plakoglobin	+	0.0133714	-6.14901	P14923	Junction plakoglobin	+	0.0323333	-5.71651	P14923	Junction plakoglobin	+	0.0426667	-7.01185	P14923	Junction plakoglobin	+	0.0086	-5.05058	P14923	Junction plakoglobin	+	0.0144681	-8.77995	P14923	Junction plakoglobin	+	0.0488696	-3.5041	P14923	Junction plakoglobin	+	0.0138947	-3.82627
P80511	Protein S100-A12	+	0.00814545	-4.25692	P80511	Protein S100-A12	+	0.007375	-4.68936	P80511	Protein S100-A12	+	0.0109565	-5.07355	P80511	Protein S100-A12	+	0.0213333	-4.52522	P80511	Protein S100-A12		0.056642	-3.38297	P80511	Protein S100-A12		0.0658621	-3.16684	P80511	Protein S100-A12	+	0.0267442	-3.4958	P80511	Protein S100-A12	+	0.0313684	-3.25975	P80511	Protein S100-A12		0.0590877	-4.34937	P80511	Protein S100-A12	+	0.00562319	-4.54497
P08670	Vimentin	+	0	-4.20961	P08670	Vimentin	+	0.00704478	-4.94871	P08670	Vimentin	+	0.0106667	-3.48489	P08670	Vimentin	+	0.0304444	-2.28772	P08670	Vimentin	+	0.011	-2.41006	P08670	Vimentin	+	0.0337143	-2.48141	P08670	Vimentin	+	0.00476923	-4.05243	P08670	Vimentin	+	0.00988889	-3.00452	P08670	Vimentin	+	0.0401	-3.41045	P08670	Vimentin	+	0.00425532	-4.79525
P08727	Keratin, type I cytoskeletal 19	+	0.0374579	-1.16858	P08727	Keratin, type I cytoskeletal 19	+	0.0134177	-2.19952	P08727	Keratin, type I cytoskeletal 19		0.723391	0.287557	P08727	Keratin, type I cytoskeletal 19		0.101398	-0.675073	P08727	Keratin, type I cytoskeletal 19		0.325966	-0.160438	P08727	Keratin, type I cytoskeletal 19		0.460974	0.250771	P08727	Keratin, type I cytoskeletal 19	+	0	-1.52408	P08727	Keratin, type I cytoskeletal 19	+	0.0373846	1.44942	P08727	Keratin, type I cytoskeletal 19		0.130864	0.419598	P08727	Keratin, type I cytoskeletal 19	+	0.00514286	-1.12545
P06733	Alpha-enolase	+	0	-2.79321	P06733	Alpha-enolase	+	0.003875	-3.74039	P06733	Alpha-enolase	+	0.00988235	-2.61439	P06733	Alpha-enolase		0.100423	-0.695371	P06733	Alpha-enolase	+	0.0182222	-1.54279	P06733	Alpha-enolase		0.175867	-0.889311	P06733	Alpha-enolase	+	0.00905263	-2.87558	P06733	Alpha-enolase		0.619524	0.453155	P06733	Alpha-enolase		0.0574118	-1.95536	P06733	Alpha-enolase	+	0.0127671	-2.22269
P08603	Complement factor H	+	0.0113514	-2.47578	P08603	Complement factor H		0.0776667	-2.27851	P08603	Complement factor H	+	0.0153684	-3.04126	P08603	Complement factor H	+	0.0315263	-2.31443	P08603	Complement factor H	+	0.0156667	-2.76665	P08603	Complement factor H		0.0737778	-2.42952	P08603	Complement factor H	+	0.00637037	-3.30049	P08603	Complement factor H		0.444104	-2.16772	P08603	Complement factor H		0.0962105	-1.99985	P08603	Complement factor H		0.06064	-1.8828
P0DOY2	Immunoglobulin lambda constant 2	+	0.00891803	-3.00247	P0DOY2	Immunoglobulin lambda constant 2	+	0.00364706	-2.97399	P0DOY2	Immunoglobulin lambda constant 2	+	0.00872727	-2.91515	P0DOY2	Immunoglobulin lambda constant 2	+	0	-2.79045	P0DOY2	Immunoglobulin lambda constant 2	+	0.0408125	-1.29882	P0DOY2	Immunoglobulin lambda constant 2	+	0.0494118	-1.36756	P0DOY2	Immunoglobulin lambda constant 2	+	0	-2.36963	P0DOY2	Immunoglobulin lambda constant 2	+	0.0141667	-3.61326	P0DOY2	Immunoglobulin lambda constant 2		0.0675333	-1.41091	P0DOY2	Immunoglobulin lambda constant 2	+	0.00416667	-3.31586
P0DOX2	Immunoglobulin alpha-2 heavy chain		0.907159	-0.494721	P0DOX2	Immunoglobulin alpha-2 heavy chain		0.706925	0.58172	P0DOX2	Immunoglobulin alpha-2 heavy chain		0.75882	0.125937	P0DOX2	Immunoglobulin alpha-2 heavy chain		0.800211	1.04983	P0DOX2	Immunoglobulin alpha-2 heavy chain		0.0885714	3.44405	P0DOX2	Immunoglobulin alpha-2 heavy chain	+	0.0538378	3.75612	P0DOX2	Immunoglobulin alpha-2 heavy chain		0.873235	-0.933273	P0DOX2	Immunoglobulin alpha-2 heavy chain		0.991858	-0.566884	P0DOX2	Immunoglobulin alpha-2 heavy chain		0.760312	-1.27414	P0DOX2	Immunoglobulin alpha-2 heavy chain	+	0.00501695	-1.28053
P00747	Plasminogen	+	0.0115068	-1.34778	P00747	Plasminogen		0.589031	-0.388471	P00747	Plasminogen	+	0.0259753	-1.153	P00747	Plasminogen		0.2402	1.28741	P00747	Plasminogen	+	0.039831	0.927784	P00747	Plasminogen		0.572361	-0.00696754	P00747	Plasminogen	+	0.0141176	-1.15429	P00747	Plasminogen		0.382909	-1.47936	P00747	Plasminogen		0.764713	-0.0572529	P00747	Plasminogen		0.149286	-0.6603
Q9UBG3	Cornulin	+	0.00788406	-1.96297	Q9UBG3	Cornulin	+	0.00726154	-2.13098	Q9UBG3	Cornulin	+	0.0096	-3.42645	Q9UBG3	Cornulin	+	0.0172414	-2.34753	Q9UBG3	Cornulin	+	0.0137391	-2.77717	Q9UBG3	Cornulin		0.0721356	-2.66282	Q9UBG3	Cornulin	+	0.0067451	-2.79356	Q9UBG3	Cornulin		0.13367	-2.2867	Q9UBG3	Cornulin		0.37586	-0.791103	Q9UBG3	Cornulin	+	0.0345778	-2.86331
P24158	Myeloblastin	+	0.00473469	1.71192	P24158	Myeloblastin		0.613008	-0.566032	P24158	Myeloblastin		0.467298	-0.208432	P24158	Myeloblastin		0.113455	0.430008	P24158	Myeloblastin	+	0.0216	1.05936	P24158	Myeloblastin	+	0.0510769	0.983844	P24158	Myeloblastin	+	0	2.21366	P24158	Myeloblastin		0.467521	-0.63948	P24158	Myeloblastin		0.145161	1.99099	P24158	Myeloblastin		0.31643	0.725202
P54108	Cysteine-rich secretory protein 3		0.0603186	-2.10359	P54108	Cysteine-rich secretory protein 3	+	0.0323265	-0.922959	P54108	Cysteine-rich secretory protein 3	+	0.0147143	-3.59744	P54108	Cysteine-rich secretory protein 3		0.11222	-1.73323	P54108	Cysteine-rich secretory protein 3		0.841304	1.28694	P54108	Cysteine-rich secretory protein 3		0.618129	-1.2048	P54108	Cysteine-rich secretory protein 3		0.0629495	-1.69373	P54108	Cysteine-rich secretory protein 3	+	0.0270588	-2.64841	P54108	Cysteine-rich secretory protein 3		0.0978228	-1.04448	P54108	Cysteine-rich secretory protein 3	+	0.00540541	-3.25984
P80188	Neutrophil gelatinase-associated lipocalin	+	0.032233	-2.95528	P80188	Neutrophil gelatinase-associated lipocalin	+	0	-4.01465	P80188	Neutrophil gelatinase-associated lipocalin	+	0.014	-4.18495	P80188	Neutrophil gelatinase-associated lipocalin	+	0.00729412	-3.20773	P80188	Neutrophil gelatinase-associated lipocalin	+	0.0185882	-3.38772	P80188	Neutrophil gelatinase-associated lipocalin	+	0.0323871	-2.23557	P80188	Neutrophil gelatinase-associated lipocalin	+	0.0053913	-3.23458	P80188	Neutrophil gelatinase-associated lipocalin	+	0	-4.06084	P80188	Neutrophil gelatinase-associated lipocalin	+	0.02416	-2.0562	P80188	Neutrophil gelatinase-associated lipocalin	+	0.00469565	-3.99234
P01008	Antithrombin-III	+	0.0319231	-2.10339	P01008	Antithrombin-III	+	0	-2.50558	P01008	Antithrombin-III		0.211741	-2.44251	P01008	Antithrombin-III		0.114234	-2.24765	P01008	Antithrombin-III		0.0502051	-2.01433	P01008	Antithrombin-III		0.685788	0.322437	P01008	Antithrombin-III	+	0.0484632	-1.12357	P01008	Antithrombin-III	+	0	-2.45225	P01008	Antithrombin-III	+	0.0248	-1.6004	P01008	Antithrombin-III	+	0	-2.55782
P04004	Vitronectin	+	0.00483333	-2.49288	P04004	Vitronectin	+	0.00604878	-2.63529	P04004	Vitronectin	+	0.0213333	-3.02587	P04004	Vitronectin	+	0.0125333	-1.87902	P04004	Vitronectin	+	0.016	-1.91639	P04004	Vitronectin	+	0.0298667	-1.47905	P04004	Vitronectin	+	0.0092973	-1.97637	P04004	Vitronectin	+	0.0226032	-1.94898	P04004	Vitronectin		0.0596552	-0.986021	P04004	Vitronectin	+	0.00432	-2.64213
P02774	Vitamin D-binding protein	+	0.00284211	-4.49771	P02774	Vitamin D-binding protein	+	0.00442857	-3.77109	P02774	Vitamin D-binding protein	+	0.0112941	-4.66283	P02774	Vitamin D-binding protein	+	0.00953846	-2.82201	P02774	Vitamin D-binding protein	+	0.0143636	-2.85459	P02774	Vitamin D-binding protein		0.0659048	-2.03064	P02774	Vitamin D-binding protein	+	0.004	-3.15657	P02774	Vitamin D-binding protein	+	0	-2.92172	P02774	Vitamin D-binding protein	+	0.0103333	-2.227	P02774	Vitamin D-binding protein	+	0	-3.87359
P08123	Collagen alpha-2(I) chain	+	0	-2.56805	P08123	Collagen alpha-2(I) chain	+	0.00551111	-0.74192	P08123	Collagen alpha-2(I) chain	+	0.0154286	-2.87007	P08123	Collagen alpha-2(I) chain	+	0	-1.82506	P08123	Collagen alpha-2(I) chain	+	0.012	-1.87245	P08123	Collagen alpha-2(I) chain		0.0947606	-2.35475	P08123	Collagen alpha-2(I) chain	+	0.0168333	-1.92375	P08123	Collagen alpha-2(I) chain	+	0	3.21299	P08123	Collagen alpha-2(I) chain		0.198653	-0.469173	P08123	Collagen alpha-2(I) chain	+	0	-2.33205
P01591	Immunoglobulin J chain	+	0.011831	-3.3905	P01591	Immunoglobulin J chain	+	0.00476923	-5.75973	P01591	Immunoglobulin J chain	+	0.016	-6.00117	P01591	Immunoglobulin J chain	+	0	-5.00032	P01591	Immunoglobulin J chain	+	0.0158	-5.4417	P01591	Immunoglobulin J chain		0.0656522	-2.84416	P01591	Immunoglobulin J chain	+	0.00709677	-4.82943	P01591	Immunoglobulin J chain	+	0	-5.77664	P01591	Immunoglobulin J chain	+	0.0209412	-4.04148	P01591	Immunoglobulin J chain	+	0	-5.35782
P23280	Carbonic anhydrase 6		0.406892	-1.90109	P23280	Carbonic anhydrase 6		0.123026	-5.12511	P23280	Carbonic anhydrase 6		0.595821	-0.690171	P23280	Carbonic anhydrase 6		0.972086	-0.897969	P23280	Carbonic anhydrase 6		0.458244	-1.37128	P23280	Carbonic anhydrase 6		0.445274	-4.74907	P23280	Carbonic anhydrase 6		0.206667	-5.69542	P23280	Carbonic anhydrase 6		0.7772	-0.535546	P23280	Carbonic anhydrase 6		0.818788	-0.0791779	P23280	Carbonic anhydrase 6		0.986043	-1.21705
P52209	6-phosphogluconate dehydrogenase, decarboxylating	+	0.00308571	-2.96732	P52209	6-phosphogluconate dehydrogenase, decarboxylating	+	0.0062	-3.67045	P52209	6-phosphogluconate dehydrogenase, decarboxylating	+	0.0142069	-4.26472	P52209	6-phosphogluconate dehydrogenase, decarboxylating	+	0.0166667	-2.47681	P52209	6-phosphogluconate dehydrogenase, decarboxylating	+	0.0192941	-2.23327	P52209	6-phosphogluconate dehydrogenase, decarboxylating		0.0604	-3.41027	P52209	6-phosphogluconate dehydrogenase, decarboxylating	+	0.02295	-2.8303	P52209	6-phosphogluconate dehydrogenase, decarboxylating	+	0.0272778	-4.7832	P52209	6-phosphogluconate dehydrogenase, decarboxylating	+	0.0499556	-2.83363	P52209	6-phosphogluconate dehydrogenase, decarboxylating	+	0.0245238	-3.2315
P04114	Apolipoprotein B-100	+	0.004	-2.4811	P04114	Apolipoprotein B-100	+	0.00694118	-3.25434	P04114	Apolipoprotein B-100	+	0.016	-3.436	P04114	Apolipoprotein B-100	+	0.0315068	-2.08438	P04114	Apolipoprotein B-100	+	0.0105333	-2.41656	P04114	Apolipoprotein B-100		0.0629167	-2.35797	P04114	Apolipoprotein B-100	+	0.00611111	-1.99419	P04114	Apolipoprotein B-100	+	0.00432	-3.12258	P04114	Apolipoprotein B-100	+	0.0215714	-2.20955	P04114	Apolipoprotein B-100	+	0.00385714	-3.59815
P02452	Collagen alpha-1(I) chain	+	0.00385714	-3.04019	P02452	Collagen alpha-1(I) chain		0.844374	-0.276905	P02452	Collagen alpha-1(I) chain	+	0.0126	-3.25203	P02452	Collagen alpha-1(I) chain	+	0.0124528	-1.92735	P02452	Collagen alpha-1(I) chain	+	0.0131667	-2.31925	P02452	Collagen alpha-1(I) chain	+	0.0341176	-2.31916	P02452	Collagen alpha-1(I) chain	+	0.00516667	-3.13426	P02452	Collagen alpha-1(I) chain	+	0	3.56944	P02452	Collagen alpha-1(I) chain		0.412407	0.0325642	P02452	Collagen alpha-1(I) chain	+	0.00526316	-2.39404
P02533	Keratin, type I cytoskeletal 14	+	0	-4.86464	P02533	Keratin, type I cytoskeletal 14		0.0687547	-2.17253	P02533	Keratin, type I cytoskeletal 14		0.145942	-6.39612	P02533	Keratin, type I cytoskeletal 14		0.0663265	-4.86904	P02533	Keratin, type I cytoskeletal 14	+	0.0096	-5.7953	P02533	Keratin, type I cytoskeletal 14	+	0.032	-4.05662	P02533	Keratin, type I cytoskeletal 14	+	0.00459259	-4.27684	P02533	Keratin, type I cytoskeletal 14		0.197796	-2.11577	P02533	Keratin, type I cytoskeletal 14		0.408342	0.101723	P02533	Keratin, type I cytoskeletal 14	+	0.0265287	-5.17433
Q8TAX7	Mucin-7	+	0.0233708	-3.74071	Q8TAX7	Mucin-7	+	0.00496	-3.13539	Q8TAX7	Mucin-7	+	0.0151875	-3.8861	Q8TAX7	Mucin-7	+	0.0272	-2.06803	Q8TAX7	Mucin-7	+	0.0153469	-1.33241	Q8TAX7	Mucin-7		0.0615714	-1.19235	Q8TAX7	Mucin-7		0.06588	-2.18929	Q8TAX7	Mucin-7	+	0	-2.84707	Q8TAX7	Mucin-7	+	0	-3.11521	Q8TAX7	Mucin-7	+	0.0047619	-3.9271
P02671	Fibrinogen alpha chain	+	0.023908	-2.57686	P02671	Fibrinogen alpha chain	+	0.043604	0.943186	P02671	Fibrinogen alpha chain	+	0.0219429	-2.35218	P02671	Fibrinogen alpha chain	+	0.0128182	-1.90816	P02671	Fibrinogen alpha chain		0.0876087	-0.778117	P02671	Fibrinogen alpha chain		0.0972973	-0.638175	P02671	Fibrinogen alpha chain	+	0.00781818	-2.0216	P02671	Fibrinogen alpha chain	+	0	-1.90165	P02671	Fibrinogen alpha chain		0.0761212	0.474037	P02671	Fibrinogen alpha chain	+	0.0135385	-1.38016
P00558	Phosphoglycerate kinase 1	+	0.0316735	-1.90188	P00558	Phosphoglycerate kinase 1	+	0.00851429	-2.57659	P00558	Phosphoglycerate kinase 1	+	0.0112	-3.5153	P00558	Phosphoglycerate kinase 1	+	0.0257971	-1.79719	P00558	Phosphoglycerate kinase 1	+	0.0392778	-1.52554	P00558	Phosphoglycerate kinase 1	+	0.0331852	-1.62599	P00558	Phosphoglycerate kinase 1	+	0.0261364	-3.17184	P00558	Phosphoglycerate kinase 1		0.21101	-0.564327	P00558	Phosphoglycerate kinase 1		0.0797015	-1.83375	P00558	Phosphoglycerate kinase 1	+	0.02035	-1.5508
O75594	Peptidoglycan recognition protein 1		0.510748	-0.187473	O75594	Peptidoglycan recognition protein 1	+	0.0453333	-1.39743	O75594	Peptidoglycan recognition protein 1		0.259	1.68668	O75594	Peptidoglycan recognition protein 1		0.69814	0.0361023	O75594	Peptidoglycan recognition protein 1		0.396628	-0.619754	O75594	Peptidoglycan recognition protein 1	+	0.0335	4.35561	O75594	Peptidoglycan recognition protein 1	+	0.0394725	1.92916	O75594	Peptidoglycan recognition protein 1		0.472847	0.431376	O75594	Peptidoglycan recognition protein 1	+	0.0493953	4.62182	O75594	Peptidoglycan recognition protein 1	+	0.0497872	3.78969
P62805	Histone H4	+	0.0359238	-1.83679	P62805	Histone H4	+	0.0300211	-3.27687	P62805	Histone H4	+	0.0258082	-2.13144	P62805	Histone H4	+	0.01128	-1.98676	P62805	Histone H4		0.251423	-0.881944	P62805	Histone H4		0.411266	-2.13165	P62805	Histone H4		0.148973	-0.973245	P62805	Histone H4	+	0.0106667	1.17391	P62805	Histone H4		0.0697049	-1.39658	P62805	Histone H4		0.329691	-0.521909
Q6P5S2	Protein LEG1 homolog	+	0	-3.52554	Q6P5S2	Protein LEG1 homolog	+	0.00709434	-2.44789	Q6P5S2	Protein LEG1 homolog		0.0505778	-2.32693	Q6P5S2	Protein LEG1 homolog	+	0.0141818	-2.8511	Q6P5S2	Protein LEG1 homolog		0.384571	-0.631219	Q6P5S2	Protein LEG1 homolog		0.541686	-0.768332	Q6P5S2	Protein LEG1 homolog	+	0.0135	-2.31171	Q6P5S2	Protein LEG1 homolog	+	0	-4.18002	Q6P5S2	Protein LEG1 homolog		0.104296	-1.66625	Q6P5S2	Protein LEG1 homolog		0.053625	-1.56076
P02042	Hemoglobin subunit delta	+	0.00937931	-1.72106	P02042	Hemoglobin subunit delta	+	0.00375758	-2.7002	P02042	Hemoglobin subunit delta	+	0.00950943	-1.67747	P02042	Hemoglobin subunit delta	+	0.0169492	-1.48741	P02042	Hemoglobin subunit delta	+	0.0318033	-2.21066	P02042	Hemoglobin subunit delta		0.0709333	-1.51644	P02042	Hemoglobin subunit delta	+	0.00702041	-2.00679	P02042	Hemoglobin subunit delta	+	0.011125	-1.80773	P02042	Hemoglobin subunit delta		0.0966	-0.695607	P02042	Hemoglobin subunit delta	+	0.00587879	-2.61114
P02766	Transthyretin	+	0	-3.49685	P02766	Transthyretin	+	0.0107532	-2.16684	P02766	Transthyretin		0.707912	0.40743	P02766	Transthyretin		0.998638	1.51207	P02766	Transthyretin		0.0734884	-1.57304	P02766	Transthyretin		0.0626667	-1.97099	P02766	Transthyretin		0.0740392	-1.16493	P02766	Transthyretin		0.334654	-0.478651	P02766	Transthyretin		0.0569811	2.59246	P02766	Transthyretin		0.57713	-0.573381
P62937	Peptidyl-prolyl cis-trans isomerase A	+	0.00877419	-1.79441	P62937	Peptidyl-prolyl cis-trans isomerase A	+	0.00354286	-2.46858	P62937	Peptidyl-prolyl cis-trans isomerase A	+	0.0136216	-2.3502	P62937	Peptidyl-prolyl cis-trans isomerase A	+	0.0310811	-2.28208	P62937	Peptidyl-prolyl cis-trans isomerase A	+	0.0284286	-1.63167	P62937	Peptidyl-prolyl cis-trans isomerase A	+	0.0498	-1.32647	P62937	Peptidyl-prolyl cis-trans isomerase A	+	0.00839024	-1.95678	P62937	Peptidyl-prolyl cis-trans isomerase A		0.537073	-0.218938	P62937	Peptidyl-prolyl cis-trans isomerase A		0.111762	-1.59744	P62937	Peptidyl-prolyl cis-trans isomerase A	+	0.00384615	-2.09364
P02765	Alpha-2-HS-glycoprotein	+	0.00415385	-2.44623	P02765	Alpha-2-HS-glycoprotein	+	0	-3.89095	P02765	Alpha-2-HS-glycoprotein	+	0.0152593	-4.18957	P02765	Alpha-2-HS-glycoprotein	+	0.0111429	-1.70734	P02765	Alpha-2-HS-glycoprotein	+	0.032	-2.78232	P02765	Alpha-2-HS-glycoprotein		0.641175	-0.131486	P02765	Alpha-2-HS-glycoprotein	+	0.00733333	-2.86784	P02765	Alpha-2-HS-glycoprotein	+	0.027662	-1.20379	P02765	Alpha-2-HS-glycoprotein		0.0559259	-2.56313	P02765	Alpha-2-HS-glycoprotein	+	0.0045	-2.88226
P09211	Glutathione S-transferase P	+	0.003	-3.54461	P09211	Glutathione S-transferase P	+	0.012	-2.42762	P09211	Glutathione S-transferase P		0.372698	-0.179326	P09211	Glutathione S-transferase P		0.131009	-1.12462	P09211	Glutathione S-transferase P		0.0508571	-2.30013	P09211	Glutathione S-transferase P		0.0564878	-2.06839	P09211	Glutathione S-transferase P		0.24084	-2.44803	P09211	Glutathione S-transferase P		0.0560476	-4.10702	P09211	Glutathione S-transferase P	+	0.0237333	-3.19471	P09211	Glutathione S-transferase P		0.107964	-4.20997
P02743	Serum amyloid P-component	+	0.01185	-3.38992	P02743	Serum amyloid P-component	+	0.014439	-3.83282	P02743	Serum amyloid P-component	+	0.0288	-2.66709	P02743	Serum amyloid P-component	+	0.0457391	-3.03374	P02743	Serum amyloid P-component		0.142163	-3.14328	P02743	Serum amyloid P-component		0.0599231	-2.87155	P02743	Serum amyloid P-component	+	0.0226667	-2.97352	P02743	Serum amyloid P-component		0.0567229	-2.2524	P02743	Serum amyloid P-component		0.0927778	-2.38193	P02743	Serum amyloid P-component	+	0.048172	-3.12002
P02763	Alpha-1-acid glycoprotein 1		0.177032	-3.01474	P02763	Alpha-1-acid glycoprotein 1		0.0898739	-2.76445	P02763	Alpha-1-acid glycoprotein 1		0.374048	-1.9727	P02763	Alpha-1-acid glycoprotein 1		0.103886	-2.82008	P02763	Alpha-1-acid glycoprotein 1		0.0812444	-2.43354	P02763	Alpha-1-acid glycoprotein 1		0.28776	-3.17481	P02763	Alpha-1-acid glycoprotein 1		0.155821	-1.95441	P02763	Alpha-1-acid glycoprotein 1		0.333444	-1.87912	P02763	Alpha-1-acid glycoprotein 1		0.589516	-0.0384369	P02763	Alpha-1-acid glycoprotein 1		0.60497	-1.01211
P27105	Stomatin	+	0.022878	-2.01206	P27105	Stomatin	+	0.0231648	-1.99292	P27105	Stomatin	+	0.00969231	-3.33059	P27105	Stomatin	+	0.0269697	-2.83876	P27105	Stomatin	+	0.0163478	-2.0264	P27105	Stomatin		0.218085	-1.28837	P27105	Stomatin		0.0873905	-1.26068	P27105	Stomatin		0.113644	-3.45606	P27105	Stomatin		0.209765	-1.22935	P27105	Stomatin		0.72157	0.935787
P07737	Profilin-1	+	0	-3.32807	P07737	Profilin-1	+	0.00737255	-2.57098	P07737	Profilin-1	+	0.0114545	-2.86428	P07737	Profilin-1	+	0.013	-2.19256	P07737	Profilin-1	+	0.00929412	-2.15974	P07737	Profilin-1	+	0.0382857	-2.26197	P07737	Profilin-1	+	0.00496	-2.85366	P07737	Profilin-1	+	0.01544	-3.26461	P07737	Profilin-1	+	0.02225	-3.36174	P07737	Profilin-1	+	0	-3.95754
P11142	Heat shock cognate 71 kDa protein	+	0.0328713	-2.89912	P11142	Heat shock cognate 71 kDa protein	+	0.0236854	-3.00785	P11142	Heat shock cognate 71 kDa protein	+	0.0276667	-4.22669	P11142	Heat shock cognate 71 kDa protein		0.5064	-1.00739	P11142	Heat shock cognate 71 kDa protein	+	0.0179048	-1.57317	P11142	Heat shock cognate 71 kDa protein	+	0.0349565	-1.81567	P11142	Heat shock cognate 71 kDa protein	+	0.0350222	-3.55708	P11142	Heat shock cognate 71 kDa protein		0.175032	-0.813015	P11142	Heat shock cognate 71 kDa protein		0.257271	-0.349724	P11142	Heat shock cognate 71 kDa protein	+	0.00348387	-3.3648
P13727	Bone marrow proteoglycan		0.171174	-2.54963	P13727	Bone marrow proteoglycan		0.569248	-0.512876	P13727	Bone marrow proteoglycan		0.0511461	-1.9458	P13727	Bone marrow proteoglycan		0.07152	-0.939678	P13727	Bone marrow proteoglycan	+	0.0388571	0.726115	P13727	Bone marrow proteoglycan		0.70006	-0.417866	P13727	Bone marrow proteoglycan		1	0.318509	P13727	Bone marrow proteoglycan		0.772	0.125127	P13727	Bone marrow proteoglycan		0.297431	0.693061	P13727	Bone marrow proteoglycan		0.363097	-1.18974
P01011	Alpha-1-antichymotrypsin	+	0.00539535	-2.55134	P01011	Alpha-1-antichymotrypsin	+	0.00696296	-2.41266	P01011	Alpha-1-antichymotrypsin	+	0.0107234	-1.66945	P01011	Alpha-1-antichymotrypsin	+	0.00688889	-2.67554	P01011	Alpha-1-antichymotrypsin	+	0.0174884	-1.83005	P01011	Alpha-1-antichymotrypsin		0.0616327	-1.09044	P01011	Alpha-1-antichymotrypsin	+	0.00758621	-2.59494	P01011	Alpha-1-antichymotrypsin	+	0.0123077	-3.02451	P01011	Alpha-1-antichymotrypsin		0.152128	-1.65517	P01011	Alpha-1-antichymotrypsin	+	0.0129444	-3.30171
P10909	Clusterin	+	0	-3.05832	P10909	Clusterin	+	0	-4.51306	P10909	Clusterin	+	0.0164746	-3.29436	P10909	Clusterin	+	0.0062	-3.84007	P10909	Clusterin	+	0.0175556	-3.76271	P10909	Clusterin	+	0.032	-2.81382	P10909	Clusterin	+	0.00442857	-2.71414	P10909	Clusterin	+	0.00469565	-2.27932	P10909	Clusterin	+	0.0155	-3.47648	P10909	Clusterin	+	0	-4.7519
Q9HD89	Resistin		0.515939	1.79887	Q9HD89	Resistin	+	0.00635897	-1.34742	Q9HD89	Resistin		0.0986939	5.53789	Q9HD89	Resistin	+	0	3.89265	Q9HD89	Resistin	+	0.01375	1.94891	Q9HD89	Resistin		0.286735	4.64407	Q9HD89	Resistin	+	0	3.44304	Q9HD89	Resistin		0.21	1.80358	Q9HD89	Resistin		0.820489	-0.434586	Q9HD89	Resistin		0.45137	3.50348
P15153	Ras-related C3 botulinum toxin substrate 2	+	0.00836923	-2.10724	P15153	Ras-related C3 botulinum toxin substrate 2	+	0.00576744	-3.3182	P15153	Ras-related C3 botulinum toxin substrate 2	+	0.0144	-3.11752	P15153	Ras-related C3 botulinum toxin substrate 2	+	0.0053913	-2.52408	P15153	Ras-related C3 botulinum toxin substrate 2	+	0.0153171	-1.72954	P15153	Ras-related C3 botulinum toxin substrate 2	+	0.0495	-1.66636	P15153	Ras-related C3 botulinum toxin substrate 2	+	0.00590476	-2.87297	P15153	Ras-related C3 botulinum toxin substrate 2	+	0	-3.03206	P15153	Ras-related C3 botulinum toxin substrate 2		0.05856	-2.37098	P15153	Ras-related C3 botulinum toxin substrate 2	+	0.004	-2.15389
P25705	ATP synthase subunit alpha, mitochondrial	+	0.00493617	-4.60293	P25705	ATP synthase subunit alpha, mitochondrial	+	0.0142651	-3.55428	P25705	ATP synthase subunit alpha, mitochondrial	+	0.0122927	-4.31239	P25705	ATP synthase subunit alpha, mitochondrial	+	0.0206769	-3.80167	P25705	ATP synthase subunit alpha, mitochondrial	+	0.0269831	-3.03522	P25705	ATP synthase subunit alpha, mitochondrial		0.0734194	-4.07757	P25705	ATP synthase subunit alpha, mitochondrial	+	0.00625455	-4.08984	P25705	ATP synthase subunit alpha, mitochondrial		0.2992	-1.20642	P25705	ATP synthase subunit alpha, mitochondrial		0.0990769	-1.99011	P25705	ATP synthase subunit alpha, mitochondrial	+	0.00528571	-4.09714
P31025	Lipocalin-1	+	0.0461071	-5.6599	P31025	Lipocalin-1	+	0.00506122	-5.16659	P31025	Lipocalin-1		0.323443	-1.57281	P31025	Lipocalin-1	+	0.0311169	-6.00289	P31025	Lipocalin-1		0.382267	-0.800004	P31025	Lipocalin-1		0.4445	-0.346045	P31025	Lipocalin-1	+	0.0243294	-4.44778	P31025	Lipocalin-1		0.15413	-1.33245	P31025	Lipocalin-1		0.961928	0.937662	P31025	Lipocalin-1	+	0.0363478	-5.19641
P23528	Cofilin-1	+	0	-5.11582	P23528	Cofilin-1	+	0.0198588	-5.28843	P23528	Cofilin-1	+	0.0132903	-3.75593	P23528	Cofilin-1		0.0656566	-1.89874	P23528	Cofilin-1		0.145293	-1.64758	P23528	Cofilin-1	+	0.0553333	-3.05055	P23528	Cofilin-1	+	0.008	-3.89209	P23528	Cofilin-1		0.296377	-1.20513	P23528	Cofilin-1		0.141826	-2.39103	P23528	Cofilin-1		0.10537	-1.87276
P49913	Cathelicidin antimicrobial peptide	+	0.032	-0.791415	P49913	Cathelicidin antimicrobial peptide		0.509129	0.397425	P49913	Cathelicidin antimicrobial peptide	+	0.0114182	-0.605813	P49913	Cathelicidin antimicrobial peptide		0.208479	-0.78631	P49913	Cathelicidin antimicrobial peptide		0.914446	-0.260319	P49913	Cathelicidin antimicrobial peptide		0.117215	1.32352	P49913	Cathelicidin antimicrobial peptide		0.876551	0.371528	P49913	Cathelicidin antimicrobial peptide		0.502545	0.195572	P49913	Cathelicidin antimicrobial peptide		0.372821	0.36485	P49913	Cathelicidin antimicrobial peptide		0.437746	-0.125625
P02652	Apolipoprotein A-II	+	0.0432727	-2.54869	P02652	Apolipoprotein A-II		0.78858	-0.328444	P02652	Apolipoprotein A-II		0.0709474	1.65866	P02652	Apolipoprotein A-II		0.919319	1.47891	P02652	Apolipoprotein A-II		0.835824	0.954662	P02652	Apolipoprotein A-II	+	0.048	2.32575	P02652	Apolipoprotein A-II		0.0747723	-1.7177	P02652	Apolipoprotein A-II	+	0.0229677	1.88424	P02652	Apolipoprotein A-II		0.709056	1.9302	P02652	Apolipoprotein A-II	+	0.0163038	-1.37484
P05107	Integrin beta-2		0.113966	-0.643764	P05107	Integrin beta-2		0.243607	-0.62086	P05107	Integrin beta-2	+	0.0309767	-1.12772	P05107	Integrin beta-2	+	0.0159298	-0.661183	P05107	Integrin beta-2		0.245682	-0.441879	P05107	Integrin beta-2		0.414222	-0.0066433	P05107	Integrin beta-2	+	0.00747826	-1.22518	P05107	Integrin beta-2		0.0813636	-1.07676	P05107	Integrin beta-2		0.0513333	-1.00714	P05107	Integrin beta-2		0.0587071	-1.26974
P40199	Carcinoembryonic antigen-related cell adhesion molecule 6	+	0.00263415	-3.36291	P40199	Carcinoembryonic antigen-related cell adhesion molecule 6	+	0.0146173	-3.96906	P40199	Carcinoembryonic antigen-related cell adhesion molecule 6	+	0.0102857	-3.26104	P40199	Carcinoembryonic antigen-related cell adhesion molecule 6		0.921206	1.13635	P40199	Carcinoembryonic antigen-related cell adhesion molecule 6	+	0.00810256	-2.881	P40199	Carcinoembryonic antigen-related cell adhesion molecule 6	+	0.0322222	-4.21369	P40199	Carcinoembryonic antigen-related cell adhesion molecule 6	+	0.0153239	-3.70698	P40199	Carcinoembryonic antigen-related cell adhesion molecule 6	+	0.0118667	-3.86876	P40199	Carcinoembryonic antigen-related cell adhesion molecule 6	+	0.024	-4.0466	P40199	Carcinoembryonic antigen-related cell adhesion molecule 6	+	0.00454545	-3.67051
P08729	Keratin, type II cytoskeletal 7	+	0.00922034	-2.90837	P08729	Keratin, type II cytoskeletal 7	+	0.00648276	-4.0425	P08729	Keratin, type II cytoskeletal 7		0.050022	-2.92421	P08729	Keratin, type II cytoskeletal 7	+	0.0132308	-3.35698	P08729	Keratin, type II cytoskeletal 7	+	0.0395758	-2.86156	P08729	Keratin, type II cytoskeletal 7	+	0.0402	-3.1215	P08729	Keratin, type II cytoskeletal 7	+	0.0264368	-2.43357	P08729	Keratin, type II cytoskeletal 7	+	0.0214615	-2.5762	P08729	Keratin, type II cytoskeletal 7		0.094961	-2.1748	P08729	Keratin, type II cytoskeletal 7	+	0.00465116	-3.21393
P15515	Histatin-1	+	0	-2.53579	P15515	Histatin-1		0.109754	-0.4122	P15515	Histatin-1	+	0.0271707	-2.64746	P15515	Histatin-1		0.17513	-0.30251	P15515	Histatin-1		0.598543	0.445415	P15515	Histatin-1		0.458	-0.513597	P15515	Histatin-1	+	0.0157681	-2.09555	P15515	Histatin-1	+	0.0237857	-1.96878	P15515	Histatin-1	+	0.0287273	-0.921222	P15515	Histatin-1	+	0.0137143	-1.39267
P31949	Protein S100-A11		0.163367	-2.2104	P31949	Protein S100-A11		0.652182	0.321888	P31949	Protein S100-A11	+	0.0156774	-2.17974	P31949	Protein S100-A11		0.420903	-0.724248	P31949	Protein S100-A11		0.751723	-0.122403	P31949	Protein S100-A11		0.301725	-2.51346	P31949	Protein S100-A11		0.545375	-1.59688	P31949	Protein S100-A11		0.616598	-1.12282	P31949	Protein S100-A11		0.160653	-3.60752	P31949	Protein S100-A11		0.151115	-3.30665
P10599	Thioredoxin		0.765059	-0.406782	P10599	Thioredoxin		0.710104	-1.18424	P10599	Thioredoxin		0.506376	-0.711337	P10599	Thioredoxin	+	0.0315181	-2.24347	P10599	Thioredoxin		0.05425	-1.32693	P10599	Thioredoxin		0.302416	-1.2591	P10599	Thioredoxin		0.399556	-3.28437	P10599	Thioredoxin	+	0.00568421	-2.4967	P10599	Thioredoxin		0.738331	-0.649162	P10599	Thioredoxin		0.147712	-3.36408
P08493	Matrix Gla protein	+	0.008	-2.34517	P08493	Matrix Gla protein	+	0.00715152	0.854188	P08493	Matrix Gla protein	+	0.0247895	-2.72008	P08493	Matrix Gla protein		0.729692	1.0183	P08493	Matrix Gla protein		0.457387	-0.648508	P08493	Matrix Gla protein		0.541433	-0.239604	P08493	Matrix Gla protein	+	0.00649057	-2.29594	P08493	Matrix Gla protein	+	0.030961	-2.58491	P08493	Matrix Gla protein		0.158167	-0.731403	P08493	Matrix Gla protein	+	0.00415385	-2.7139
P00751	Complement factor B	+	0.00785965	-4.00957	P00751	Complement factor B	+	0.0242299	-4.43758	P00751	Complement factor B	+	0.0166316	-4.87345	P00751	Complement factor B	+	0.0319467	-3.09681	P00751	Complement factor B	+	0.00831579	-3.39086	P00751	Complement factor B	+	0.0524211	-2.83554	P00751	Complement factor B	+	0.0258427	-3.40431	P00751	Complement factor B	+	0.0122759	-4.32733	P00751	Complement factor B		0.0563077	-3.74597	P00751	Complement factor B	+	0.005	-4.34234
P01860	Immunoglobulin heavy constant gamma 3		0.0597895	-1.66906	P01860	Immunoglobulin heavy constant gamma 3	+	0.00590476	-4.02382	P01860	Immunoglobulin heavy constant gamma 3	+	0.0137333	-3.42778	P01860	Immunoglobulin heavy constant gamma 3	+	0.0145185	-2.58851	P01860	Immunoglobulin heavy constant gamma 3		0.115362	-3.19124	P01860	Immunoglobulin heavy constant gamma 3		0.0947429	-2.16414	P01860	Immunoglobulin heavy constant gamma 3		0.205635	0.534554	P01860	Immunoglobulin heavy constant gamma 3		0.165574	-1.83671	P01860	Immunoglobulin heavy constant gamma 3		0.96458	0.418401	P01860	Immunoglobulin heavy constant gamma 3		0.0805283	-2.11318
P05090	Apolipoprotein D	+	0.00348387	-1.89896	P05090	Apolipoprotein D	+	0	-3.86181	P05090	Apolipoprotein D	+	0	-2.3927	P05090	Apolipoprotein D	+	0	-2.27594	P05090	Apolipoprotein D	+	0.0106667	-3.00263	P05090	Apolipoprotein D	+	0.0213333	-2.71152	P05090	Apolipoprotein D	+	0.0130909	-2.40805	P05090	Apolipoprotein D	+	0.0138776	-4.85605	P05090	Apolipoprotein D	+	0.0137778	-3.15421	P05090	Apolipoprotein D	+	0.003375	-2.64734
P01033	Metalloproteinase inhibitor 1	+	0.00437736	-3.15346	P01033	Metalloproteinase inhibitor 1		0.067581	-1.33502	P01033	Metalloproteinase inhibitor 1	+	0.0216338	-2.40166	P01033	Metalloproteinase inhibitor 1	+	0.0295802	-2.47101	P01033	Metalloproteinase inhibitor 1		0.0713333	-2.08908	P01033	Metalloproteinase inhibitor 1		0.061098	-1.95864	P01033	Metalloproteinase inhibitor 1	+	0.0221205	-2.69438	P01033	Metalloproteinase inhibitor 1	+	0.00936842	-3.71525	P01033	Metalloproteinase inhibitor 1	+	0.0344865	-3.11587	P01033	Metalloproteinase inhibitor 1	+	0.003	-3.64931
P0DOX8	Immunoglobulin lambda-1 light chain	+	0.008	-3.10489	P0DOX8	Immunoglobulin lambda-1 light chain	+	0.0140952	-3.45603	P0DOX8	Immunoglobulin lambda-1 light chain	+	0.0128	-4.70645	P0DOX8	Immunoglobulin lambda-1 light chain	+	0.00590476	-4.51518	P0DOX8	Immunoglobulin lambda-1 light chain	+	0.0274483	-3.00655	P0DOX8	Immunoglobulin lambda-1 light chain		0.0643721	-2.14136	P0DOX8	Immunoglobulin lambda-1 light chain	+	0.00882051	-4.35847	P0DOX8	Immunoglobulin lambda-1 light chain	+	0.0269041	-5.24959	P0DOX8	Immunoglobulin lambda-1 light chain		0.0571636	-2.4041	P0DOX8	Immunoglobulin lambda-1 light chain	+	0.00568421	-5.86402
P01619	Immunoglobulin kappa variable 3-20	+	0.00527273	-3.36225	P01619	Immunoglobulin kappa variable 3-20	+	0	-3.15696	P01619	Immunoglobulin kappa variable 3-20	+	0.0150476	-2.18883	P01619	Immunoglobulin kappa variable 3-20	+	0.0127407	-2.22344	P01619	Immunoglobulin kappa variable 3-20	+	0.0192	-3.65281	P01619	Immunoglobulin kappa variable 3-20		0.480235	-0.404096	P01619	Immunoglobulin kappa variable 3-20	+	0.00652632	-3.39399	P01619	Immunoglobulin kappa variable 3-20	+	0	-2.93202	P01619	Immunoglobulin kappa variable 3-20	+	0.0266667	-1.87331	P01619	Immunoglobulin kappa variable 3-20	+	0.00469841	-3.16081
P41218	Myeloid cell nuclear differentiation antigen	+	0.00824242	-2.04478	P41218	Myeloid cell nuclear differentiation antigen	+	0	-2.46777	P41218	Myeloid cell nuclear differentiation antigen		0.146431	-1.19081	P41218	Myeloid cell nuclear differentiation antigen		0.0556129	0.46099	P41218	Myeloid cell nuclear differentiation antigen	+	0.01264	-1.25618	P41218	Myeloid cell nuclear differentiation antigen		0.169767	-1.87846	P41218	Myeloid cell nuclear differentiation antigen		0.62955	-0.579561	P41218	Myeloid cell nuclear differentiation antigen	+	0.0045	-2.56866	P41218	Myeloid cell nuclear differentiation antigen		0.0711746	-1.10289	P41218	Myeloid cell nuclear differentiation antigen	+	0.00327273	-1.66343
P07996	Thrombospondin-1	+	0	-4.31249	P07996	Thrombospondin-1		0.17122	-0.331106	P07996	Thrombospondin-1	+	0.012	-3.16092	P07996	Thrombospondin-1	+	0.0114146	-2.62096	P07996	Thrombospondin-1	+	0.0401846	-2.13613	P07996	Thrombospondin-1	+	0.0308966	-2.0579	P07996	Thrombospondin-1	+	0.00716667	-2.12292	P07996	Thrombospondin-1	+	0.0176471	-1.90654	P07996	Thrombospondin-1	+	0.0389474	-2.07447	P07996	Thrombospondin-1		0.0605098	-2.32556
P23284	Peptidyl-prolyl cis-trans isomerase B		0.285125	-2.30657	P23284	Peptidyl-prolyl cis-trans isomerase B	+	0.0246882	-3.42486	P23284	Peptidyl-prolyl cis-trans isomerase B		0.226836	-1.4729	P23284	Peptidyl-prolyl cis-trans isomerase B		0.277884	-0.973893	P23284	Peptidyl-prolyl cis-trans isomerase B		0.270071	-2.01785	P23284	Peptidyl-prolyl cis-trans isomerase B		0.464239	2.48619	P23284	Peptidyl-prolyl cis-trans isomerase B		0.809774	1.66941	P23284	Peptidyl-prolyl cis-trans isomerase B		0.984555	0.952583	P23284	Peptidyl-prolyl cis-trans isomerase B		0.934941	2.27551	P23284	Peptidyl-prolyl cis-trans isomerase B		0.472375	0.947552
P25815	Protein S100-P	+	0.0295914	-3.23009	P25815	Protein S100-P	+	0	-4.46552	P25815	Protein S100-P		0.309076	-1.22117	P25815	Protein S100-P		0.12986	-4.17392	P25815	Protein S100-P		0.0549367	0.847539	P25815	Protein S100-P		0.968835	1.33774	P25815	Protein S100-P	+	0.0077193	1.43194	P25815	Protein S100-P		0.0576	-4.69814	P25815	Protein S100-P	+	0.0274545	-3.49244	P25815	Protein S100-P		0.165719	-4.97726
P06870	Kallikrein-1	+	0.0236364	-1.8723	P06870	Kallikrein-1	+	0.00496	-2.54885	P06870	Kallikrein-1		0.0702083	-2.29597	P06870	Kallikrein-1	+	0	-2.66359	P06870	Kallikrein-1	+	0.0170909	-3.30471	P06870	Kallikrein-1	+	0.0267692	-2.44152	P06870	Kallikrein-1	+	0.00745763	-1.88116	P06870	Kallikrein-1	+	0.00962162	-3.62687	P06870	Kallikrein-1		0.465	0.624654	P06870	Kallikrein-1	+	0.00444444	-2.57074
P10153	Non-secretory ribonuclease		0.593895	-0.411874	P10153	Non-secretory ribonuclease	+	0.00427586	-2.56496	P10153	Non-secretory ribonuclease		0.158057	-1.05147	P10153	Non-secretory ribonuclease		0.996714	-0.651728	P10153	Non-secretory ribonuclease	+	0.0414603	1.0602	P10153	Non-secretory ribonuclease		0.988199	-0.0734291	P10153	Non-secretory ribonuclease		0.823045	1.70254	P10153	Non-secretory ribonuclease		0.951081	0.683032	P10153	Non-secretory ribonuclease		0.978326	1.1744	P10153	Non-secretory ribonuclease		0.175138	-0.229019
P05546	Heparin cofactor 2	+	0.0410741	-2.04465	P05546	Heparin cofactor 2		0.232331	-0.184806	P05546	Heparin cofactor 2		0.959773	-0.735261	P05546	Heparin cofactor 2	+	0.0122609	-2.15056	P05546	Heparin cofactor 2		0.988085	0.419482	P05546	Heparin cofactor 2		0.221684	1.80212	P05546	Heparin cofactor 2		0.70342	1.66882	P05546	Heparin cofactor 2		0.192833	-1.95998	P05546	Heparin cofactor 2		0.854418	-0.0196047	P05546	Heparin cofactor 2		0.65397	-0.65916
O00299	Chloride intracellular channel protein 1	+	0.00863492	-4.10686	O00299	Chloride intracellular channel protein 1	+	0.00413333	-4.4683	O00299	Chloride intracellular channel protein 1	+	0	-4.38064	O00299	Chloride intracellular channel protein 1	+	0.00885714	-2.42661	O00299	Chloride intracellular channel protein 1	+	0.0137143	-3.72922	O00299	Chloride intracellular channel protein 1		0.0986301	-3.52906	O00299	Chloride intracellular channel protein 1	+	0	-3.87375	O00299	Chloride intracellular channel protein 1	+	0	-3.40932	O00299	Chloride intracellular channel protein 1	+	0.0112727	-4.97062	O00299	Chloride intracellular channel protein 1	+	0	-5.57965
P06331	Immunoglobulin heavy variable 4-34		0.0993448	-1.17275	P06331	Immunoglobulin heavy variable 4-34	+	0.00938667	-3.38886	P06331	Immunoglobulin heavy variable 4-34		0.0730309	-1.91802	P06331	Immunoglobulin heavy variable 4-34		0.0573617	-2.04908	P06331	Immunoglobulin heavy variable 4-34		0.116295	-1.76233	P06331	Immunoglobulin heavy variable 4-34		0.679815	-1.15785	P06331	Immunoglobulin heavy variable 4-34	+	0.00785714	-2.30943	P06331	Immunoglobulin heavy variable 4-34	+	0.0104706	-2.64245	P06331	Immunoglobulin heavy variable 4-34		0.517803	-0.474926	P06331	Immunoglobulin heavy variable 4-34		0.0541895	-2.63859
P08758	Annexin A5	+	0.00464	-3.73996	P08758	Annexin A5	+	0	-4.17044	P08758	Annexin A5	+	0.012875	-3.95092	P08758	Annexin A5	+	0.014625	-4.43947	P08758	Annexin A5	+	0.0146667	-2.65535	P08758	Annexin A5		0.0743125	-2.73887	P08758	Annexin A5	+	0	-3.87355	P08758	Annexin A5	+	0	-4.83552	P08758	Annexin A5	+	0.0262609	-3.18134	P08758	Annexin A5	+	0	-4.98751
P28799	Progranulin	+	0.0355849	-2.33267	P28799	Progranulin		0.0699813	-1.61099	P28799	Progranulin	+	0.0142941	-3.0166	P28799	Progranulin		0.113259	-2.99996	P28799	Progranulin	+	0.0403871	-2.69227	P28799	Progranulin		0.288444	-0.972239	P28799	Progranulin		0.0635918	-2.04879	P28799	Progranulin		0.0558519	-2.1418	P28799	Progranulin		0.133644	-1.90845	P28799	Progranulin	+	0.0235181	-3.11836
P59666	Neutrophil defensin 3		0.12605	2.68806	P59666	Neutrophil defensin 3		0.140444	2.19348	P59666	Neutrophil defensin 3		0.349452	2.70904	P59666	Neutrophil defensin 3		0.10149	1.79449	P59666	Neutrophil defensin 3		0.422787	2.0021	P59666	Neutrophil defensin 3		0.103579	2.31157	P59666	Neutrophil defensin 3		0.337728	0.728654	P59666	Neutrophil defensin 3		0.656469	-0.369737	P59666	Neutrophil defensin 3		0.256926	-0.17174	P59666	Neutrophil defensin 3		0.902906	0.443623
P02461	Collagen alpha-1(III) chain	+	0.0273478	-3.288	P02461	Collagen alpha-1(III) chain	+	0.00516667	-3.1803	P02461	Collagen alpha-1(III) chain	+	0.01648	-3.20572	P02461	Collagen alpha-1(III) chain	+	0.0167143	-1.96356	P02461	Collagen alpha-1(III) chain	+	0.00854054	-2.51169	P02461	Collagen alpha-1(III) chain	+	0.0316364	-2.02421	P02461	Collagen alpha-1(III) chain	+	0.00427586	-2.95875	P02461	Collagen alpha-1(III) chain	+	0.0117073	1.97133	P02461	Collagen alpha-1(III) chain		0.372708	-1.6507	P02461	Collagen alpha-1(III) chain	+	0.00372414	-3.15852
P81605	Dermcidin	+	0	-2.59049	P81605	Dermcidin	+	0.00652632	-3.96042	P81605	Dermcidin	+	0.012	-6.01747	P81605	Dermcidin	+	0.0156	-2.64455	P81605	Dermcidin	+	0.009875	-4.62983	P81605	Dermcidin		0.0642553	-3.9086	P81605	Dermcidin	+	0	-5.16572	P81605	Dermcidin	+	0.0225763	-3.45211	P81605	Dermcidin	+	0.00953846	-2.06532	P81605	Dermcidin	+	0	-3.71008
P14174	Macrophage migration inhibitory factor		0.625493	1.55139	P14174	Macrophage migration inhibitory factor	+	0.0053913	-2.86199	P14174	Macrophage migration inhibitory factor		0.386457	-1.13803	P14174	Macrophage migration inhibitory factor	+	0.00775	2.74805	P14174	Macrophage migration inhibitory factor		0.598688	3.33206	P14174	Macrophage migration inhibitory factor		0.662406	-2.3637	P14174	Macrophage migration inhibitory factor		0.460126	2.87234	P14174	Macrophage migration inhibitory factor	+	0.0114839	2.34563	P14174	Macrophage migration inhibitory factor	+	0.00885714	3.24464	P14174	Macrophage migration inhibitory factor	+	0.01408	-2.80524
P02760	Protein AMBP	+	0.00291892	-4.66906	P02760	Protein AMBP	+	0.00683636	-3.90676	P02760	Protein AMBP	+	0.0254595	-4.43443	P02760	Protein AMBP	+	0.014	-3.16636	P02760	Protein AMBP	+	0.0189231	-2.67045	P02760	Protein AMBP		0.0892754	-2.1495	P02760	Protein AMBP	+	0.0062	-4.78714	P02760	Protein AMBP	+	0.0101714	-3.71736	P02760	Protein AMBP		0.0772923	-3.65871	P02760	Protein AMBP	+	0.00363636	-3.78665
P43490	Nicotinamide phosphoribosyltransferase		0.0943304	-5.54	P43490	Nicotinamide phosphoribosyltransferase		0.0819817	-4.0764	P43490	Nicotinamide phosphoribosyltransferase		0.213248	-5.32859	P43490	Nicotinamide phosphoribosyltransferase		0.226373	-4.96208	P43490	Nicotinamide phosphoribosyltransferase		0.789802	-1.07542	P43490	Nicotinamide phosphoribosyltransferase		0.696448	-0.953251	P43490	Nicotinamide phosphoribosyltransferase		0.330179	-3.20826	P43490	Nicotinamide phosphoribosyltransferase		0.19534	-3.62054	P43490	Nicotinamide phosphoribosyltransferase		0.133538	-4.78773	P43490	Nicotinamide phosphoribosyltransferase		0.2674	-2.54901
P26641	Elongation factor 1-gamma	+	0.0124737	-6.00955	P26641	Elongation factor 1-gamma		0.925914	-0.0914497	P26641	Elongation factor 1-gamma		0.111556	-4.14811	P26641	Elongation factor 1-gamma		0.1295	-6.41961	P26641	Elongation factor 1-gamma		0.342838	-3.86223	P26641	Elongation factor 1-gamma		0.116154	-4.5918	P26641	Elongation factor 1-gamma		0.665815	-1.04491	P26641	Elongation factor 1-gamma		0.161634	-5.76004	P26641	Elongation factor 1-gamma		0.321081	-4.96987	P26641	Elongation factor 1-gamma		0.089271	-5.47384
[truncated: 35 more columns]
