# Supplementary material
Source: Research Square preprint supplement (doi:10.21203/rs.3.rs-8967608/v1)
Supplement: Supplementary file 3 [file b5e97ba6332c731a02a25081.xlsx]

## Sheet: Arkusz1
Table S1. Results of quantitative proteomic analysis of each sialolith sample (control: saliva from patients with sialolithiasis (pooled))
salivary stone #1 vs saliva from patients with sialolithiasis (pool)					salivary stone #2 vs saliva from patients with sialolithiasis (pool)					salivary stone #3 vs saliva from patients with sialolithiasis (pool)					salivary stone #4 vs saliva from patients with sialolithiasis (pool)					salivary stone #5 vs saliva from patients with sialolithiasis (pool)					salivary stone #6 vs saliva from patients with sialolithiasis (pool)					salivary stone #A vs saliva from patients with sialolithiasis (pool)					salivary stone #B vs saliva from patients with sialolithiasis (pool)					salivary stone #C vs saliva from patients with sialolithiasis (pool)					salivary stone #D vs saliva from patients with sialolithiasis (pool)
Accession	Protein	Significance	p-value	log2(Fold Change)	Accession	Protein	Significance	p-value	log2(Fold Change)	Accession	Protein	Significance	p-value	log2(Fold Change)	Accession	Protein	Significance	p-value	log2(Fold Change)	Accession	Protein	Significance	p-value	log2(Fold Change)	Accession	Protein	Significance	p-value	log2(Fold Change)	Accession	Protein	Significance	p-value	log2(Fold Change)	Accession	Protein	Significance	p-value	log2(Fold Change)	Accession	Protein	Significance	p-value	log2(Fold Change)	Accession	Protein	Significance	p-value	log2(Fold Change)
P02788	Lactotransferrin	+	0	-1.26495	P02788	Lactotransferrin	+	0	-1.88396	P02788	Lactotransferrin	+	0	-3.21509	P02788	Lactotransferrin	+	0.0177959	-1.20861	P02788	Lactotransferrin	+	0.0121455	0.186987	P02788	Lactotransferrin		0.102033	-0.807611	P02788	Lactotransferrin	+	0.01	0.435217	P02788	Lactotransferrin	+	0	-2.31588	P02788	Lactotransferrin	+	0	-1.70929	P02788	Lactotransferrin		0.907942	0.117981
P02768	Albumin	+	0.00737778	-1.25559	P02768	Albumin	+	0	-1.76624	P02768	Albumin		0.0698182	-2.80465	P02768	Albumin	+	0	-1.43135	P02768	Albumin	+	0.00911111	-1.48496	P02768	Albumin	+	0.0454857	-0.865238	P02768	Albumin	+	0	-0.733534	P02768	Albumin	+	0.0264	-0.771759	P02768	Albumin		0.156691	-0.282574	P02768	Albumin	+	0.0126809	-1.03676
P05164	Myeloperoxidase	+	0.0149333	2.07019	P05164	Myeloperoxidase	+	0	-2.76859	P05164	Myeloperoxidase		0.886365	-0.617998	P05164	Myeloperoxidase		0.155657	-0.414541	P05164	Myeloperoxidase		0.843387	-0.421181	P05164	Myeloperoxidase		0.238708	0.40929	P05164	Myeloperoxidase	+	0	1.3847	P05164	Myeloperoxidase	+	0.0235745	-1.01972	P05164	Myeloperoxidase		0.239692	0.314007	P05164	Myeloperoxidase	+	0.00771429	2.07797
P19013	Keratin, type II cytoskeletal 4	+	0.00851282	-4.87515	P19013	Keratin, type II cytoskeletal 4	+	0.0261031	-4.40958	P19013	Keratin, type II cytoskeletal 4	+	0.0155	-3.13539	P19013	Keratin, type II cytoskeletal 4	+	0.0315616	-2.48055	P19013	Keratin, type II cytoskeletal 4	+	0.00758621	-4.08291	P19013	Keratin, type II cytoskeletal 4		0.107175	-2.29384	P19013	Keratin, type II cytoskeletal 4	+	0.00892308	-3.54768	P19013	Keratin, type II cytoskeletal 4		0.681206	0.800274	P19013	Keratin, type II cytoskeletal 4	+	0.0156667	-3.56686	P19013	Keratin, type II cytoskeletal 4	+	0.012	-5.32865
Q9HC84	Mucin-5B	+	0.0276706	-3.19851	Q9HC84	Mucin-5B	+	0.00632727	-2.4773	Q9HC84	Mucin-5B		0.898935	-0.167352	Q9HC84	Mucin-5B		0.1078	-0.623574	Q9HC84	Mucin-5B		0.460367	0.120536	Q9HC84	Mucin-5B		0.58995	0.578189	Q9HC84	Mucin-5B	+	0.0415217	-1.70753	Q9HC84	Mucin-5B		0.17108	-0.845044	Q9HC84	Mucin-5B		0.0830286	-2.23741	Q9HC84	Mucin-5B	+	0.0121404	-3.55177
P01024	Complement C3	+	0.0224	-1.72162	P01024	Complement C3	+	0	-2.59074	P01024	Complement C3	+	0.0157966	-1.7121	P01024	Complement C3	+	0.0189565	-1.04985	P01024	Complement C3	+	0	-1.77554	P01024	Complement C3	+	0.0276364	-1.53072	P01024	Complement C3	+	0	-1.76073	P01024	Complement C3	+	0.024087	-2.34633	P01024	Complement C3	+	0.0125333	-1.75716	P01024	Complement C3	+	0.0154286	-2.33086
P02808	Statherin	+	0.0122222	-2.28909	P02808	Statherin	+	0.00785714	-1.06168	P02808	Statherin	+	0.0168525	-2.82625	P02808	Statherin		0.0536818	-0.976944	P02808	Statherin		0.969114	-0.239099	P02808	Statherin		0.398752	0.609052	P02808	Statherin		0.132107	-0.436217	P02808	Statherin	+	0.00933333	-1.43005	P02808	Statherin		0.570102	0.297033	P02808	Statherin		0.0672381	-1.78176
P02787	Serotransferrin	+	0.0113793	-2.03979	P02787	Serotransferrin		0.191528	-0.685256	P02787	Serotransferrin		0.238055	-2.22223	P02787	Serotransferrin		0.179963	-1.53351	P02787	Serotransferrin	+	0.0498	-1.92426	P02787	Serotransferrin		0.965229	-0.229965	P02787	Serotransferrin		0.24729	-0.926836	P02787	Serotransferrin	+	0.00905882	-1.61014	P02787	Serotransferrin		0.666387	-0.327185	P02787	Serotransferrin	+	0.0117612	-2.0633
P15924	Desmoplakin		0.510344	0.0809298	P15924	Desmoplakin		0.80365	0.940078	P15924	Desmoplakin		0.107636	-1.24428	P15924	Desmoplakin		0.301261	-1.22659	P15924	Desmoplakin		0.646831	-0.446248	P15924	Desmoplakin		0.520513	1.78568	P15924	Desmoplakin		0.731941	0.127712	P15924	Desmoplakin		0.176225	1.24162	P15924	Desmoplakin		0.647574	2.56185	P15924	Desmoplakin	+	0.0233882	-1.27597
P0DUB6	Alpha-amylase 1A		0.0696381	-1.70785	P0DUB6	Alpha-amylase 1A	+	0.0138667	-0.908332	P0DUB6	Alpha-amylase 1A	+	0.0212222	-1.14137	P0DUB6	Alpha-amylase 1A		0.354906	-0.780493	P0DUB6	Alpha-amylase 1A		0.242505	-1.22717	P0DUB6	Alpha-amylase 1A		0.963449	-0.276218	P0DUB6	Alpha-amylase 1A	+	0.0426	-0.828094	P0DUB6	Alpha-amylase 1A		0.682176	0.239613	P0DUB6	Alpha-amylase 1A		0.401982	-0.181812	P0DUB6	Alpha-amylase 1A	+	0.0363711	-0.559096
P68871	Hemoglobin subunit beta	+	0.0138333	-2.53916	P68871	Hemoglobin subunit beta		0.9128	1.82027	P68871	Hemoglobin subunit beta	+	0	-1.44489	P68871	Hemoglobin subunit beta	+	0.00413333	-1.58118	P68871	Hemoglobin subunit beta	+	0	2.09241	P68871	Hemoglobin subunit beta		0.212286	1.24162	P68871	Hemoglobin subunit beta	+	0.00791111	2.63807	P68871	Hemoglobin subunit beta		0.547267	3.28562	P68871	Hemoglobin subunit beta		0.990525	-1.23159	P68871	Hemoglobin subunit beta		0.857333	2.42759
P13646	Keratin, type I cytoskeletal 13	+	0.0110667	-2.77374	P13646	Keratin, type I cytoskeletal 13	+	0.005	-2.73948	P13646	Keratin, type I cytoskeletal 13	+	0.0171333	-2.41404	P13646	Keratin, type I cytoskeletal 13	+	0.0203636	-1.49364	P13646	Keratin, type I cytoskeletal 13	+	0.0082	-1.89754	P13646	Keratin, type I cytoskeletal 13		0.395444	-2.04709	P13646	Keratin, type I cytoskeletal 13	+	0.00302439	-2.49024	P13646	Keratin, type I cytoskeletal 13	+	0.0237692	2.39096	P13646	Keratin, type I cytoskeletal 13	+	0.03424	-2.3079	P13646	Keratin, type I cytoskeletal 13	+	0.00897778	-2.51662
P61626	Lysozyme C	+	0.0338105	0.882456	P61626	Lysozyme C	+	0	5.273	P61626	Lysozyme C	+	0.0297436	-1.05323	P61626	Lysozyme C		0.693054	-0.0114861	P61626	Lysozyme C	+	0	2.77943	P61626	Lysozyme C	+	0.0103333	2.08694	P61626	Lysozyme C	+	0	2.69369	P61626	Lysozyme C		0.528407	0.346214	P61626	Lysozyme C		0.101867	1.32241	P61626	Lysozyme C		0.958894	0.799788
P01023	Alpha-2-macroglobulin		0.344419	-0.234813	P01023	Alpha-2-macroglobulin	+	0.0090411	-1.6424	P01023	Alpha-2-macroglobulin		0.523219	-0.202667	P01023	Alpha-2-macroglobulin		0.332531	-0.490657	P01023	Alpha-2-macroglobulin		0.291478	-0.558731	P01023	Alpha-2-macroglobulin		0.965669	0.089119	P01023	Alpha-2-macroglobulin		0.831014	0.0632334	P01023	Alpha-2-macroglobulin		0.204553	-1.00626	P01023	Alpha-2-macroglobulin		0.877672	0.31359	P01023	Alpha-2-macroglobulin	+	0.0317419	-1.42594
P69905	Hemoglobin subunit alpha	+	0.0174737	-2.2269	P69905	Hemoglobin subunit alpha	+	0	-3.1465	P69905	Hemoglobin subunit alpha	+	0.0186667	-3.52056	P69905	Hemoglobin subunit alpha	+	0.0215385	-2.77136	P69905	Hemoglobin subunit alpha	+	0.0104615	-1.24664	P69905	Hemoglobin subunit alpha	+	0.0228571	-2.25655	P69905	Hemoglobin subunit alpha	+	0.00979104	-1.28023	P69905	Hemoglobin subunit alpha	+	0.0184	-1.98119	P69905	Hemoglobin subunit alpha	+	0.0449565	0.791906	P69905	Hemoglobin subunit alpha	+	0.00760976	-1.86821
P08311	Cathepsin G		0.9626	-0.65324	P08311	Cathepsin G	+	0.0253474	-1.60961	P08311	Cathepsin G		0.518803	-1.67688	P08311	Cathepsin G		0.408426	-0.544374	P08311	Cathepsin G		0.288667	-0.42009	P08311	Cathepsin G		0.216225	0.426302	P08311	Cathepsin G	+	0.0331905	1.00209	P08311	Cathepsin G		0.82103	-0.659348	P08311	Cathepsin G		0.216091	2.4969	P08311	Cathepsin G	+	0.0354043	2.06486
P0DOX5	Immunoglobulin gamma-1 heavy chain		0.30452	-1.33551	P0DOX5	Immunoglobulin gamma-1 heavy chain	+	0	-3.82579	P0DOX5	Immunoglobulin gamma-1 heavy chain	+	0.0179231	-1.7295	P0DOX5	Immunoglobulin gamma-1 heavy chain	+	0.0207407	-1.8612	P0DOX5	Immunoglobulin gamma-1 heavy chain	+	0.00814815	-2.23893	P0DOX5	Immunoglobulin gamma-1 heavy chain		0.107582	-3.59313	P0DOX5	Immunoglobulin gamma-1 heavy chain	+	0	-3.25256	P0DOX5	Immunoglobulin gamma-1 heavy chain	+	0.0109	-3.87044	P0DOX5	Immunoglobulin gamma-1 heavy chain	+	0.0426154	-2.6622	P0DOX5	Immunoglobulin gamma-1 heavy chain	+	0.0121633	-2.42356
P01876	Immunoglobulin heavy constant alpha 1		0.959716	-0.18303	P01876	Immunoglobulin heavy constant alpha 1		0.0928739	-2.18154	P01876	Immunoglobulin heavy constant alpha 1		0.304209	-1.01688	P01876	Immunoglobulin heavy constant alpha 1		0.0858557	-0.72501	P01876	Immunoglobulin heavy constant alpha 1		0.0659765	-2.41983	P01876	Immunoglobulin heavy constant alpha 1		0.751344	-0.0739918	P01876	Immunoglobulin heavy constant alpha 1		0.0768932	-0.690929	P01876	Immunoglobulin heavy constant alpha 1	+	0.0326761	-0.834133	P01876	Immunoglobulin heavy constant alpha 1		0.384838	-0.172874	P01876	Immunoglobulin heavy constant alpha 1	+	0.00821053	-1.23219
P01833	Polymeric immunoglobulin receptor		0.216746	-3.31205	P01833	Polymeric immunoglobulin receptor	+	0	-2.52864	P01833	Polymeric immunoglobulin receptor		0.527907	-0.288884	P01833	Polymeric immunoglobulin receptor	+	0.0425185	-1.73639	P01833	Polymeric immunoglobulin receptor		0.212713	0.787693	P01833	Polymeric immunoglobulin receptor		0.15835	-1.29121	P01833	Polymeric immunoglobulin receptor	+	0.0100923	-1.45587	P01833	Polymeric immunoglobulin receptor		0.13478	-1.25337	P01833	Polymeric immunoglobulin receptor		0.31128	-1.79864	P01833	Polymeric immunoglobulin receptor		0.29859	-0.357858
P20160	Azurocidin	+	0.0161096	1.547	P20160	Azurocidin		0.0741261	-0.5105	P20160	Azurocidin		0.237222	0.794815	P20160	Azurocidin	+	0.0439524	1.22761	P20160	Azurocidin		0.207619	-0.214125	P20160	Azurocidin		0.210747	1.10427	P20160	Azurocidin	+	0.0324186	1.30717	P20160	Azurocidin		0.415107	-0.250206	P20160	Azurocidin	+	0.0459556	1.56666	P20160	Azurocidin	+	0.0115333	1.7312
P01037	Cystatin-SN	+	0.0308046	-2.24378	P01037	Cystatin-SN	+	0.00354286	-2.51268	P01037	Cystatin-SN	+	0	-1.88804	P01037	Cystatin-SN	+	0	-2.22523	P01037	Cystatin-SN		0.389695	0.2292	P01037	Cystatin-SN	+	0.0197778	-1.47549	P01037	Cystatin-SN		0.34768	-1.34579	P01037	Cystatin-SN	+	0.0062	-2.04772	P01037	Cystatin-SN		0.118053	-2.06082	P01037	Cystatin-SN	+	0.0119394	-2.44787
P08779	Keratin, type I cytoskeletal 16		0.223405	-2.76797	P08779	Keratin, type I cytoskeletal 16	+	0.0279184	-1.21531	P08779	Keratin, type I cytoskeletal 16		0.314724	-3.12164	P08779	Keratin, type I cytoskeletal 16	+	0.0289577	-1.87299	P08779	Keratin, type I cytoskeletal 16		0.1672	-0.424496	P08779	Keratin, type I cytoskeletal 16	+	0	1.98702	P08779	Keratin, type I cytoskeletal 16		0.245984	-1.31112	P08779	Keratin, type I cytoskeletal 16		0.598602	-1.64603	P08779	Keratin, type I cytoskeletal 16	+	0.045561	-1.07376	P08779	Keratin, type I cytoskeletal 16	+	0.0116863	-2.28287
P0C0L4	Complement C4-A	+	0.0118571	-3.82279	P0C0L4	Complement C4-A	+	0.0088	-3.66617	P0C0L4	Complement C4-A	+	0.0165806	-2.95411	P0C0L4	Complement C4-A	+	0.0211321	-2.151	P0C0L4	Complement C4-A	+	0.050137	-1.18931	P0C0L4	Complement C4-A	+	0.0137778	-3.0789	P0C0L4	Complement C4-A	+	0.042375	-3.80769	P0C0L4	Complement C4-A	+	0.0230476	-1.86459	P0C0L4	Complement C4-A		0.0520645	-2.97625	P0C0L4	Complement C4-A	+	0.0113443	-3.48898
P06702	Protein S100-A9		0.880941	0.47944	P06702	Protein S100-A9	+	0.011814	-1.47543	P06702	Protein S100-A9		0.743821	0.571439	P06702	Protein S100-A9		0.613323	0.781327	P06702	Protein S100-A9		0.514754	-0.245297	P06702	Protein S100-A9		0.778758	1.52312	P06702	Protein S100-A9		0.591725	0.438827	P06702	Protein S100-A9		0.916119	-0.435836	P06702	Protein S100-A9		0.240826	2.29521	P06702	Protein S100-A9		0.401984	0.567203
P04264	Keratin, type II cytoskeletal 1	+	0.0294505	-1.22475	P04264	Keratin, type II cytoskeletal 1	+	0.0412453	-1.27122	P04264	Keratin, type II cytoskeletal 1	+	0.0147619	-2.0055	P04264	Keratin, type II cytoskeletal 1	+	0.00375758	3.19097	P04264	Keratin, type II cytoskeletal 1		0.291221	1.04132	P04264	Keratin, type II cytoskeletal 1		0.979603	1.46912	P04264	Keratin, type II cytoskeletal 1		0.151368	-0.402658	P04264	Keratin, type II cytoskeletal 1	+	0.0288235	-1.41068	P04264	Keratin, type II cytoskeletal 1		0.0544727	-2.14362	P04264	Keratin, type II cytoskeletal 1		0.0546535	-1.15874
P02814	Submaxillary gland androgen-regulated protein 3B	+	0.014	-5.88784	P02814	Submaxillary gland androgen-regulated protein 3B	+	0	-5.72033	P02814	Submaxillary gland androgen-regulated protein 3B	+	0	-5.48222	P02814	Submaxillary gland androgen-regulated protein 3B	+	0	-5.56252	P02814	Submaxillary gland androgen-regulated protein 3B	+	0.011	-5.19722	P02814	Submaxillary gland androgen-regulated protein 3B	+	0	-4.52207	P02814	Submaxillary gland androgen-regulated protein 3B	+	0	-5.36491	P02814	Submaxillary gland androgen-regulated protein 3B	+	0	-7.29048	P02814	Submaxillary gland androgen-regulated protein 3B	+	0	-5.902	P02814	Submaxillary gland androgen-regulated protein 3B	+	0	-6.36454
P04083	Annexin A1	+	0	-3.23657	P04083	Annexin A1	+	0	-3.10542	P04083	Annexin A1	+	0	-3.13747	P04083	Annexin A1	+	0.0302154	-1.3936	P04083	Annexin A1	+	0	-1.8275	P04083	Annexin A1		0.216264	-0.229714	P04083	Annexin A1	+	0.00909804	-1.88235	P04083	Annexin A1	+	0.0106207	-3.77657	P04083	Annexin A1		0.381248	-2.68156	P04083	Annexin A1	+	0.009	-3.09776
P05109	Protein S100-A8		0.16393	5.49082	P05109	Protein S100-A8		0.624776	0.172615	P05109	Protein S100-A8		0.245982	6.21039	P05109	Protein S100-A8	+	0	4.8771	P05109	Protein S100-A8	+	0	3.84138	P05109	Protein S100-A8		0.115405	4.13418	P05109	Protein S100-A8	+	0	3.78717	P05109	Protein S100-A8		0.221388	4.08356	P05109	Protein S100-A8		0.83209	-1.33224	P05109	Protein S100-A8		0.322016	4.85298
P13647	Keratin, type II cytoskeletal 5	+	0.010375	-2.67542	P13647	Keratin, type II cytoskeletal 5		0.0532222	-1.10437	P13647	Keratin, type II cytoskeletal 5	+	0.0203478	-3.23809	P13647	Keratin, type II cytoskeletal 5		0.716585	0.199604	P13647	Keratin, type II cytoskeletal 5		0.614762	0.0841408	P13647	Keratin, type II cytoskeletal 5		0.878311	0.362033	P13647	Keratin, type II cytoskeletal 5	+	0.00576744	-2.04785	P13647	Keratin, type II cytoskeletal 5		0.208083	4.928	P13647	Keratin, type II cytoskeletal 5		0.366196	-2.49572	P13647	Keratin, type II cytoskeletal 5		0.0901682	-1.44085
Q6MZM9	Proline-rich protein 27	+	0.0452525	-2.02102	Q6MZM9	Proline-rich protein 27	+	0.00656604	-3.75307	Q6MZM9	Proline-rich protein 27	+	0.01864	-3.00546	Q6MZM9	Proline-rich protein 27	+	0.042	-1.15789	Q6MZM9	Proline-rich protein 27	+	0.0131525	-1.90193	Q6MZM9	Proline-rich protein 27		0.213822	-0.61023	Q6MZM9	Proline-rich protein 27	+	0.0410753	-1.54909	Q6MZM9	Proline-rich protein 27	+	0.0111795	-2.79505	Q6MZM9	Proline-rich protein 27		0.247785	-0.802533	Q6MZM9	Proline-rich protein 27	+	0.0211707	-1.48688
P13645	Keratin, type I cytoskeletal 10	+	0.0127692	-2.60998	P13645	Keratin, type I cytoskeletal 10	+	0.0213043	-1.67096	P13645	Keratin, type I cytoskeletal 10		0.190377	-2.17552	P13645	Keratin, type I cytoskeletal 10	+	0.0190244	1.19122	P13645	Keratin, type I cytoskeletal 10		0.115284	-0.404552	P13645	Keratin, type I cytoskeletal 10		0.0529412	-0.578215	P13645	Keratin, type I cytoskeletal 10	+	0	-1.2877	P13645	Keratin, type I cytoskeletal 10	+	0.0295429	-1.34414	P13645	Keratin, type I cytoskeletal 10		0.0526102	-2.18374	P13645	Keratin, type I cytoskeletal 10	+	0.0156842	-2.16268
P08246	Neutrophil elastase	+	0.0124444	-1.98487	P08246	Neutrophil elastase	+	0	-2.82456	P08246	Neutrophil elastase	+	0.0166429	-2.33227	P08246	Neutrophil elastase	+	0.02	-2.78257	P08246	Neutrophil elastase	+	0.00886486	-1.829	P08246	Neutrophil elastase	+	0.0310968	-1.90575	P08246	Neutrophil elastase		0.884851	0.331327	P08246	Neutrophil elastase		0.0770909	-1.05202	P08246	Neutrophil elastase	+	0.0490909	-2.27032	P08246	Neutrophil elastase	+	0.0112453	-1.22304
P02675	Fibrinogen beta chain	+	0.0115789	-1.21705	P02675	Fibrinogen beta chain		0.0911186	0.996628	P02675	Fibrinogen beta chain		0.1144	-2.56741	P02675	Fibrinogen beta chain	+	0	-1.73266	P02675	Fibrinogen beta chain		0.614336	0.320211	P02675	Fibrinogen beta chain		0.5785	-1.53369	P02675	Fibrinogen beta chain		0.836	0.271473	P02675	Fibrinogen beta chain		0.417649	-0.512947	P02675	Fibrinogen beta chain	+	0	2.92144	P02675	Fibrinogen beta chain		0.124536	-0.505831
P35579	Myosin-9		0.109455	-2.95405	P35579	Myosin-9	+	0.00948148	-4.54682	P35579	Myosin-9		0.0901075	-2.85494	P35579	Myosin-9		0.175849	-2.44815	P35579	Myosin-9		0.0998667	-2.9409	P35579	Myosin-9		0.493204	-1.74648	P35579	Myosin-9		0.0806154	-3.02575	P35579	Myosin-9		0.258275	-2.37829	P35579	Myosin-9		0.253137	-2.49381	P35579	Myosin-9		0.093963	-2.77296
P01009	Alpha-1-antitrypsin	+	0.00948571	-3.14193	P01009	Alpha-1-antitrypsin	+	0.00997403	-1.09158	P01009	Alpha-1-antitrypsin		0.173654	-0.625839	P01009	Alpha-1-antitrypsin	+	0	-1.6414	P01009	Alpha-1-antitrypsin	+	0.0481159	-1.1726	P01009	Alpha-1-antitrypsin		0.124263	-0.512338	P01009	Alpha-1-antitrypsin	+	0	-1.49114	P01009	Alpha-1-antitrypsin	+	0.0129524	-1.58148	P01009	Alpha-1-antitrypsin	+	0	-1.93898	P01009	Alpha-1-antitrypsin	+	0.018	-2.40709
P35908	Keratin, type II cytoskeletal 2 epidermal	+	0.0107097	-3.12178	P35908	Keratin, type II cytoskeletal 2 epidermal	+	0.00488889	-3.01329	P35908	Keratin, type II cytoskeletal 2 epidermal	+	0.00775	-3.33417	P35908	Keratin, type II cytoskeletal 2 epidermal	+	0.00459259	-2.94885	P35908	Keratin, type II cytoskeletal 2 epidermal	+	0.0127213	-2.82604	P35908	Keratin, type II cytoskeletal 2 epidermal	+	0.0488333	-1.88057	P35908	Keratin, type II cytoskeletal 2 epidermal	+	0.00757447	-2.65416	P35908	Keratin, type II cytoskeletal 2 epidermal		0.0540822	-2.63052	P35908	Keratin, type II cytoskeletal 2 epidermal	+	0.041037	-2.30794	P35908	Keratin, type II cytoskeletal 2 epidermal	+	0.0100645	-3.40552
P30740	Leukocyte elastase inhibitor	+	0.00891667	-1.57438	P30740	Leukocyte elastase inhibitor	+	0	-2.618	P30740	Leukocyte elastase inhibitor	+	0.0155758	-1.53295	P30740	Leukocyte elastase inhibitor	+	0.0211525	-1.15318	P30740	Leukocyte elastase inhibitor	+	0.008	-2.4101	P30740	Leukocyte elastase inhibitor		0.109352	-0.546479	P30740	Leukocyte elastase inhibitor	+	0	-1.48445	P30740	Leukocyte elastase inhibitor		0.241624	-0.43115	P30740	Leukocyte elastase inhibitor		0.0512381	-1.13435	P30740	Leukocyte elastase inhibitor	+	0.015493	-2.84307
P35527	Keratin, type I cytoskeletal 9	+	0.0166842	-1.6475	P35527	Keratin, type I cytoskeletal 9	+	0.00458333	-2.4608	P35527	Keratin, type I cytoskeletal 9	+	0.016069	-1.69108	P35527	Keratin, type I cytoskeletal 9	+	0.020459	2.20158	P35527	Keratin, type I cytoskeletal 9	+	0.00713043	-1.10138	P35527	Keratin, type I cytoskeletal 9		0.0832982	-0.894328	P35527	Keratin, type I cytoskeletal 9		0.205017	-1.88073	P35527	Keratin, type I cytoskeletal 9	+	0.0233208	-2.75463	P35527	Keratin, type I cytoskeletal 9	+	0	-1.38882	P35527	Keratin, type I cytoskeletal 9	+	0.00675	-2.40655
P02810	Salivary acidic proline-rich phosphoprotein 1/2	+	0.01568	-2.45337	P02810	Salivary acidic proline-rich phosphoprotein 1/2	+	0	-2.03042	P02810	Salivary acidic proline-rich phosphoprotein 1/2	+	0	-2.8804	P02810	Salivary acidic proline-rich phosphoprotein 1/2	+	0	-1.56362	P02810	Salivary acidic proline-rich phosphoprotein 1/2	+	0	3.62642	P02810	Salivary acidic proline-rich phosphoprotein 1/2	+	0.0154667	1.26574	P02810	Salivary acidic proline-rich phosphoprotein 1/2	+	0	-1.39727	P02810	Salivary acidic proline-rich phosphoprotein 1/2		0.177556	-0.753281	P02810	Salivary acidic proline-rich phosphoprotein 1/2	+	0.043	-1.15197	P02810	Salivary acidic proline-rich phosphoprotein 1/2	+	0.027	-2.7132
P07355	Annexin A2	+	0.0172308	-3.80417	P07355	Annexin A2	+	0.004	-3.63762	P07355	Annexin A2	+	0	-4.48833	P07355	Annexin A2	+	0.0193103	-2.67996	P07355	Annexin A2	+	0.006875	-3.14902	P07355	Annexin A2	+	0.00953846	-2.85161	P07355	Annexin A2	+	0	-2.4753	P07355	Annexin A2	+	0	-2.5575	P07355	Annexin A2		0.103444	-1.12738	P07355	Annexin A2	+	0.00878261	-3.50865
P02647	Apolipoprotein A-I	+	0.0165634	-2.25175	P02647	Apolipoprotein A-I	+	0.00868421	-3.34148	P02647	Apolipoprotein A-I	+	0.0130526	-3.49417	P02647	Apolipoprotein A-I	+	0.0302778	-1.95941	P02647	Apolipoprotein A-I		0.116375	-1.2004	P02647	Apolipoprotein A-I		0.213835	-0.775356	P02647	Apolipoprotein A-I	+	0.0109333	-2.56646	P02647	Apolipoprotein A-I	+	0.0268889	-2.51328	P02647	Apolipoprotein A-I		0.0658235	-1.58133	P02647	Apolipoprotein A-I	+	0.0117288	-3.39234
P00738	Haptoglobin	+	0.0206154	-1.87629	P00738	Haptoglobin	+	0.0354231	-1.79654	P00738	Haptoglobin		0.69903	-1.43129	P00738	Haptoglobin		0.218218	-0.885044	P00738	Haptoglobin		0.744356	-0.298085	P00738	Haptoglobin		0.29099	-0.959146	P00738	Haptoglobin	+	0.0179459	-2.08552	P00738	Haptoglobin		0.862597	-0.809585	P00738	Haptoglobin		0.225888	1.78146	P00738	Haptoglobin		0.060233	-1.98596
P12273	Prolactin-inducible protein	+	0.0268571	-1.4791	P12273	Prolactin-inducible protein	+	0.0281584	-1.26528	P12273	Prolactin-inducible protein		0.696241	-0.64251	P12273	Prolactin-inducible protein		0.0665217	-1.86331	P12273	Prolactin-inducible protein		0.162505	-2.45669	P12273	Prolactin-inducible protein		0.103733	-1.73318	P12273	Prolactin-inducible protein		0.096717	-2.63473	P12273	Prolactin-inducible protein		0.324792	0.49884	P12273	Prolactin-inducible protein		0.829405	-0.100172	P12273	Prolactin-inducible protein	+	0.0221429	-3.06328
P04406	Glyceraldehyde-3-phosphate dehydrogenase	+	0.00873469	-3.60024	P04406	Glyceraldehyde-3-phosphate dehydrogenase	+	0	-4.42249	P04406	Glyceraldehyde-3-phosphate dehydrogenase	+	0.0293158	-3.50659	P04406	Glyceraldehyde-3-phosphate dehydrogenase	+	0.00994286	-2.592	P04406	Glyceraldehyde-3-phosphate dehydrogenase	+	0.0119286	-1.17759	P04406	Glyceraldehyde-3-phosphate dehydrogenase	+	0.0444848	-1.45185	P04406	Glyceraldehyde-3-phosphate dehydrogenase	+	0	-4.00142	P04406	Glyceraldehyde-3-phosphate dehydrogenase		0.353556	-0.472146	P04406	Glyceraldehyde-3-phosphate dehydrogenase	+	0.0256	-2.95794	P04406	Glyceraldehyde-3-phosphate dehydrogenase	+	0.02055	-1.70893
P03973	Antileukoproteinase		0.888058	1.16718	P03973	Antileukoproteinase		0.20475	-0.889192	P03973	Antileukoproteinase	+	0	-4.16284	P03973	Antileukoproteinase	+	0.004	-1.60125	P03973	Antileukoproteinase		0.105043	-0.951006	P03973	Antileukoproteinase		0.219652	-0.134694	P03973	Antileukoproteinase	+	0	-1.12438	P03973	Antileukoproteinase		0.705669	-1.45405	P03973	Antileukoproteinase		0.823939	-0.685956	P03973	Antileukoproteinase		0.251563	-1.77666
P25311	Zinc-alpha-2-glycoprotein	+	0.0463762	-1.60296	P25311	Zinc-alpha-2-glycoprotein	+	0.0140225	-3.08994	P25311	Zinc-alpha-2-glycoprotein	+	0.0443373	-2.306	P25311	Zinc-alpha-2-glycoprotein	+	0.0456471	-2.39607	P25311	Zinc-alpha-2-glycoprotein		0.287286	-1.09375	P25311	Zinc-alpha-2-glycoprotein		0.337714	-2.07757	P25311	Zinc-alpha-2-glycoprotein		0.122198	-2.09586	P25311	Zinc-alpha-2-glycoprotein		0.23508	-2.51312	P25311	Zinc-alpha-2-glycoprotein		0.381538	-0.862596	P25311	Zinc-alpha-2-glycoprotein	+	0.0214321	-2.41533
Q96DA0	Pancreatic adenocarcinoma up-regulated factor		0.885748	-0.206429	Q96DA0	Pancreatic adenocarcinoma up-regulated factor		0.124397	-0.787339	Q96DA0	Pancreatic adenocarcinoma up-regulated factor	+	0.0301728	-1.69758	Q96DA0	Pancreatic adenocarcinoma up-regulated factor	+	0.041494	-2.69253	Q96DA0	Pancreatic adenocarcinoma up-regulated factor		0.527645	-0.477066	Q96DA0	Pancreatic adenocarcinoma up-regulated factor		0.109212	-1.55111	Q96DA0	Pancreatic adenocarcinoma up-regulated factor		0.158365	0.557222	Q96DA0	Pancreatic adenocarcinoma up-regulated factor		0.799163	0.162434	Q96DA0	Pancreatic adenocarcinoma up-regulated factor		0.180286	-1.03756	Q96DA0	Pancreatic adenocarcinoma up-regulated factor	+	0.030913	-2.96509
P04040	Catalase	+	0.00856	-4.03398	P04040	Catalase	+	0.00936585	-4.00735	P04040	Catalase	+	0.0158154	-3.4727	P04040	Catalase	+	0.0181667	-3.24615	P04040	Catalase	+	0.0500267	-2.16938	P04040	Catalase		0.488877	-0.555655	P04040	Catalase	+	0.0434694	-3.77409	P04040	Catalase	+	0.0254737	-3.57801	P04040	Catalase		0.0535172	-2.65207	P04040	Catalase		0.235017	-1.82422
Q04695	Keratin, type I cytoskeletal 17		0.111964	-0.433353	Q04695	Keratin, type I cytoskeletal 17		0.0758584	-3.12486	Q04695	Keratin, type I cytoskeletal 17		0.0948511	-2.1728	Q04695	Keratin, type I cytoskeletal 17		0.0813333	-0.668756	Q04695	Keratin, type I cytoskeletal 17		0.26455	-0.599198	Q04695	Keratin, type I cytoskeletal 17		0.403418	0.795129	Q04695	Keratin, type I cytoskeletal 17		0.674165	0.12639	Q04695	Keratin, type I cytoskeletal 17		0.969209	0.371625	Q04695	Keratin, type I cytoskeletal 17		0.71616	-0.430723	Q04695	Keratin, type I cytoskeletal 17	+	0.04248	-2.99024
Q9UGM3	Scavenger receptor cysteine-rich domain-containing protein DMBT1		0.0765283	-1.59717	Q9UGM3	Scavenger receptor cysteine-rich domain-containing protein DMBT1	+	0.0250833	-2.32453	Q9UGM3	Scavenger receptor cysteine-rich domain-containing protein DMBT1		0.103429	-1.69665	Q9UGM3	Scavenger receptor cysteine-rich domain-containing protein DMBT1		0.0604944	-2.47896	Q9UGM3	Scavenger receptor cysteine-rich domain-containing protein DMBT1		0.0603415	-1.70144	Q9UGM3	Scavenger receptor cysteine-rich domain-containing protein DMBT1		0.486817	0.767876	Q9UGM3	Scavenger receptor cysteine-rich domain-containing protein DMBT1		0.398173	-1.07513	Q9UGM3	Scavenger receptor cysteine-rich domain-containing protein DMBT1		0.0781053	-2.10761	Q9UGM3	Scavenger receptor cysteine-rich domain-containing protein DMBT1		0.386631	-0.739321	Q9UGM3	Scavenger receptor cysteine-rich domain-containing protein DMBT1	+	0.00635294	-4.19596
P12724	Eosinophil cationic protein	+	0.0158095	2.97858	P12724	Eosinophil cationic protein	+	0.0077193	2.35956	P12724	Eosinophil cationic protein	+	0.0178723	1.50168	P12724	Eosinophil cationic protein	+	0	4.98137	P12724	Eosinophil cationic protein	+	0	5.25969	P12724	Eosinophil cationic protein	+	0.0124	3.87631	P12724	Eosinophil cationic protein	+	0	4.54152	P12724	Eosinophil cationic protein		0.261204	0.698346	P12724	Eosinophil cationic protein	+	0	2.70454	P12724	Eosinophil cationic protein	+	0.0135	3.77354
P17213	Bactericidal permeability-increasing protein	+	0	-5.2539	P17213	Bactericidal permeability-increasing protein	+	0	-4.35423	P17213	Bactericidal permeability-increasing protein	+	0	-3.98109	P17213	Bactericidal permeability-increasing protein	+	0	-4.04031	P17213	Bactericidal permeability-increasing protein	+	0	-2.99569	P17213	Bactericidal permeability-increasing protein		0.1096	-1.57204	P17213	Bactericidal permeability-increasing protein	+	0	-3.05729	P17213	Bactericidal permeability-increasing protein	+	0.00563636	-4.91708	P17213	Bactericidal permeability-increasing protein	+	0.0522581	-2.23558	P17213	Bactericidal permeability-increasing protein	+	0.00975	-2.79764
P59665	Neutrophil defensin 1	+	0.0172941	-3.58171	P59665	Neutrophil defensin 1		0.089265	-3.00827	P59665	Neutrophil defensin 1		0.0833043	-3.70641	P59665	Neutrophil defensin 1	+	0.0357949	-2.32017	P59665	Neutrophil defensin 1		0.270126	-1.44642	P59665	Neutrophil defensin 1		0.0791273	-2.55339	P59665	Neutrophil defensin 1	+	0.0430303	-1.99762	P59665	Neutrophil defensin 1	+	0.00864	-4.46895	P59665	Neutrophil defensin 1		0.0751884	-2.69923	P59665	Neutrophil defensin 1	+	0.0224096	-2.85713
Q8NFU4	Follicular dendritic cell secreted peptide	+	0.0124528	-3.99483	Q8NFU4	Follicular dendritic cell secreted peptide	+	0.00335135	-4.20723	Q8NFU4	Follicular dendritic cell secreted peptide	+	0.0301299	-4.43032	Q8NFU4	Follicular dendritic cell secreted peptide	+	0.0053913	-3.81384	Q8NFU4	Follicular dendritic cell secreted peptide	+	0.0088	-3.6277	Q8NFU4	Follicular dendritic cell secreted peptide	+	0.0321333	-3.37845	Q8NFU4	Follicular dendritic cell secreted peptide	+	0.00590476	-4.59183	Q8NFU4	Follicular dendritic cell secreted peptide	+	0.0166364	-3.53732	Q8NFU4	Follicular dendritic cell secreted peptide	+	0.0164211	-3.52659	Q8NFU4	Follicular dendritic cell secreted peptide	+	0.00843243	-4.19448
P14618	Pyruvate kinase PKM	+	0.00922222	-3.49669	P14618	Pyruvate kinase PKM		0.543333	-1.64196	P14618	Pyruvate kinase PKM	+	0	-4.73626	P14618	Pyruvate kinase PKM	+	0	-1.91967	P14618	Pyruvate kinase PKM	+	0.00685714	-1.6536	P14618	Pyruvate kinase PKM		0.21729	-1.25575	P14618	Pyruvate kinase PKM	+	0.042	-2.07814	P14618	Pyruvate kinase PKM	+	0	-3.43225	P14618	Pyruvate kinase PKM		0.0503636	-1.73851	P14618	Pyruvate kinase PKM	+	0.00830769	-3.4052
P02679	Fibrinogen gamma chain	+	0.0126452	-2.98255	P02679	Fibrinogen gamma chain		0.327785	-0.497379	P02679	Fibrinogen gamma chain		0.076764	-2.57159	P02679	Fibrinogen gamma chain	+	0.0288824	-1.85574	P02679	Fibrinogen gamma chain	+	0.0100741	-3.34444	P02679	Fibrinogen gamma chain	+	0.0332414	-3.11708	P02679	Fibrinogen gamma chain		0.0624706	-1.15842	P02679	Fibrinogen gamma chain	+	0.0260625	-1.3189	P02679	Fibrinogen gamma chain		0.250186	0.971971	P02679	Fibrinogen gamma chain	+	0.0275	-3.84068
P22079	Lactoperoxidase	+	0.0213	-3.74299	P22079	Lactoperoxidase	+	0.00824615	-3.6015	P22079	Lactoperoxidase	+	0.024	-2.50191	P22079	Lactoperoxidase	+	0.0196491	-2.47052	P22079	Lactoperoxidase		0.146776	-0.701838	P22079	Lactoperoxidase	+	0.0520889	-2.24416	P22079	Lactoperoxidase	+	0.0175309	-2.01276	P22079	Lactoperoxidase	+	0.0292537	-4.78806	P22079	Lactoperoxidase	+	0.044	-2.26582	P22079	Lactoperoxidase	+	0.0141449	-2.95812
P01859	Immunoglobulin heavy constant gamma 2		0.421165	2.52378	P01859	Immunoglobulin heavy constant gamma 2	+	0	-2.47813	P01859	Immunoglobulin heavy constant gamma 2	+	0	-2.65812	P01859	Immunoglobulin heavy constant gamma 2		0.074766	-0.631583	P01859	Immunoglobulin heavy constant gamma 2	+	0.00964706	-2.34144	P01859	Immunoglobulin heavy constant gamma 2		0.112712	-1.34237	P01859	Immunoglobulin heavy constant gamma 2	+	0	-2.02497	P01859	Immunoglobulin heavy constant gamma 2	+	0.00855556	-3.22254	P01859	Immunoglobulin heavy constant gamma 2	+	0.0144615	-2.70164	P01859	Immunoglobulin heavy constant gamma 2		0.47503	-0.254825
Q96DR5	BPI fold-containing family A member 2	+	0.0434694	-0.982044	Q96DR5	BPI fold-containing family A member 2	+	0.0287273	-1.12595	Q96DR5	BPI fold-containing family A member 2		0.313094	-1.39869	Q96DR5	BPI fold-containing family A member 2		0.923854	-0.163686	Q96DR5	BPI fold-containing family A member 2		0.267927	-0.738934	Q96DR5	BPI fold-containing family A member 2		0.259673	0.878322	Q96DR5	BPI fold-containing family A member 2		0.10163	-0.283209	Q96DR5	BPI fold-containing family A member 2		0.811877	0.0166388	Q96DR5	BPI fold-containing family A member 2		0.189488	-2.03842	Q96DR5	BPI fold-containing family A member 2		0.135478	-0.250707
P01036	Cystatin-S	+	0	-4.62665	P01036	Cystatin-S	+	0	-4.76143	P01036	Cystatin-S	+	0	-4.51787	P01036	Cystatin-S	+	0	-3.1549	P01036	Cystatin-S	+	0.00872727	-2.68709	P01036	Cystatin-S	+	0.0498723	-3.52198	P01036	Cystatin-S	+	0	-4.19167	P01036	Cystatin-S	+	0	-3.64104	P01036	Cystatin-S	+	0.0372174	-2.40277	P01036	Cystatin-S	+	0.0216	-4.45316
P11678	Eosinophil peroxidase	+	0.0297778	-1.36912	P11678	Eosinophil peroxidase	+	0.00442857	-1.93107	P11678	Eosinophil peroxidase		0.0759111	-2.54599	P11678	Eosinophil peroxidase	+	0.00966667	-1.40825	P11678	Eosinophil peroxidase	+	0.0117193	-1.08665	P11678	Eosinophil peroxidase	+	0.0509565	-2.19172	P11678	Eosinophil peroxidase	+	0.00993939	-2.01581	P11678	Eosinophil peroxidase	+	0	-1.85957	P11678	Eosinophil peroxidase	+	0.0356667	-1.50679	P11678	Eosinophil peroxidase	+	0.00891429	-1.32577
P14923	Junction plakoglobin		0.616585	1.34938	P14923	Junction plakoglobin		0.797826	-0.123341	P14923	Junction plakoglobin		0.90113	-0.316517	P14923	Junction plakoglobin		0.683375	0.0660467	P14923	Junction plakoglobin		0.908892	0.498548	P14923	Junction plakoglobin		0.190634	-0.796789	P14923	Junction plakoglobin		0.592154	1.16448	P14923	Junction plakoglobin		0.567736	-2.56489	P14923	Junction plakoglobin		0.20754	2.71096	P14923	Junction plakoglobin		0.416892	2.38879
P80511	Protein S100-A12	+	0.0213333	-4.03124	P80511	Protein S100-A12	+	0	-4.46368	P80511	Protein S100-A12	+	0	-4.84787	P80511	Protein S100-A12	+	0	-4.29954	P80511	Protein S100-A12	+	0.01375	-3.15729	P80511	Protein S100-A12	+	0.0112727	-2.94116	P80511	Protein S100-A12	+	0	-3.27012	P80511	Protein S100-A12	+	0.0088	-3.03407	P80511	Protein S100-A12	+	0.0134286	-4.12369	P80511	Protein S100-A12	+	0.00981818	-4.31929
P08670	Vimentin	+	0	-3.81456	P08670	Vimentin	+	0.00893333	-4.55366	P08670	Vimentin	+	0	-3.08983	P08670	Vimentin	+	0.0293134	-1.89266	P08670	Vimentin	+	0.00785714	-2.01501	P08670	Vimentin	+	0.0206667	-2.08636	P08670	Vimentin	+	0	-3.65738	P08670	Vimentin	+	0.00652632	-2.60946	P08670	Vimentin	+	0.050625	-3.01539	P08670	Vimentin	+	0.0078	-4.4002
P08727	Keratin, type I cytoskeletal 19	+	0.0271807	-1.4644	P08727	Keratin, type I cytoskeletal 19	+	0.00942857	-2.49534	P08727	Keratin, type I cytoskeletal 19		0.329356	-0.00825977	P08727	Keratin, type I cytoskeletal 19		0.051954	-0.970889	P08727	Keratin, type I cytoskeletal 19		0.103429	-0.456254	P08727	Keratin, type I cytoskeletal 19		0.409333	-0.0450459	P08727	Keratin, type I cytoskeletal 19	+	0	-1.81989	P08727	Keratin, type I cytoskeletal 19		0.296538	1.1536	P08727	Keratin, type I cytoskeletal 19		0.712984	0.123781	P08727	Keratin, type I cytoskeletal 19	+	0.01192	-1.42127
P06733	Alpha-enolase	+	0.012	-2.52833	P06733	Alpha-enolase	+	0.00850794	-3.47551	P06733	Alpha-enolase	+	0.03055	-2.34951	P06733	Alpha-enolase		0.775098	-0.430492	P06733	Alpha-enolase		0.210718	-1.27791	P06733	Alpha-enolase		0.666304	-0.624433	P06733	Alpha-enolase	+	0.0169315	-2.6107	P06733	Alpha-enolase		0.945285	0.718033	P06733	Alpha-enolase		0.157024	-1.69049	P06733	Alpha-enolase		0.0678846	-1.95781
P08603	Complement factor H	+	0.00809756	-3.94557	P08603	Complement factor H	+	0.0137143	-3.74831	P08603	Complement factor H	+	0.0103333	-4.51106	P08603	Complement factor H	+	0.0164	-3.78423	P08603	Complement factor H	+	0.00916667	-4.23644	P08603	Complement factor H	+	0.030125	-3.89932	P08603	Complement factor H	+	0	-4.77029	P08603	Complement factor H		0.151953	-3.63752	P08603	Complement factor H	+	0.045	-3.46965	P08603	Complement factor H	+	0.0115882	-3.35259
P0DOY2	Immunoglobulin lambda constant 2	+	0.0222222	-2.99469	P0DOY2	Immunoglobulin lambda constant 2	+	0.00431373	-2.9662	P0DOY2	Immunoglobulin lambda constant 2	+	0	-2.90737	P0DOY2	Immunoglobulin lambda constant 2	+	0.00516667	-2.78266	P0DOY2	Immunoglobulin lambda constant 2		0.107828	-1.29104	P0DOY2	Immunoglobulin lambda constant 2		0.106	-1.35978	P0DOY2	Immunoglobulin lambda constant 2	+	0	-2.36185	P0DOY2	Immunoglobulin lambda constant 2	+	0.0226122	-3.60548	P0DOY2	Immunoglobulin lambda constant 2		0.133823	-1.40313	P0DOY2	Immunoglobulin lambda constant 2	+	0.0121231	-3.30808
P0DOX2	Immunoglobulin alpha-2 heavy chain		0.927568	-0.368644	P0DOX2	Immunoglobulin alpha-2 heavy chain		0.721529	0.707798	P0DOX2	Immunoglobulin alpha-2 heavy chain		0.815378	0.252014	P0DOX2	Immunoglobulin alpha-2 heavy chain		0.828328	1.1759	P0DOX2	Immunoglobulin alpha-2 heavy chain		0.0806818	3.57013	P0DOX2	Immunoglobulin alpha-2 heavy chain	+	0.0484762	3.8822	P0DOX2	Immunoglobulin alpha-2 heavy chain		0.828086	-0.807196	P0DOX2	Immunoglobulin alpha-2 heavy chain		0.99844	-0.440806	P0DOX2	Immunoglobulin alpha-2 heavy chain		0.743938	-1.14807	P0DOX2	Immunoglobulin alpha-2 heavy chain	+	0.0123571	-1.15446
P00747	Plasminogen	+	0.0406186	-1.53136	P00747	Plasminogen		0.184476	-0.572052	P00747	Plasminogen		0.0696941	-1.33658	P00747	Plasminogen		0.990355	1.10382	P00747	Plasminogen		0.763853	0.744203	P00747	Plasminogen		0.694444	-0.190549	P00747	Plasminogen	+	0.0419574	-1.33787	P00747	Plasminogen		0.209031	-1.66294	P00747	Plasminogen		0.604437	-0.240834	P00747	Plasminogen		0.116829	-0.843882
Q9UBG3	Cornulin	+	0.0161791	-2.52205	Q9UBG3	Cornulin	+	0.00916667	-2.69005	Q9UBG3	Cornulin	+	0	-3.98552	Q9UBG3	Cornulin	+	0.0208	-2.9066	Q9UBG3	Cornulin	+	0.00733333	-3.33624	Q9UBG3	Cornulin		0.0794286	-3.22189	Q9UBG3	Cornulin	+	0.00928	-3.35263	Q9UBG3	Cornulin		0.142506	-2.84577	Q9UBG3	Cornulin		0.298869	-1.35017	Q9UBG3	Cornulin	+	0.0268889	-3.42238
P24158	Myeloblastin	+	0.0208831	1.4663	P24158	Myeloblastin		0.0628257	-0.811646	P24158	Myeloblastin		0.9142	-0.454046	P24158	Myeloblastin		0.973884	0.184394	P24158	Myeloblastin		0.148289	0.813747	P24158	Myeloblastin		0.227064	0.73823	P24158	Myeloblastin	+	0	1.96804	P24158	Myeloblastin		0.155395	-0.885094	P24158	Myeloblastin		0.376741	1.74537	P24158	Myeloblastin		0.950914	0.479588
P54108	Cysteine-rich secretory protein 3		0.0579806	-2.47281	P54108	Cysteine-rich secretory protein 3	+	0.00864516	-1.29218	P54108	Cysteine-rich secretory protein 3	+	0	-3.96666	P54108	Cysteine-rich secretory protein 3		0.0860816	-2.10245	P54108	Cysteine-rich secretory protein 3		0.881246	0.917715	P54108	Cysteine-rich secretory protein 3		0.654839	-1.57402	P54108	Cysteine-rich secretory protein 3	+	0.0415158	-2.06296	P54108	Cysteine-rich secretory protein 3	+	0.02216	-3.01764	P54108	Cysteine-rich secretory protein 3	+	0.04976	-1.4137	P54108	Cysteine-rich secretory protein 3	+	0.0072	-3.62906
P80188	Neutrophil gelatinase-associated lipocalin		0.0703077	-2.39935	P80188	Neutrophil gelatinase-associated lipocalin	+	0.00326316	-3.45872	P80188	Neutrophil gelatinase-associated lipocalin	+	0.0190204	-3.62902	P80188	Neutrophil gelatinase-associated lipocalin	+	0.0140513	-2.6518	P80188	Neutrophil gelatinase-associated lipocalin	+	0.00762791	-2.83179	P80188	Neutrophil gelatinase-associated lipocalin		0.0874483	-1.67964	P80188	Neutrophil gelatinase-associated lipocalin	+	0.00946939	-2.67865	P80188	Neutrophil gelatinase-associated lipocalin	+	0.00590476	-3.50491	P80188	Neutrophil gelatinase-associated lipocalin	+	0.0487547	-1.50027	P80188	Neutrophil gelatinase-associated lipocalin	+	0.008	-3.43641
P01008	Antithrombin-III		0.1704	-1.16399	P01008	Antithrombin-III	+	0.00344444	-1.56618	P01008	Antithrombin-III		0.401398	-1.50311	P01008	Antithrombin-III		0.330786	-1.30825	P01008	Antithrombin-III		0.247333	-1.07493	P01008	Antithrombin-III		0.762615	1.26184	P01008	Antithrombin-III		0.151858	-0.18417	P01008	Antithrombin-III	+	0.0114074	-1.51285	P01008	Antithrombin-III	+	0.0496923	-0.660995	P01008	Antithrombin-III	+	0.00742857	-1.61842
P04004	Vitronectin	+	0.0203544	-3.31771	P04004	Vitronectin	+	0.008	-3.46012	P04004	Vitronectin		0.0688837	-3.85069	P04004	Vitronectin	+	0.0408101	-2.70384	P04004	Vitronectin	+	0.0507027	-2.74121	P04004	Vitronectin		0.107438	-2.30387	P04004	Vitronectin	+	0.01025	-2.8012	P04004	Vitronectin		0.0963544	-2.77381	P04004	Vitronectin		0.1808	-1.81085	P04004	Vitronectin	+	0.011037	-3.46696
P02774	Vitamin D-binding protein	+	0.0111864	-4.31378	P02774	Vitamin D-binding protein	+	0.00468085	-3.58716	P02774	Vitamin D-binding protein	+	0.0109412	-4.4789	P02774	Vitamin D-binding protein	+	0.0115789	-2.63808	P02774	Vitamin D-binding protein	+	0.00908333	-2.67066	P02774	Vitamin D-binding protein		0.115573	-1.84671	P02774	Vitamin D-binding protein	+	0.00809091	-2.97264	P02774	Vitamin D-binding protein	+	0.0102667	-2.73779	P02774	Vitamin D-binding protein	+	0.0462857	-2.04307	P02774	Vitamin D-binding protein	+	0.00945455	-3.68966
P08123	Collagen alpha-2(I) chain	+	0.00897297	-2.87062	P08123	Collagen alpha-2(I) chain	+	0.00984615	-1.04448	P08123	Collagen alpha-2(I) chain	+	0.0182745	-3.17263	P08123	Collagen alpha-2(I) chain	+	0.00476923	-2.12762	P08123	Collagen alpha-2(I) chain	+	0.0104762	-2.17502	P08123	Collagen alpha-2(I) chain		0.0805926	-2.65731	P08123	Collagen alpha-2(I) chain	+	0.0111186	-2.22631	P08123	Collagen alpha-2(I) chain	+	0	2.91043	P08123	Collagen alpha-2(I) chain		0.103243	-0.771737	P08123	Collagen alpha-2(I) chain	+	0.0045	-2.63461
P01591	Immunoglobulin J chain	+	0.0337391	-2.72946	P01591	Immunoglobulin J chain	+	0.003875	-5.09869	P01591	Immunoglobulin J chain	+	0	-5.34013	P01591	Immunoglobulin J chain	+	0	-4.33927	P01591	Immunoglobulin J chain	+	0.00709677	-4.78066	P01591	Immunoglobulin J chain		0.142308	-2.18312	P01591	Immunoglobulin J chain	+	0.01775	-4.16839	P01591	Immunoglobulin J chain	+	0	-5.11559	P01591	Immunoglobulin J chain	+	0.0415172	-3.38044	P01591	Immunoglobulin J chain	+	0.00568421	-4.69678
P23280	Carbonic anhydrase 6		0.562357	0.694104	P23280	Carbonic anhydrase 6		0.142328	-2.52992	P23280	Carbonic anhydrase 6		0.812824	1.90502	P23280	Carbonic anhydrase 6		0.354957	1.69723	P23280	Carbonic anhydrase 6		0.609921	1.22392	P23280	Carbonic anhydrase 6		0.570136	-2.15388	P23280	Carbonic anhydrase 6		0.234787	-3.10022	P23280	Carbonic anhydrase 6		0.175604	2.05965	P23280	Carbonic anhydrase 6		0.994763	2.51602	P23280	Carbonic anhydrase 6		0.324968	1.37814
P52209	6-phosphogluconate dehydrogenase, decarboxylating	+	0.0144348	-3.06036	P52209	6-phosphogluconate dehydrogenase, decarboxylating	+	0	-3.76348	P52209	6-phosphogluconate dehydrogenase, decarboxylating	+	0	-4.35775	P52209	6-phosphogluconate dehydrogenase, decarboxylating	+	0.0173333	-2.56984	P52209	6-phosphogluconate dehydrogenase, decarboxylating	+	0.00780952	-2.3263	P52209	6-phosphogluconate dehydrogenase, decarboxylating	+	0.04936	-3.50331	P52209	6-phosphogluconate dehydrogenase, decarboxylating	+	0.0127536	-2.92334	P52209	6-phosphogluconate dehydrogenase, decarboxylating	+	0.0284058	-4.87623	P52209	6-phosphogluconate dehydrogenase, decarboxylating	+	0.0471351	-2.92666	P52209	6-phosphogluconate dehydrogenase, decarboxylating	+	0.0166667	-3.32453
P04114	Apolipoprotein B-100	+	0.0166	-3.51096	P04114	Apolipoprotein B-100	+	0.0044898	-4.2842	P04114	Apolipoprotein B-100	+	0	-4.46587	P04114	Apolipoprotein B-100	+	0.0185532	-3.11424	P04114	Apolipoprotein B-100	+	0.0122222	-3.44642	P04114	Apolipoprotein B-100	+	0.0431765	-3.38783	P04114	Apolipoprotein B-100	+	0	-3.02405	P04114	Apolipoprotein B-100	+	0	-4.15244	P04114	Apolipoprotein B-100	+	0.0110588	-3.23941	P04114	Apolipoprotein B-100	+	0.0054	-4.62801
P02452	Collagen alpha-1(I) chain	+	0.016	-3.01847	P02452	Collagen alpha-1(I) chain		0.103767	-0.25518	P02452	Collagen alpha-1(I) chain	+	0	-3.23031	P02452	Collagen alpha-1(I) chain	+	0	-1.90563	P02452	Collagen alpha-1(I) chain	+	0	-2.29753	P02452	Collagen alpha-1(I) chain	+	0	-2.29743	P02452	Collagen alpha-1(I) chain	+	0	-3.11253	P02452	Collagen alpha-1(I) chain	+	0	3.59116	P02452	Collagen alpha-1(I) chain		0.907852	0.0542889	P02452	Collagen alpha-1(I) chain	+	0.0108	-2.37232
P02533	Keratin, type I cytoskeletal 14	+	0.0128525	-4.98631	P02533	Keratin, type I cytoskeletal 14		0.177856	-2.2942	P02533	Keratin, type I cytoskeletal 14		0.255929	-6.51778	P02533	Keratin, type I cytoskeletal 14		0.149962	-4.99071	P02533	Keratin, type I cytoskeletal 14	+	0.00745455	-5.91696	P02533	Keratin, type I cytoskeletal 14	+	0.052	-4.17829	P02533	Keratin, type I cytoskeletal 14	+	0.0170256	-4.3985	P02533	Keratin, type I cytoskeletal 14		0.352367	-2.23743	P02533	Keratin, type I cytoskeletal 14		0.64076	-0.0199413	P02533	Keratin, type I cytoskeletal 14		0.082	-5.29599
Q8TAX7	Mucin-7	+	0.0141587	-4.55104	Q8TAX7	Mucin-7	+	0	-3.94572	Q8TAX7	Mucin-7	+	0.015122	-4.69643	Q8TAX7	Mucin-7	+	0.0118919	-2.87837	Q8TAX7	Mucin-7	+	0	-2.14274	Q8TAX7	Mucin-7	+	0.0145	-2.00268	Q8TAX7	Mucin-7	+	0.0174737	-2.99962	Q8TAX7	Mucin-7	+	0	-3.6574	Q8TAX7	Mucin-7	+	0	-3.92554	Q8TAX7	Mucin-7	+	0.004	-4.73743
P02671	Fibrinogen alpha chain		0.128143	-2.03426	P02671	Fibrinogen alpha chain		0.157032	1.48578	P02671	Fibrinogen alpha chain		0.114178	-1.80959	P02671	Fibrinogen alpha chain		0.107636	-1.36556	P02671	Fibrinogen alpha chain		0.514211	-0.235522	P02671	Fibrinogen alpha chain		0.750946	-0.0955801	P02671	Fibrinogen alpha chain	+	0.0410667	-1.47901	P02671	Fibrinogen alpha chain		0.0700267	-1.35906	P02671	Fibrinogen alpha chain		0.368594	1.01663	P02671	Fibrinogen alpha chain		0.100881	-0.837567
P00558	Phosphoglycerate kinase 1	+	0.0273488	-3.5134	P00558	Phosphoglycerate kinase 1	+	0.00891892	-4.18811	P00558	Phosphoglycerate kinase 1	+	0.0173023	-5.12682	P00558	Phosphoglycerate kinase 1	+	0.0324324	-3.40871	P00558	Phosphoglycerate kinase 1	+	0.0308923	-3.13706	P00558	Phosphoglycerate kinase 1	+	0.0503673	-3.23751	P00558	Phosphoglycerate kinase 1	+	0.015662	-4.78336	P00558	Phosphoglycerate kinase 1		0.120099	-2.17585	P00558	Phosphoglycerate kinase 1		0.0544561	-3.44527	P00558	Phosphoglycerate kinase 1	+	0.0168831	-3.16232
O75594	Peptidoglycan recognition protein 1		0.396672	-0.0735245	O75594	Peptidoglycan recognition protein 1		0.0661818	-1.28348	O75594	Peptidoglycan recognition protein 1		0.215514	1.80063	O75594	Peptidoglycan recognition protein 1		0.404231	0.150051	O75594	Peptidoglycan recognition protein 1		0.651132	-0.505805	O75594	Peptidoglycan recognition protein 1	+	0.02432	4.46956	O75594	Peptidoglycan recognition protein 1	+	0.0179747	2.04311	O75594	Peptidoglycan recognition protein 1		0.293714	0.545324	O75594	Peptidoglycan recognition protein 1	+	0.0434419	4.73577	O75594	Peptidoglycan recognition protein 1	+	0.0350316	3.90364
P62805	Histone H4	+	0.0158919	-2.79667	P62805	Histone H4	+	0.0096	-4.23675	P62805	Histone H4	+	0.0169455	-3.09132	P62805	Histone H4	+	0.0177273	-2.94665	P62805	Histone H4	+	0.0487273	-1.84183	P62805	Histone H4		0.18716	-3.09154	P62805	Histone H4	+	0.036	-1.93313	P62805	Histone H4		0.568131	0.21402	P62805	Histone H4	+	0.0458947	-2.35647	P62805	Histone H4	+	0.0346667	-1.4818
Q6P5S2	Protein LEG1 homolog	+	0.032	-3.0697	Q6P5S2	Protein LEG1 homolog	+	0	-1.99205	Q6P5S2	Protein LEG1 homolog	+	0.0293671	-1.87109	Q6P5S2	Protein LEG1 homolog	+	0	-2.39527	Q6P5S2	Protein LEG1 homolog		0.211882	-0.175387	Q6P5S2	Protein LEG1 homolog		0.25798	-0.3125	Q6P5S2	Protein LEG1 homolog	+	0	-1.85588	Q6P5S2	Protein LEG1 homolog	+	0	-3.72419	Q6P5S2	Protein LEG1 homolog		0.0517333	-1.21042	Q6P5S2	Protein LEG1 homolog	+	0.037102	-1.10493
P02042	Hemoglobin subunit delta	+	0.00873684	-2.09052	P02042	Hemoglobin subunit delta	+	0	-3.06966	P02042	Hemoglobin subunit delta	+	0	-2.04694	P02042	Hemoglobin subunit delta	+	0.003875	-1.85688	P02042	Hemoglobin subunit delta	+	0.00872	-2.58012	P02042	Hemoglobin subunit delta	+	0.0496585	-1.8859	P02042	Hemoglobin subunit delta	+	0	-2.37626	P02042	Hemoglobin subunit delta	+	0	-2.17719	P02042	Hemoglobin subunit delta		0.0554815	-1.06507	P02042	Hemoglobin subunit delta	+	0.00918182	-2.9806
P02766	Transthyretin	+	0.0131765	-3.67734	P02766	Transthyretin	+	0.00669231	-2.34733	P02766	Transthyretin		0.539692	0.226937	P02766	Transthyretin		0.882963	1.33158	P02766	Transthyretin	+	0.0329552	-1.75353	P02766	Transthyretin	+	0.0432821	-2.15149	P02766	Transthyretin	+	0.0439175	-1.34542	P02766	Transthyretin		0.235434	-0.659143	P02766	Transthyretin		0.0511385	2.41196	P02766	Transthyretin		0.295107	-0.753874
P62937	Peptidyl-prolyl cis-trans isomerase A	+	0.00754545	-1.81395	P62937	Peptidyl-prolyl cis-trans isomerase A	+	0	-2.48812	P62937	Peptidyl-prolyl cis-trans isomerase A	+	0	-2.36975	P62937	Peptidyl-prolyl cis-trans isomerase A	+	0.0297576	-2.30162	P62937	Peptidyl-prolyl cis-trans isomerase A	+	0.00889796	-1.65122	P62937	Peptidyl-prolyl cis-trans isomerase A	+	0.0253333	-1.34601	P62937	Peptidyl-prolyl cis-trans isomerase A	+	0	-1.97632	P62937	Peptidyl-prolyl cis-trans isomerase A		0.548874	-0.238479	P62937	Peptidyl-prolyl cis-trans isomerase A		0.0891268	-1.61698	P62937	Peptidyl-prolyl cis-trans isomerase A	+	0.00469565	-2.11318
P02765	Alpha-2-HS-glycoprotein	+	0.0168	-2.50013	P02765	Alpha-2-HS-glycoprotein	+	0.0031	-3.94485	P02765	Alpha-2-HS-glycoprotein	+	0.0182609	-4.24347	P02765	Alpha-2-HS-glycoprotein		0.0640879	-1.76124	P02765	Alpha-2-HS-glycoprotein	+	0.00937143	-2.83622	P02765	Alpha-2-HS-glycoprotein		0.903794	-0.185387	P02765	Alpha-2-HS-glycoprotein	+	0.00964706	-2.92174	P02765	Alpha-2-HS-glycoprotein		0.358836	-1.2577	P02765	Alpha-2-HS-glycoprotein		0.129487	-2.61703	P02765	Alpha-2-HS-glycoprotein	+	0.0111613	-2.93616
P09211	Glutathione S-transferase P	+	0.00910638	-3.59197	P09211	Glutathione S-transferase P	+	0.0104941	-2.47498	P09211	Glutathione S-transferase P		0.356303	-0.226685	P09211	Glutathione S-transferase P		0.14901	-1.17197	P09211	Glutathione S-transferase P		0.0583704	-2.34749	P09211	Glutathione S-transferase P		0.0821132	-2.11575	P09211	Glutathione S-transferase P		0.229223	-2.49539	P09211	Glutathione S-transferase P		0.091641	-4.15438	P09211	Glutathione S-transferase P	+	0.0289091	-3.24207	P09211	Glutathione S-transferase P		0.101091	-4.25732
P02743	Serum amyloid P-component	+	0.0150909	-2.339	P02743	Serum amyloid P-component	+	0.00644444	-2.7819	P02743	Serum amyloid P-component	+	0	-1.61617	P02743	Serum amyloid P-component	+	0.0357867	-1.98282	P02743	Serum amyloid P-component		0.390085	-2.09236	P02743	Serum amyloid P-component	+	0.0233846	-1.82063	P02743	Serum amyloid P-component	+	0	-1.9226	P02743	Serum amyloid P-component		0.143762	-1.20148	P02743	Serum amyloid P-component	+	0.0478667	-1.33101	P02743	Serum amyloid P-component		0.0551765	-2.06909
P02763	Alpha-1-acid glycoprotein 1		0.127009	-2.37456	P02763	Alpha-1-acid glycoprotein 1	+	0.0398476	-2.12427	P02763	Alpha-1-acid glycoprotein 1		0.246255	-1.33252	P02763	Alpha-1-acid glycoprotein 1		0.0745376	-2.17989	P02763	Alpha-1-acid glycoprotein 1	+	0.031375	-1.79336	P02763	Alpha-1-acid glycoprotein 1		0.224674	-2.53463	P02763	Alpha-1-acid glycoprotein 1		0.104477	-1.31423	P02763	Alpha-1-acid glycoprotein 1		0.175364	-1.23894	P02763	Alpha-1-acid glycoprotein 1		0.381208	0.601745	P02763	Alpha-1-acid glycoprotein 1		0.372535	-0.371927
P27105	Stomatin	+	0.0448	-1.82188	P27105	Stomatin		0.0525607	-1.80274	P27105	Stomatin	+	0.0163175	-3.14041	P27105	Stomatin		0.0636	-2.64857	P27105	Stomatin	+	0.0493684	-1.83621	P27105	Stomatin		0.307346	-1.09819	P27105	Stomatin		0.166325	-1.07049	P27105	Stomatin		0.202065	-3.26587	P27105	Stomatin		0.503235	-1.03917	P27105	Stomatin		0.816	1.12597
P07737	Profilin-1	+	0.0117857	-3.72043	P07737	Profilin-1	+	0.010747	-2.96335	P07737	Profilin-1	+	0.0218286	-3.25664	P07737	Profilin-1	+	0.0485581	-2.58492	P07737	Profilin-1	+	0.0432941	-2.5521	P07737	Profilin-1		0.0859661	-2.65433	P07737	Profilin-1	+	0.0104127	-3.24602	P07737	Profilin-1	+	0.0386667	-3.65697	P07737	Profilin-1	+	0.0436	-3.75411	P07737	Profilin-1	+	0.0124167	-4.34991
P11142	Heat shock cognate 71 kDa protein		0.0826916	-2.59392	P11142	Heat shock cognate 71 kDa protein	+	0.0309412	-2.70265	P11142	Heat shock cognate 71 kDa protein		0.0706207	-3.92148	P11142	Heat shock cognate 71 kDa protein		0.975886	-0.702188	P11142	Heat shock cognate 71 kDa protein	+	0.00854902	-1.26797	P11142	Heat shock cognate 71 kDa protein	+	0.0344286	-1.51047	P11142	Heat shock cognate 71 kDa protein		0.0514059	-3.25188	P11142	Heat shock cognate 71 kDa protein		0.449878	-0.507812	P11142	Heat shock cognate 71 kDa protein		0.553368	-0.0445213	P11142	Heat shock cognate 71 kDa protein	+	0.00432	-3.0596
P13727	Bone marrow proteoglycan		0.222286	-2.6793	P13727	Bone marrow proteoglycan		0.90754	-0.642547	P13727	Bone marrow proteoglycan		0.0997113	-2.07547	P13727	Bone marrow proteoglycan		0.351898	-1.06935	P13727	Bone marrow proteoglycan		0.100989	0.596444	P13727	Bone marrow proteoglycan		0.914861	-0.547537	P13727	Bone marrow proteoglycan		0.827562	0.188838	P13727	Bone marrow proteoglycan		0.939529	-0.00454426	P13727	Bone marrow proteoglycan		0.363534	0.56339	P13727	Bone marrow proteoglycan		0.660385	-1.31941
P01011	Alpha-1-antichymotrypsin	+	0.0341702	-2.02807	P01011	Alpha-1-antichymotrypsin	+	0.010619	-1.88938	P01011	Alpha-1-antichymotrypsin		0.119804	-1.14617	P01011	Alpha-1-antichymotrypsin	+	0.0185714	-2.15227	P01011	Alpha-1-antichymotrypsin		0.0654762	-1.30677	P01011	Alpha-1-antichymotrypsin		0.367551	-0.567162	P01011	Alpha-1-antichymotrypsin	+	0.022878	-2.07167	P01011	Alpha-1-antichymotrypsin	+	0.0234194	-2.50123	P01011	Alpha-1-antichymotrypsin		0.387018	-1.1319	P01011	Alpha-1-antichymotrypsin	+	0.0312527	-2.77843
P10909	Clusterin	+	0.0083	-2.31393	P10909	Clusterin	+	0	-3.76868	P10909	Clusterin	+	0.0209552	-2.54998	P10909	Clusterin	+	0.00442857	-3.09569	P10909	Clusterin	+	0.00846154	-3.01833	P10909	Clusterin	+	0.0532727	-2.06944	P10909	Clusterin	+	0.00773913	-1.96976	P10909	Clusterin	+	0.0106341	-1.53493	P10909	Clusterin	+	0.0173333	-2.7321	P10909	Clusterin	+	0.00514286	-4.00752
Q9HD89	Resistin		0.82206	1.32423	Q9HD89	Resistin	+	0.00413333	-1.82205	Q9HD89	Resistin		0.152155	5.06326	Q9HD89	Resistin	+	0	3.41802	Q9HD89	Resistin	+	0.00841026	1.47428	Q9HD89	Resistin		0.358566	4.16943	Q9HD89	Resistin	+	0	2.96841	Q9HD89	Resistin		0.41915	1.32894	Q9HD89	Resistin		0.975652	-0.909218	Q9HD89	Resistin		0.595672	3.02885
P15153	Ras-related C3 botulinum toxin substrate 2	+	0.0304545	-1.69996	P15153	Ras-related C3 botulinum toxin substrate 2	+	0.00972152	-2.91092	P15153	Ras-related C3 botulinum toxin substrate 2	+	0.0206471	-2.71024	P15153	Ras-related C3 botulinum toxin substrate 2	+	0.0367368	-2.1168	P15153	Ras-related C3 botulinum toxin substrate 2		0.0681395	-1.32225	P15153	Ras-related C3 botulinum toxin substrate 2		0.128468	-1.25908	P15153	Ras-related C3 botulinum toxin substrate 2	+	0.0158857	-2.46569	P15153	Ras-related C3 botulinum toxin substrate 2	+	0.0230833	-2.62478	P15153	Ras-related C3 botulinum toxin substrate 2		0.102027	-1.9637	P15153	Ras-related C3 botulinum toxin substrate 2	+	0.024092	-1.74661
P25705	ATP synthase subunit alpha, mitochondrial	+	0.00790476	-3.53737	P25705	ATP synthase subunit alpha, mitochondrial	+	0.00788235	-2.48872	P25705	ATP synthase subunit alpha, mitochondrial	+	0	-3.24683	P25705	ATP synthase subunit alpha, mitochondrial	+	0.0231613	-2.73611	P25705	ATP synthase subunit alpha, mitochondrial	+	0.0102642	-1.96966	P25705	ATP synthase subunit alpha, mitochondrial		0.107754	-3.01201	P25705	ATP synthase subunit alpha, mitochondrial	+	0	-3.02428	P25705	ATP synthase subunit alpha, mitochondrial		0.486496	-0.140861	P25705	ATP synthase subunit alpha, mitochondrial		0.120831	-0.924548	P25705	ATP synthase subunit alpha, mitochondrial	+	0.00866667	-3.03158
P31025	Lipocalin-1		0.17169	-5.84755	P31025	Lipocalin-1	+	0.0115455	-5.35425	P31025	Lipocalin-1		0.636885	-1.76046	P31025	Lipocalin-1		0.106733	-6.19054	P31025	Lipocalin-1		0.985986	-0.987655	P31025	Lipocalin-1		0.791669	-0.533695	P31025	Lipocalin-1		0.109927	-4.63543	P31025	Lipocalin-1		0.460276	-1.5201	P31025	Lipocalin-1		0.713906	0.750011	P31025	Lipocalin-1		0.137062	-5.38406
P23528	Cofilin-1	+	0.0106154	-3.35555	P23528	Cofilin-1	+	0.02844	-3.52816	P23528	Cofilin-1	+	0.0243288	-1.99565	P23528	Cofilin-1		0.397767	-0.138462	P23528	Cofilin-1		0.68174	0.112694	P23528	Cofilin-1		0.144152	-1.29028	P23528	Cofilin-1	+	0.0172468	-2.13181	P23528	Cofilin-1		0.596065	0.555143	P23528	Cofilin-1		0.379402	-0.63076	P23528	Cofilin-1		0.229094	-0.112484
P49913	Cathelicidin antimicrobial peptide	+	0.0248889	-3.02647	P49913	Cathelicidin antimicrobial peptide	+	0.00745763	-1.83763	P49913	Cathelicidin antimicrobial peptide	+	0	-2.84086	P49913	Cathelicidin antimicrobial peptide	+	0	-3.02136	P49913	Cathelicidin antimicrobial peptide	+	0.0133793	-2.49537	P49913	Cathelicidin antimicrobial peptide		0.0585385	-0.911527	P49913	Cathelicidin antimicrobial peptide	+	0	-1.86352	P49913	Cathelicidin antimicrobial peptide	+	0.0259286	-2.03948	P49913	Cathelicidin antimicrobial peptide	+	0	-1.8702	P49913	Cathelicidin antimicrobial peptide	+	0.0125818	-2.36067
P02652	Apolipoprotein A-II	+	0.0248293	-3.63397	P02652	Apolipoprotein A-II		0.365466	-1.41372	P02652	Apolipoprotein A-II		0.393475	0.573381	P02652	Apolipoprotein A-II		0.711115	0.393631	P02652	Apolipoprotein A-II		0.398118	-0.130612	P02652	Apolipoprotein A-II		0.247588	1.24048	P02652	Apolipoprotein A-II	+	0.0328	-2.80297	P02652	Apolipoprotein A-II		0.378919	0.798969	P02652	Apolipoprotein A-II		0.9976	0.84493	P02652	Apolipoprotein A-II	+	0.0123125	-2.46011
P05107	Integrin beta-2	+	0.00930435	-1.98111	P05107	Integrin beta-2	+	0.0318447	-1.95821	P05107	Integrin beta-2	+	0.0127179	-2.46507	P05107	Integrin beta-2	+	0	-1.99853	P05107	Integrin beta-2	+	0.00993939	-1.77922	P05107	Integrin beta-2	+	0	-1.34399	P05107	Integrin beta-2	+	0	-2.56253	P05107	Integrin beta-2	+	0.0126512	-2.41411	P05107	Integrin beta-2	+	0	-2.34448	P05107	Integrin beta-2	+	0.011931	-2.60708
P40199	Carcinoembryonic antigen-related cell adhesion molecule 6	+	0.01328	-3.38504	P40199	Carcinoembryonic antigen-related cell adhesion molecule 6	+	0.00812121	-3.99119	P40199	Carcinoembryonic antigen-related cell adhesion molecule 6	+	0	-3.28317	P40199	Carcinoembryonic antigen-related cell adhesion molecule 6		0.978906	1.11422	P40199	Carcinoembryonic antigen-related cell adhesion molecule 6	+	0.01	-2.90313	P40199	Carcinoembryonic antigen-related cell adhesion molecule 6	+	0.0165714	-4.23583	P40199	Carcinoembryonic antigen-related cell adhesion molecule 6	+	0.00741667	-3.72911	P40199	Carcinoembryonic antigen-related cell adhesion molecule 6	+	0	-3.8909	P40199	Carcinoembryonic antigen-related cell adhesion molecule 6	+	0.00872727	-4.06874	P40199	Carcinoembryonic antigen-related cell adhesion molecule 6	+	0.0104	-3.69264
P08729	Keratin, type II cytoskeletal 7	+	0.0163333	-2.18621	P08729	Keratin, type II cytoskeletal 7	+	0.00776812	-3.32034	P08729	Keratin, type II cytoskeletal 7		0.09875	-2.20205	P08729	Keratin, type II cytoskeletal 7	+	0.0181395	-2.63482	P08729	Keratin, type II cytoskeletal 7	+	0.0474937	-2.1394	P08729	Keratin, type II cytoskeletal 7	+	0.043027	-2.39933	P08729	Keratin, type II cytoskeletal 7	+	0.0415281	-1.71141	P08729	Keratin, type II cytoskeletal 7	+	0.028303	-1.85404	P08729	Keratin, type II cytoskeletal 7		0.1549	-1.45263	P08729	Keratin, type II cytoskeletal 7	+	0.0125079	-2.49177
P15515	Histatin-1	+	0.028	-2.55919	P15515	Histatin-1		0.142049	-0.435598	P15515	Histatin-1	+	0.0462381	-2.67086	P15515	Histatin-1		0.352281	-0.325909	P15515	Histatin-1		0.46876	0.422017	P15515	Histatin-1		0.583361	-0.536996	P15515	Histatin-1	+	0.0107541	-2.11894	P15515	Histatin-1	+	0.0250345	-1.99218	P15515	Histatin-1	+	0.0476471	-0.94462	P15515	Histatin-1	+	0.0163288	-1.41607
P31949	Protein S100-A11		0.632244	-1.00883	P31949	Protein S100-A11		0.908766	1.52346	P31949	Protein S100-A11		0.359	-0.978166	P31949	Protein S100-A11		0.923382	0.477327	P31949	Protein S100-A11		0.65525	1.07917	P31949	Protein S100-A11		0.769038	-1.31189	P31949	Protein S100-A11		0.716269	-0.395302	P31949	Protein S100-A11		0.763719	0.0787573	P31949	Protein S100-A11		0.470246	-2.40595	P31949	Protein S100-A11		0.599218	-2.10507
P10599	Thioredoxin		0.797474	-0.430948	P10599	Thioredoxin		0.699111	-1.2084	P10599	Thioredoxin		0.519492	-0.735503	P10599	Thioredoxin	+	0.0403	-2.26763	P10599	Thioredoxin	+	0.0481026	-1.3511	P10599	Thioredoxin		0.285109	-1.28326	P10599	Thioredoxin		0.39781	-3.30853	P10599	Thioredoxin	+	0	-2.52086	P10599	Thioredoxin		0.727349	-0.673328	P10599	Thioredoxin		0.136667	-3.38825
P08493	Matrix Gla protein	+	0.0170435	-2.14032	P08493	Matrix Gla protein	+	0.00758621	1.05904	P08493	Matrix Gla protein	+	0.044878	-2.51523	P08493	Matrix Gla protein		0.658272	1.22314	P08493	Matrix Gla protein		0.710647	-0.443661	P08493	Matrix Gla protein		0.699465	-0.0347567	P08493	Matrix Gla protein	+	0.00859259	-2.09109	P08493	Matrix Gla protein		0.0571351	-2.38007	P08493	Matrix Gla protein		0.247617	-0.526556	P08493	Matrix Gla protein	+	0.00385714	-2.50905
P00751	Complement factor B	+	0.00772093	-3.4403	P00751	Complement factor B	+	0.0116782	-3.86832	P00751	Complement factor B	+	0	-4.30419	P00751	Complement factor B	+	0.0284638	-2.52755	P00751	Complement factor B	+	0.0146667	-2.8216	P00751	Complement factor B	+	0.0357037	-2.26628	P00751	Complement factor B	+	0.0177067	-2.83505	P00751	Complement factor B	+	0	-3.75807	P00751	Complement factor B	+	0.0444762	-3.1767	P00751	Complement factor B	+	0.00490909	-3.77308
P01860	Immunoglobulin heavy constant gamma 3	+	0.0108235	-3.02059	P01860	Immunoglobulin heavy constant gamma 3	+	0	-5.37536	P01860	Immunoglobulin heavy constant gamma 3	+	0	-4.77932	P01860	Immunoglobulin heavy constant gamma 3	+	0	-3.94005	P01860	Immunoglobulin heavy constant gamma 3	+	0.00697872	-4.54277	P01860	Immunoglobulin heavy constant gamma 3	+	0.0209412	-3.51567	P01860	Immunoglobulin heavy constant gamma 3	+	0	-0.816982	P01860	Immunoglobulin heavy constant gamma 3	+	0.0238033	-3.18824	P01860	Immunoglobulin heavy constant gamma 3		0.238667	-0.933135	P01860	Immunoglobulin heavy constant gamma 3	+	0.0161081	-3.46472
P05090	Apolipoprotein D	+	0.0377083	-1.40444	P05090	Apolipoprotein D	+	0.00427586	-3.36729	P05090	Apolipoprotein D	+	0.0172593	-1.89818	P05090	Apolipoprotein D	+	0.0362597	-1.78141	P05090	Apolipoprotein D	+	0.00863158	-2.50811	P05090	Apolipoprotein D	+	0.0444211	-2.217	P05090	Apolipoprotein D	+	0.030988	-1.91353	P05090	Apolipoprotein D	+	0.0287385	-4.36153	P05090	Apolipoprotein D	+	0.0447179	-2.65969	P05090	Apolipoprotein D	+	0.0196456	-2.15282
P01033	Metalloproteinase inhibitor 1	+	0.00976471	-2.52309	P01033	Metalloproteinase inhibitor 1		0.0734643	-0.704645	P01033	Metalloproteinase inhibitor 1	+	0.0190909	-1.77129	P01033	Metalloproteinase inhibitor 1	+	0.0280571	-1.84063	P01033	Metalloproteinase inhibitor 1	+	0.0263492	-1.4587	P01033	Metalloproteinase inhibitor 1	+	0	-1.32826	P01033	Metalloproteinase inhibitor 1	+	0.0105806	-2.064	P01033	Metalloproteinase inhibitor 1	+	0	-3.08488	P01033	Metalloproteinase inhibitor 1	+	0.0302857	-2.48549	P01033	Metalloproteinase inhibitor 1	+	0	-3.01893
P0DOX8	Immunoglobulin lambda-1 light chain	+	0.0203636	-5.70939	P0DOX8	Immunoglobulin lambda-1 light chain	+	0.00364706	-6.06052	P0DOX8	Immunoglobulin lambda-1 light chain	+	0	-7.31094	P0DOX8	Immunoglobulin lambda-1 light chain	+	0	-7.11968	P0DOX8	Immunoglobulin lambda-1 light chain	+	0.00956522	-5.61105	P0DOX8	Immunoglobulin lambda-1 light chain	+	0.0155	-4.74586	P0DOX8	Immunoglobulin lambda-1 light chain	+	0	-6.96297	P0DOX8	Immunoglobulin lambda-1 light chain	+	0.00993548	-7.85408	P0DOX8	Immunoglobulin lambda-1 light chain	+	0	-5.00859	P0DOX8	Immunoglobulin lambda-1 light chain	+	0	-8.46851
P01619	Immunoglobulin kappa variable 3-20	+	0.0164242	-3.4914	P01619	Immunoglobulin kappa variable 3-20	+	0.00317949	-3.28611	P01619	Immunoglobulin kappa variable 3-20	+	0.0175	-2.31798	P01619	Immunoglobulin kappa variable 3-20	+	0.0219608	-2.35259	P01619	Immunoglobulin kappa variable 3-20	+	0.0115789	-3.78196	P01619	Immunoglobulin kappa variable 3-20		0.49569	-0.533243	P01619	Immunoglobulin kappa variable 3-20	+	0	-3.52314	P01619	Immunoglobulin kappa variable 3-20	+	0.009625	-3.06117	P01619	Immunoglobulin kappa variable 3-20	+	0.0422041	-2.00246	P01619	Immunoglobulin kappa variable 3-20	+	0.0139429	-3.28996
P41218	Myeloid cell nuclear differentiation antigen	+	0.0166769	-2.71891	P41218	Myeloid cell nuclear differentiation antigen	+	0.00511628	-3.1419	P41218	Myeloid cell nuclear differentiation antigen		0.0842198	-1.86494	P41218	Myeloid cell nuclear differentiation antigen		0.672762	-0.213139	P41218	Myeloid cell nuclear differentiation antigen	+	0.0129333	-1.9303	P41218	Myeloid cell nuclear differentiation antigen		0.114278	-2.55259	P41218	Myeloid cell nuclear differentiation antigen		0.216403	-1.25369	P41218	Myeloid cell nuclear differentiation antigen	+	0.00832432	-3.24278	P41218	Myeloid cell nuclear differentiation antigen		0.0519375	-1.77702	P41218	Myeloid cell nuclear differentiation antigen	+	0.0152778	-2.33756
P07996	Thrombospondin-1	+	0.0114483	-5.65089	P07996	Thrombospondin-1		0.0762807	-1.66951	P07996	Thrombospondin-1	+	0.0100541	-4.49932	P07996	Thrombospondin-1	+	0.01992	-3.95937	P07996	Thrombospondin-1	+	0.0334545	-3.47454	P07996	Thrombospondin-1	+	0.0453	-3.3963	P07996	Thrombospondin-1	+	0.00965517	-3.46132	P07996	Thrombospondin-1	+	0.0242	-3.24494	P07996	Thrombospondin-1	+	0.0424545	-3.41288	P07996	Thrombospondin-1	+	0.0400404	-3.66397
P23284	Peptidyl-prolyl cis-trans isomerase B		0.226098	-3.21874	P23284	Peptidyl-prolyl cis-trans isomerase B	+	0.00929577	-4.33703	P23284	Peptidyl-prolyl cis-trans isomerase B		0.174095	-2.38507	P23284	Peptidyl-prolyl cis-trans isomerase B		0.179738	-1.88606	P23284	Peptidyl-prolyl cis-trans isomerase B		0.212491	-2.93002	P23284	Peptidyl-prolyl cis-trans isomerase B		0.287098	1.57402	P23284	Peptidyl-prolyl cis-trans isomerase B		0.737363	0.757244	P23284	Peptidyl-prolyl cis-trans isomerase B		0.953275	0.0404139	P23284	Peptidyl-prolyl cis-trans isomerase B		0.9315	1.36335	P23284	Peptidyl-prolyl cis-trans isomerase B		0.362476	0.0353823
P25815	Protein S100-P		0.213915	-3.15881	P25815	Protein S100-P	+	0.00878689	-4.39424	P25815	Protein S100-P		0.506208	-1.14989	P25815	Protein S100-P		0.355931	-4.10264	P25815	Protein S100-P		0.0764138	0.918819	P25815	Protein S100-P		0.79009	1.40903	P25815	Protein S100-P	+	0.041978	1.50323	P25815	Protein S100-P		0.198217	-4.62686	P25815	Protein S100-P		0.0635821	-3.42115	P25815	Protein S100-P		0.346208	-4.90598
P06870	Kallikrein-1	+	0.0139375	-2.61267	P06870	Kallikrein-1	+	0.00478261	-3.28922	P06870	Kallikrein-1	+	0.0215211	-3.03634	P06870	Kallikrein-1	+	0	-3.40395	P06870	Kallikrein-1	+	0.008	-4.04507	P06870	Kallikrein-1	+	0.0264348	-3.18189	P06870	Kallikrein-1	+	0.00875472	-2.62152	P06870	Kallikrein-1	+	0.009	-4.36724	P06870	Kallikrein-1		0.263306	-0.115713	P06870	Kallikrein-1	+	0.00939535	-3.3111
P10153	Non-secretory ribonuclease		0.909275	0.270156	P10153	Non-secretory ribonuclease	+	0.008375	-1.88293	P10153	Non-secretory ribonuclease		0.499968	-0.369437	P10153	Non-secretory ribonuclease		0.671748	0.030302	P10153	Non-secretory ribonuclease	+	0.0210323	1.74223	P10153	Non-secretory ribonuclease		0.660163	0.608601	P10153	Non-secretory ribonuclease		0.528248	2.38457	P10153	Non-secretory ribonuclease		0.807603	1.36506	P10153	Non-secretory ribonuclease		0.717701	1.85643	P10153	Non-secretory ribonuclease		0.469344	0.453011
P05546	Heparin cofactor 2	+	0.0100606	-3.45098	P05546	Heparin cofactor 2	+	0.0044	-1.59114	P05546	Heparin cofactor 2		0.376198	-2.14159	P05546	Heparin cofactor 2	+	0	-3.55689	P05546	Heparin cofactor 2		0.208692	-0.986848	P05546	Heparin cofactor 2		0.661082	0.395795	P05546	Heparin cofactor 2		0.530375	0.262488	P05546	Heparin cofactor 2	+	0.0246102	-3.36631	P05546	Heparin cofactor 2		0.0554286	-1.42593	P05546	Heparin cofactor 2		0.156241	-2.06549
O00299	Chloride intracellular channel protein 1	+	0.011	-4.30944	O00299	Chloride intracellular channel protein 1	+	0.00375758	-4.67089	O00299	Chloride intracellular channel protein 1	+	0	-4.58322	O00299	Chloride intracellular channel protein 1	+	0.00741176	-2.6292	O00299	Chloride intracellular channel protein 1	+	0.00738462	-3.93181	O00299	Chloride intracellular channel protein 1		0.102129	-3.73165	O00299	Chloride intracellular channel protein 1	+	0	-4.07634	O00299	Chloride intracellular channel protein 1	+	0.0093913	-3.61191	O00299	Chloride intracellular channel protein 1	+	0.01175	-5.1732	O00299	Chloride intracellular channel protein 1	+	0.006	-5.78223
P06331	Immunoglobulin heavy variable 4-34		0.401937	-0.0451651	P06331	Immunoglobulin heavy variable 4-34	+	0.0244681	-2.26128	P06331	Immunoglobulin heavy variable 4-34		0.280885	-0.790433	P06331	Immunoglobulin heavy variable 4-34		0.395664	-0.921494	P06331	Immunoglobulin heavy variable 4-34		0.708545	-0.634747	P06331	Immunoglobulin heavy variable 4-34		0.490286	-0.0302677	P06331	Immunoglobulin heavy variable 4-34	+	0.0171667	-1.18184	P06331	Immunoglobulin heavy variable 4-34	+	0.0114737	-1.51487	P06331	Immunoglobulin heavy variable 4-34		0.645984	0.652658	P06331	Immunoglobulin heavy variable 4-34		0.2526	-1.51101
P08758	Annexin A5	+	0.0301124	-3.08271	P08758	Annexin A5	+	0.00302439	-3.5132	P08758	Annexin A5	+	0.0160625	-3.29367	P08758	Annexin A5	+	0.0227937	-3.78222	P08758	Annexin A5	+	0.0498028	-1.9981	P08758	Annexin A5		0.215864	-2.08163	P08758	Annexin A5	+	0.0101818	-3.21631	P08758	Annexin A5	+	0.011	-4.17828	P08758	Annexin A5	+	0.0506667	-2.52409	P08758	Annexin A5	+	0.00917647	-4.33027
P28799	Progranulin	+	0.0479216	-2.09954	P28799	Progranulin		0.0756174	-1.37786	P28799	Progranulin	+	0.02496	-2.78347	P28799	Progranulin		0.118392	-2.76683	P28799	Progranulin	+	0.0505143	-2.45913	P28799	Progranulin		0.2554	-0.739104	P28799	Progranulin		0.0842667	-1.81565	P28799	Progranulin		0.0965	-1.90867	P28799	Progranulin		0.177928	-1.67532	P28799	Progranulin	+	0.027191	-2.88522
P59666	Neutrophil defensin 3		0.104519	3.00946	P59666	Neutrophil defensin 3		0.0889655	2.51488	P59666	Neutrophil defensin 3		0.30386	3.03044	P59666	Neutrophil defensin 3		0.0800421	2.11589	P59666	Neutrophil defensin 3		0.369517	2.3235	P59666	Neutrophil defensin 3		0.111188	2.63297	P59666	Neutrophil defensin 3		0.216667	1.05006	P59666	Neutrophil defensin 3		0.861925	-0.0483351	P59666	Neutrophil defensin 3		0.6444	0.149662	P59666	Neutrophil defensin 3		0.698618	0.765024
P02461	Collagen alpha-1(III) chain	+	0.0345376	-3.06204	P02461	Collagen alpha-1(III) chain	+	0	-2.95433	P02461	Collagen alpha-1(III) chain	+	0.00751515	-2.97976	P02461	Collagen alpha-1(III) chain	+	0.00427586	-1.7376	P02461	Collagen alpha-1(III) chain	+	0.00728889	-2.28573	P02461	Collagen alpha-1(III) chain	+	0.0187368	-1.79825	P02461	Collagen alpha-1(III) chain	+	0	-2.73279	P02461	Collagen alpha-1(III) chain	+	0.0118462	2.19729	P02461	Collagen alpha-1(III) chain		0.39275	-1.42473	P02461	Collagen alpha-1(III) chain	+	0.00415385	-2.93256
P81605	Dermcidin		0.107413	-1.41089	P81605	Dermcidin	+	0.0247312	-2.78082	P81605	Dermcidin	+	0.0175849	-4.83787	P81605	Dermcidin		0.196807	-1.46495	P81605	Dermcidin		0.0651084	-3.45023	P81605	Dermcidin		0.214437	-2.729	P81605	Dermcidin	+	0.00982456	-3.98612	P81605	Dermcidin		0.209263	-2.27251	P81605	Dermcidin		0.2505	-0.88572	P81605	Dermcidin	+	0.0243721	-2.53048
P14174	Macrophage migration inhibitory factor		0.222267	-1.23501	P14174	Macrophage migration inhibitory factor	+	0.0052381	-5.64839	P14174	Macrophage migration inhibitory factor		0.0951579	-3.92443	P14174	Macrophage migration inhibitory factor		0.55678	-0.0383472	P14174	Macrophage migration inhibitory factor		0.713731	0.54566	P14174	Macrophage migration inhibitory factor		0.214605	-5.15009	P14174	Macrophage migration inhibitory factor		0.675606	0.0859442	P14174	Macrophage migration inhibitory factor		0.9712	-0.440768	P14174	Macrophage migration inhibitory factor		0.523759	0.458242	P14174	Macrophage migration inhibitory factor	+	0.0114615	-5.59164
P02760	Protein AMBP	+	0.0122963	-4.4124	P02760	Protein AMBP	+	0	-3.6501	P02760	Protein AMBP	+	0.0163509	-4.17777	P02760	Protein AMBP	+	0.00496	-2.9097	P02760	Protein AMBP	+	0.0129412	-2.41378	P02760	Protein AMBP	+	0.0442222	-1.89283	P02760	Protein AMBP	+	0	-4.53048	P02760	Protein AMBP	+	0	-3.4607	P02760	Protein AMBP	+	0.0430833	-3.40205	P02760	Protein AMBP	+	0.00703448	-3.52998
P43490	Nicotinamide phosphoribosyltransferase		0.77403	-1.533	P43490	Nicotinamide phosphoribosyltransferase		0.586376	-0.0694036	P43490	Nicotinamide phosphoribosyltransferase		0.940936	-1.32159	P43490	Nicotinamide phosphoribosyltransferase		0.742061	-0.955081	P43490	Nicotinamide phosphoribosyltransferase		0.114043	2.93158	P43490	Nicotinamide phosphoribosyltransferase	+	0.0178	3.05375	P43490	Nicotinamide phosphoribosyltransferase		0.102579	0.79874	P43490	Nicotinamide phosphoribosyltransferase		0.326019	0.386459	P43490	Nicotinamide phosphoribosyltransferase		0.929518	-0.780729	P43490	Nicotinamide phosphoribosyltransferase		0.371437	1.45798
P26641	Elongation factor 1-gamma	+	0.0186667	-6.59786	P26641	Elongation factor 1-gamma		0.291659	-0.679758	P26641	Elongation factor 1-gamma	+	0.0106286	-4.73642	P26641	Elongation factor 1-gamma	+	0.0258125	-7.00792	P26641	Elongation factor 1-gamma	+	0.0508333	-4.45054	P26641	Elongation factor 1-gamma	+	0.0177143	-5.18011	P26641	Elongation factor 1-gamma		0.167759	-1.63322	P26641	Elongation factor 1-gamma	+	0.0242353	-6.34835	P26641	Elongation factor 1-gamma		0.052918	-5.55818	P26641	Elongation factor 1-gamma	+	0.0158933	-6.06215
[truncated: 35 more columns]
