# Supplementary material
Source: Research Square preprint supplement (doi:10.21203/rs.3.rs-8967608/v1)
Supplement: Supplementary file 4 [file e98057a8190240421d7a1580.xlsx]

## Sheet: Arkusz1
Table S1. Results of quantitative proteomic analysis of each sialolith sample (control: respective saliva sample collected from the same patient)
salivary stone #1 vs saliva #1					salivary stone #2 vs saliva #2					salivary stone #3 vs saliva #3					salivary stone #4 vs saliva #4					salivary stone #5 vs saliva #5					salivary stone #6 vs saliva #6
Accession	Protein	Significance	p-value	log2(Fold Change)	Accession	Protein	Significance	p-value	log2(Fold Change)	Accession	Protein	Significance	p-value	log2(Fold Change)	Accession	Protein	Significance	p-value	log2(Fold Change)	Accession	Protein	Significance	p-value	log2(Fold Change)	Accession	Protein	Significance	p-value	log2(Fold Change)
P02788	Lactotransferrin	+	0.00830769	-1.21801	P02788	Lactotransferrin	+	0	-2.35219	P02788	Lactotransferrin	+	0.0143636	-3.35502	P02788	Lactotransferrin	+	0.0130526	-1.56637	P02788	Lactotransferrin		0.219681	0.160246	P02788	Lactotransferrin	+	0.0269268	-1.22488
P02768	Albumin	+	0.00658065	-1.79252	P02768	Albumin	+	0	-2.3421	P02768	Albumin	+	0.0440476	-3.01278	P02768	Albumin	+	0.0186	-1.50085	P02768	Albumin	+	0.00635897	-1.86371	P02768	Albumin	+	0.0173333	-1.22161
P05164	Myeloperoxidase	+	0.00614815	1.8853	P05164	Myeloperoxidase	+	0	-3.32027	P05164	Myeloperoxidase		0.944841	-0.758074	P05164	Myeloperoxidase	+	0.0171667	-0.533676	P05164	Myeloperoxidase		0.194018	-0.774527	P05164	Myeloperoxidase		0.277585	0.259739
P19013	Keratin, type II cytoskeletal 4	+	0.0154023	-3.73901	P19013	Keratin, type II cytoskeletal 4	+	0.0182737	-3.68936	P19013	Keratin, type II cytoskeletal 4	+	0.0142642	-2.89154	P19013	Keratin, type II cytoskeletal 4	+	0.0441481	-1.74147	P19013	Keratin, type II cytoskeletal 4	+	0.00326316	-3.27779	P19013	Keratin, type II cytoskeletal 4		0.486915	-0.511714
Q9HC84	Mucin-5B	+	0.00766667	-4.18344	Q9HC84	Mucin-5B	+	0.00156522	-2.30861	Q9HC84	Mucin-5B		0.317916	-1.40144	Q9HC84	Mucin-5B		0.0779149	-1.04825	Q9HC84	Mucin-5B		0.745471	0.350272	Q9HC84	Mucin-5B		0.90513	-0.820787
P01024	Complement C3	+	0.0068	-2.26318	P01024	Complement C3	+	0	-2.65291	P01024	Complement C3	+	0.0137455	-2.4791	P01024	Complement C3	+	0.0200976	-1.50538	P01024	Complement C3	+	0.003875	-2.68956	P01024	Complement C3	+	0	-2.2435
P02808	Statherin	+	0.0069697	-3.07996	P02808	Statherin	+	0.00276923	-1.15393	P02808	Statherin	+	0.0132632	-3.43775	P02808	Statherin		0.0631461	-1.03671	P02808	Statherin		0.620031	-0.976877	P02808	Statherin		0.440313	-0.349319
P02787	Serotransferrin	+	0.0065098	-1.7685	P02787	Serotransferrin		0.224067	-0.664596	P02787	Serotransferrin		0.212074	-2.05782	P02787	Serotransferrin		0.733797	-0.738719	P02787	Serotransferrin		0.0898667	-1.4964	P02787	Serotransferrin		0.221417	0.0664883
P15924	Desmoplakin		0.05252	-0.955187	P15924	Desmoplakin		0.628697	0.181991	P15924	Desmoplakin	+	0.0153939	-4.04086	P15924	Desmoplakin		0.0552727	-3.23833	P15924	Desmoplakin		0.193333	-1.61207	P15924	Desmoplakin		0.977943	0.843077
P0DUB6	Alpha-amylase 1A		0.0677692	-2.15583	P0DUB6	Alpha-amylase 1A	+	0.00280519	-1.35203	P0DUB6	Alpha-amylase 1A	+	0.0257143	-2.70631	P0DUB6	Alpha-amylase 1A		0.172714	-1.08882	P0DUB6	Alpha-amylase 1A	+	0.0470649	-2.49772	P0DUB6	Alpha-amylase 1A		0.797313	-0.656958
P68871	Hemoglobin subunit beta	+	0.0085	-3.35037	P68871	Hemoglobin subunit beta		0.854696	2.18879	P68871	Hemoglobin subunit beta	+	0.0126	-2.75154	P68871	Hemoglobin subunit beta	+	0.0158462	-1.08264	P68871	Hemoglobin subunit beta	+	0	2.2048	P68871	Hemoglobin subunit beta		0.326916	1.29536
P13646	Keratin, type I cytoskeletal 13	+	0.00582857	-2.84055	P13646	Keratin, type I cytoskeletal 13	+	0	-2.16642	P13646	Keratin, type I cytoskeletal 13	+	0.0444651	-1.91931	P13646	Keratin, type I cytoskeletal 13	+	0.0166316	-1.67359	P13646	Keratin, type I cytoskeletal 13	+	0.0117931	-1.56345	P13646	Keratin, type I cytoskeletal 13		0.861912	-1.45521
P61626	Lysozyme C		0.0555644	0.311548	P61626	Lysozyme C	+	0	5.19566	P61626	Lysozyme C	+	0.014	-1.6831	P61626	Lysozyme C		0.738365	-0.0910702	P61626	Lysozyme C	+	0	2.39595	P61626	Lysozyme C	+	0.012	1.73399
P01023	Alpha-2-macroglobulin		0.546321	0.0781269	P01023	Alpha-2-macroglobulin	+	0	-1.81906	P01023	Alpha-2-macroglobulin		0.0938144	-1.07305	P01023	Alpha-2-macroglobulin		0.119068	-0.652148	P01023	Alpha-2-macroglobulin		0.112792	-0.953526	P01023	Alpha-2-macroglobulin	+	0.0435472	-0.974721
P69905	Hemoglobin subunit alpha	+	0.009	-2.00153	P69905	Hemoglobin subunit alpha	+	0	-2.58307	P69905	Hemoglobin subunit alpha	+	0.0123934	-3.00908	P69905	Hemoglobin subunit alpha	+	0.0176949	-2.64206	P69905	Hemoglobin subunit alpha	+	0.00427586	-0.773382	P69905	Hemoglobin subunit alpha	+	0.0241818	-1.51353
P08311	Cathepsin G		0.877985	-0.456099	P08311	Cathepsin G	+	0.0125652	-1.52719	P08311	Cathepsin G		0.512409	-1.57558	P08311	Cathepsin G		0.261705	-0.418558	P08311	Cathepsin G		0.128848	-0.422541	P08311	Cathepsin G		0.226598	0.183113
P0DOX5	Immunoglobulin gamma-1 heavy chain		0.263496	-1.04471	P0DOX5	Immunoglobulin gamma-1 heavy chain	+	0	-2.8964	P0DOX5	Immunoglobulin gamma-1 heavy chain	+	0.0231579	-0.551667	P0DOX5	Immunoglobulin gamma-1 heavy chain		0.0624444	-1.15706	P0DOX5	Immunoglobulin gamma-1 heavy chain	+	0	-1.29412	P0DOX5	Immunoglobulin gamma-1 heavy chain		0.170651	-2.6461
P01876	Immunoglobulin heavy constant alpha 1		0.117189	-1.62251	P01876	Immunoglobulin heavy constant alpha 1	+	0.0363495	-2.79295	P01876	Immunoglobulin heavy constant alpha 1		0.14835	-1.54335	P01876	Immunoglobulin heavy constant alpha 1	+	0.0452658	-1.0926	P01876	Immunoglobulin heavy constant alpha 1	+	0.0317681	-2.94869	P01876	Immunoglobulin heavy constant alpha 1		0.241333	-0.427928
P01833	Polymeric immunoglobulin receptor		0.0896981	-3.72934	P01833	Polymeric immunoglobulin receptor	+	0	-4.24799	P01833	Polymeric immunoglobulin receptor		0.523101	-1.49675	P01833	Polymeric immunoglobulin receptor	+	0.0147143	-2.31165	P01833	Polymeric immunoglobulin receptor		0.958101	0.241488	P01833	Polymeric immunoglobulin receptor	+	0.0317143	-2.43705
P20160	Azurocidin	+	0.00868421	1.00843	P20160	Azurocidin		0.801126	0.136833	P20160	Azurocidin		0.146931	0.473812	P20160	Azurocidin	+	0.0326667	1.05537	P20160	Azurocidin		0.0942174	-0.375292	P20160	Azurocidin	+	0.0400769	1.36063
P01037	Cystatin-SN	+	0.0429495	-2.19499	P01037	Cystatin-SN	+	0	-3.16494	P01037	Cystatin-SN	+	0.0129412	-2.61363	P01037	Cystatin-SN	+	0	-2.09584	P01037	Cystatin-SN		0.164583	-0.517402	P01037	Cystatin-SN	+	0.0253333	-1.32615
P08779	Keratin, type I cytoskeletal 16		0.449519	-1.80449	P08779	Keratin, type I cytoskeletal 16	+	0.0493084	-0.658009	P08779	Keratin, type I cytoskeletal 16		0.308881	-2.93425	P08779	Keratin, type I cytoskeletal 16		0.083102	-2.10579	P08779	Keratin, type I cytoskeletal 16		0.44432	0.360115	P08779	Keratin, type I cytoskeletal 16	+	0.006	1.89367
P0C0L4	Complement C4-A	+	0.00582456	-2.93533	P0C0L4	Complement C4-A	+	0.0180833	-2.78036	P0C0L4	Complement C4-A	+	0.0241096	-2.59002	P0C0L4	Complement C4-A	+	0.0281194	-1.94162	P0C0L4	Complement C4-A		0.111629	-0.793961	P0C0L4	Complement C4-A		0.108853	-1.17619
P06702	Protein S100-A9		0.972738	-0.0727501	P06702	Protein S100-A9	+	0.0117778	-1.21705	P06702	Protein S100-A9		0.498698	0.548716	P06702	Protein S100-A9	+	0.0458462	0.851551	P06702	Protein S100-A9		0.162314	-0.950277	P06702	Protein S100-A9		0.828504	0.671686
P04264	Keratin, type II cytoskeletal 1		0.283967	-0.548283	P04264	Keratin, type II cytoskeletal 1		0.199424	-0.683878	P04264	Keratin, type II cytoskeletal 1	+	0.0127	-2.13816	P04264	Keratin, type II cytoskeletal 1	+	0.0168163	4.06805	P04264	Keratin, type II cytoskeletal 1		0.121347	0.965689	P04264	Keratin, type II cytoskeletal 1		0.984397	1.98074
P02814	Submaxillary gland androgen-regulated protein 3B	+	0.0319158	-2.62296	P02814	Submaxillary gland androgen-regulated protein 3B	+	0.00824691	-4.8644	P02814	Submaxillary gland androgen-regulated protein 3B	+	0.0146667	-3.1848	P02814	Submaxillary gland androgen-regulated protein 3B	+	0.0124	-1.51625	P02814	Submaxillary gland androgen-regulated protein 3B		0.072093	-3.16522	P02814	Submaxillary gland androgen-regulated protein 3B		0.145542	-0.680192
P04083	Annexin A1	+	0	-4.22916	P04083	Annexin A1	+	0	-2.91198	P04083	Annexin A1	+	0.0145143	-3.66372	P04083	Annexin A1		0.126857	-0.843974	P04083	Annexin A1	+	0	-2.09764	P04083	Annexin A1		0.24332	-0.309854
P05109	Protein S100-A8		0.244957	4.87888	P05109	Protein S100-A8		0.427781	-0.0691738	P05109	Protein S100-A8		0.226109	6.25911	P05109	Protein S100-A8	+	0	3.98299	P05109	Protein S100-A8	+	0	3.82639	P05109	Protein S100-A8		0.120439	3.76034
P13647	Keratin, type II cytoskeletal 5	+	0.00485714	-2.15411	P13647	Keratin, type II cytoskeletal 5	+	0.0111264	-1.43771	P13647	Keratin, type II cytoskeletal 5	+	0.01512	-3.97437	P13647	Keratin, type II cytoskeletal 5		0.651882	-0.291067	P13647	Keratin, type II cytoskeletal 5		0.428065	-0.448101	P13647	Keratin, type II cytoskeletal 5		0.441298	1.10462
Q6MZM9	Proline-rich protein 27		0.113855	-1.6984	Q6MZM9	Proline-rich protein 27	+	0	-4.40215	Q6MZM9	Proline-rich protein 27	+	0.0154286	-2.78891	Q6MZM9	Proline-rich protein 27	+	0.0255625	-0.920387	Q6MZM9	Proline-rich protein 27	+	0.00344444	-2.52932	Q6MZM9	Proline-rich protein 27	+	0.0246667	-2.08178
P13645	Keratin, type I cytoskeletal 10	+	0.00618182	-2.36244	P13645	Keratin, type I cytoskeletal 10	+	0.011	-1.81711	P13645	Keratin, type I cytoskeletal 10		0.302701	-1.8684	P13645	Keratin, type I cytoskeletal 10		0.111333	0.88814	P13645	Keratin, type I cytoskeletal 10		0.108213	-1.06768	P13645	Keratin, type I cytoskeletal 10	+	0.0253714	-0.580397
P08246	Neutrophil elastase	+	0.0135	-2.19333	P08246	Neutrophil elastase	+	0	-2.86657	P08246	Neutrophil elastase	+	0.0152	-2.63085	P08246	Neutrophil elastase	+	0.017913	-3.36469	P08246	Neutrophil elastase	+	0.00563636	-2.02843	P08246	Neutrophil elastase	+	0.03552	-2.47764
P02675	Fibrinogen beta chain		0.0567379	-1.34499	P02675	Fibrinogen beta chain		0.0892252	0.902774	P02675	Fibrinogen beta chain		0.149154	-2.48812	P02675	Fibrinogen beta chain	+	0.00953846	-2.034	P02675	Fibrinogen beta chain		0.0516543	-1.02187	P02675	Fibrinogen beta chain		0.398198	-2.09461
P35579	Myosin-9		0.117857	-1.39347	P35579	Myosin-9	+	0.003	-3.82465	P35579	Myosin-9	+	0.0185075	-2.95143	P35579	Myosin-9		0.143259	-1.84557	P35579	Myosin-9	+	0.0322353	-4.05513	P35579	Myosin-9		0.111532	-2.84534
P01009	Alpha-1-antitrypsin	+	0.006	-3.89	P01009	Alpha-1-antitrypsin	+	0.00291892	-1.83619	P01009	Alpha-1-antitrypsin		0.12812	-0.841755	P01009	Alpha-1-antitrypsin	+	0.0128276	-1.816	P01009	Alpha-1-antitrypsin	+	0.0304444	-1.38992	P01009	Alpha-1-antitrypsin		0.176409	-1.25359
P35908	Keratin, type II cytoskeletal 2 epidermal	+	0.012	-2.80401	P35908	Keratin, type II cytoskeletal 2 epidermal	+	0	-2.62493	P35908	Keratin, type II cytoskeletal 2 epidermal	+	0.0122222	-2.67261	P35908	Keratin, type II cytoskeletal 2 epidermal	+	0	-2.04515	P35908	Keratin, type II cytoskeletal 2 epidermal	+	0.0313433	-1.78961	P35908	Keratin, type II cytoskeletal 2 epidermal	+	0.03704	-0.706358
P30740	Leukocyte elastase inhibitor	+	0.0399184	-0.916409	P30740	Leukocyte elastase inhibitor	+	0.00284211	-2.40087	P30740	Leukocyte elastase inhibitor	+	0.012	-1.94788	P30740	Leukocyte elastase inhibitor	+	0.0174	-1.37351	P30740	Leukocyte elastase inhibitor	+	0	-3.24871	P30740	Leukocyte elastase inhibitor		0.402607	-0.47246
P35527	Keratin, type I cytoskeletal 9	+	0.0097284	-1.67526	P35527	Keratin, type I cytoskeletal 9	+	0	-2.60357	P35527	Keratin, type I cytoskeletal 9	+	0.0154375	-1.58366	P35527	Keratin, type I cytoskeletal 9	+	0.0471807	1.75477	P35527	Keratin, type I cytoskeletal 9		0.108043	-0.514239	P35527	Keratin, type I cytoskeletal 9		0.0505263	-1.06976
P02810	Salivary acidic proline-rich phosphoprotein 1/2		0.228414	-1.12374	P02810	Salivary acidic proline-rich phosphoprotein 1/2	+	0	-1.97418	P02810	Salivary acidic proline-rich phosphoprotein 1/2	+	0.031	-2.40609	P02810	Salivary acidic proline-rich phosphoprotein 1/2	+	0.0313529	-0.928169	P02810	Salivary acidic proline-rich phosphoprotein 1/2	+	0.00775	4.29455	P02810	Salivary acidic proline-rich phosphoprotein 1/2	+	0	1.97871
P07355	Annexin A2	+	0.006375	-4.06958	P07355	Annexin A2	+	0.0043038	-3.95076	P07355	Annexin A2	+	0.0183333	-5.41924	P07355	Annexin A2		0.109069	-2.68536	P07355	Annexin A2	+	0.00649057	-4.17786	P07355	Annexin A2	+	0.0269091	-3.18856
P02647	Apolipoprotein A-I	+	0.00463636	-2.47589	P02647	Apolipoprotein A-I	+	0	-4.48535	P02647	Apolipoprotein A-I	+	0.0149412	-4.09451	P02647	Apolipoprotein A-I	+	0.0143077	-2.62096	P02647	Apolipoprotein A-I		0.0900659	-1.49071	P02647	Apolipoprotein A-I		0.072169	-0.719202
P00738	Haptoglobin	+	0.0107368	-1.32063	P00738	Haptoglobin	+	0.0127033	-1.36234	P00738	Haptoglobin		0.982457	-0.550106	P00738	Haptoglobin	+	0.0161569	-0.900927	P00738	Haptoglobin		0.343372	-0.137671	P00738	Haptoglobin	+	0.0408627	-1.23541
P12273	Prolactin-inducible protein	+	0.0183736	-1.2263	P12273	Prolactin-inducible protein		0.0869455	-1.03654	P12273	Prolactin-inducible protein		0.842756	-1.11816	P12273	Prolactin-inducible protein	+	0.019619	-2.899	P12273	Prolactin-inducible protein		0.0894831	-2.88001	P12273	Prolactin-inducible protein		0.0635224	-1.46538
P04406	Glyceraldehyde-3-phosphate dehydrogenase	+	0.00626415	-3.45261	P04406	Glyceraldehyde-3-phosphate dehydrogenase	+	0	-4.00186	P04406	Glyceraldehyde-3-phosphate dehydrogenase	+	0.0237838	-3.63562	P04406	Glyceraldehyde-3-phosphate dehydrogenase	+	0.0175319	-2.651	P04406	Glyceraldehyde-3-phosphate dehydrogenase	+	0.00826667	-1.07784	P04406	Glyceraldehyde-3-phosphate dehydrogenase	+	0.0427407	-1.81203
P03973	Antileukoproteinase		0.861313	0.775114	P03973	Antileukoproteinase	+	0.02	-1.47112	P03973	Antileukoproteinase	+	0.0142069	-4.02082	P03973	Antileukoproteinase	+	0.0134054	-2.53849	P03973	Antileukoproteinase		0.0586353	-1.34383	P03973	Antileukoproteinase		0.627082	0.0696049
P25311	Zinc-alpha-2-glycoprotein	+	0.0299574	-1.38176	P25311	Zinc-alpha-2-glycoprotein	+	0.00154286	-3.08711	P25311	Zinc-alpha-2-glycoprotein	+	0.0121935	-2.4066	P25311	Zinc-alpha-2-glycoprotein	+	0.0494286	-1.7464	P25311	Zinc-alpha-2-glycoprotein		0.194945	-0.666393	P25311	Zinc-alpha-2-glycoprotein		0.175604	-3.42184
Q96DA0	Pancreatic adenocarcinoma up-regulated factor		0.206678	0.193428	Q96DA0	Pancreatic adenocarcinoma up-regulated factor		0.335841	-0.462857	Q96DA0	Pancreatic adenocarcinoma up-regulated factor		0.0693778	-0.555625	Q96DA0	Pancreatic adenocarcinoma up-regulated factor	+	0.0149818	-2.69852	Q96DA0	Pancreatic adenocarcinoma up-regulated factor		0.247304	-0.314974	Q96DA0	Pancreatic adenocarcinoma up-regulated factor		0.480855	-0.248561
P04040	Catalase	+	0.0051	-2.8851	P04040	Catalase	+	0.0197959	-1.95155	P04040	Catalase	+	0.0148235	-2.65694	P04040	Catalase	+	0.0198095	-1.80671	P04040	Catalase		0.108211	-0.768865	P04040	Catalase		0.617091	-0.0138016
Q04695	Keratin, type I cytoskeletal 17		0.0893333	-0.384438	Q04695	Keratin, type I cytoskeletal 17		0.0581481	-4.03973	Q04695	Keratin, type I cytoskeletal 17	+	0.0135	-3.66737	Q04695	Keratin, type I cytoskeletal 17		0.399206	-0.072546	Q04695	Keratin, type I cytoskeletal 17		0.425484	-0.0223398	Q04695	Keratin, type I cytoskeletal 17		0.0849863	1.06895
Q9UGM3	Scavenger receptor cysteine-rich domain-containing protein DMBT1		0.907088	-0.230735	Q9UGM3	Scavenger receptor cysteine-rich domain-containing protein DMBT1		0.24482	-0.962827	Q9UGM3	Scavenger receptor cysteine-rich domain-containing protein DMBT1	+	0.0294177	-2.04416	Q9UGM3	Scavenger receptor cysteine-rich domain-containing protein DMBT1		0.338935	-1.01424	Q9UGM3	Scavenger receptor cysteine-rich domain-containing protein DMBT1		0.169143	-0.747095	Q9UGM3	Scavenger receptor cysteine-rich domain-containing protein DMBT1		0.12345	1.67256
P12724	Eosinophil cationic protein	+	0.00816	2.46462	P12724	Eosinophil cationic protein	+	0	1.95776	P12724	Eosinophil cationic protein		0.255571	-0.492151	P12724	Eosinophil cationic protein	+	0	3.87247	P12724	Eosinophil cationic protein	+	0	3.92045	P12724	Eosinophil cationic protein	+	0	3.20807
P17213	Bactericidal permeability-increasing protein	+	0.036	-5.15473	P17213	Bactericidal permeability-increasing protein	+	0	-4.08618	P17213	Bactericidal permeability-increasing protein	+	0.0130256	-2.56926	P17213	Bactericidal permeability-increasing protein	+	0	-4.01069	P17213	Bactericidal permeability-increasing protein	+	0.00729412	-2.50692	P17213	Bactericidal permeability-increasing protein		0.516269	-0.452098
P59665	Neutrophil defensin 1	+	0.00706383	-2.76238	P59665	Neutrophil defensin 1		0.174667	-2.09137	P59665	Neutrophil defensin 1		0.23982	-1.73396	P59665	Neutrophil defensin 1		0.0653187	-1.85184	P59665	Neutrophil defensin 1		0.778015	0.228527	P59665	Neutrophil defensin 1	+	0.00685714	-2.39763
Q8NFU4	Follicular dendritic cell secreted peptide	+	0.00788571	-2.62094	Q8NFU4	Follicular dendritic cell secreted peptide	+	0	-3.78601	Q8NFU4	Follicular dendritic cell secreted peptide		0.0773043	-3.03429	Q8NFU4	Follicular dendritic cell secreted peptide	+	0.0137778	-2.98438	Q8NFU4	Follicular dendritic cell secreted peptide	+	0	-2.50734	Q8NFU4	Follicular dendritic cell secreted peptide	+	0.0297273	-2.307
P14618	Pyruvate kinase PKM	+	0.00536842	-3.64322	P14618	Pyruvate kinase PKM		0.920629	-0.505376	P14618	Pyruvate kinase PKM	+	0.0120952	-4.22928	P14618	Pyruvate kinase PKM	+	0.0251692	-1.58555	P14618	Pyruvate kinase PKM	+	0	-2.39359	P14618	Pyruvate kinase PKM		0.245267	-1.8773
P02679	Fibrinogen gamma chain	+	0.00741935	-3.00952	P02679	Fibrinogen gamma chain		0.264878	-0.524299	P02679	Fibrinogen gamma chain		0.5245	-2.03911	P02679	Fibrinogen gamma chain	+	0.0412632	-1.38838	P02679	Fibrinogen gamma chain		0.0510244	-2.72566	P02679	Fibrinogen gamma chain	+	0.0334783	-2.103
P22079	Lactoperoxidase		0.0935701	-2.15102	P22079	Lactoperoxidase	+	0	-4.11544	P22079	Lactoperoxidase	+	0.0204571	-2.77948	P22079	Lactoperoxidase	+	0.0137778	-2.2252	P22079	Lactoperoxidase		0.191103	-0.949634	P22079	Lactoperoxidase	+	0	-2.81251
P01859	Immunoglobulin heavy constant gamma 2		0.400535	2.62842	P01859	Immunoglobulin heavy constant gamma 2	+	0	-3.2168	P01859	Immunoglobulin heavy constant gamma 2	+	0.0244444	-2.45359	P01859	Immunoglobulin heavy constant gamma 2		0.191424	-0.734809	P01859	Immunoglobulin heavy constant gamma 2	+	0.0166102	-1.77366	P01859	Immunoglobulin heavy constant gamma 2		0.173287	-0.828556
Q96DR5	BPI fold-containing family A member 2	+	0.0071875	-1.52623	Q96DR5	BPI fold-containing family A member 2	+	0.00814634	-2.1323	Q96DR5	BPI fold-containing family A member 2		0.354149	-1.44849	Q96DR5	BPI fold-containing family A member 2		0.934314	-0.167233	Q96DR5	BPI fold-containing family A member 2		0.457937	-0.937709	Q96DR5	BPI fold-containing family A member 2		0.113	0.664849
P01036	Cystatin-S	+	0	-6.33909	P01036	Cystatin-S	+	0.0029589	-2.68308	P01036	Cystatin-S	+	0.0157143	-3.88461	P01036	Cystatin-S	+	0.0183111	-1.59309	P01036	Cystatin-S	+	0.00688	-1.97004	P01036	Cystatin-S	+	0.0306207	-5.13376
P11678	Eosinophil peroxidase		0.624818	-1.14725	P11678	Eosinophil peroxidase	+	0	-1.94118	P11678	Eosinophil peroxidase		0.149804	-2.50076	P11678	Eosinophil peroxidase	+	0.0477561	-1.00258	P11678	Eosinophil peroxidase		0.193615	-1.10663	P11678	Eosinophil peroxidase		0.0616508	-1.59635
P14923	Junction plakoglobin		0.318258	-0.628624	P14923	Junction plakoglobin	+	0.0497736	-3.42528	P14923	Junction plakoglobin		0.262877	-2.65179	P14923	Junction plakoglobin		0.173153	-4.08749	P14923	Junction plakoglobin		0.167346	-2.41454	P14923	Junction plakoglobin	+	0.0341538	-5.29703
P80511	Protein S100-A12	+	0.01275	-3.90553	P80511	Protein S100-A12	+	0	-4.12755	P80511	Protein S100-A12	+	0.0413333	-4.74661	P80511	Protein S100-A12	+	0.0169091	-4.77317	P80511	Protein S100-A12	+	0.0062	-2.50147	P80511	Protein S100-A12	+	0	-2.31298
P08670	Vimentin	+	0.018	-3.79255	P08670	Vimentin	+	0.0016875	-8.11496	P08670	Vimentin	+	0.0314286	-3.10044	P08670	Vimentin		0.0646087	-1.35119	P08670	Vimentin	+	0.00661538	-2.43151	P08670	Vimentin	+	0	-1.84756
P08727	Keratin, type I cytoskeletal 19	+	0.033875	-1.40047	P08727	Keratin, type I cytoskeletal 19	+	0.0278416	-1.55268	P08727	Keratin, type I cytoskeletal 19		0.819158	0.245465	P08727	Keratin, type I cytoskeletal 19		0.525771	-0.211724	P08727	Keratin, type I cytoskeletal 19	+	0.0308732	-0.519837	P08727	Keratin, type I cytoskeletal 19		0.218905	-0.0881853
P06733	Alpha-enolase	+	0.0145714	-2.35574	P06733	Alpha-enolase	+	0	-4.05316	P06733	Alpha-enolase	+	0.0133684	-2.62348	P06733	Alpha-enolase		0.949418	-0.00083065	P06733	Alpha-enolase	+	0.0284848	-2.18159	P06733	Alpha-enolase		0.388147	-0.309925
P08603	Complement factor H	+	0.0105238	-3.75522	P08603	Complement factor H	+	0.0102381	-2.74525	P08603	Complement factor H	+	0.01264	-2.94638	P08603	Complement factor H	+	0.0304571	-2.18678	P08603	Complement factor H	+	0	-3.48659	P08603	Complement factor H	+	0.0266	-2.5223
P0DOY2	Immunoglobulin lambda constant 2	+	0.00985	-2.59571	P0DOY2	Immunoglobulin lambda constant 2	+	0	-4.04079	P0DOY2	Immunoglobulin lambda constant 2	+	0.0131667	-4.30355	P0DOY2	Immunoglobulin lambda constant 2	+	0	-3.74252	P0DOY2	Immunoglobulin lambda constant 2	+	0.00716667	-2.74484	P0DOY2	Immunoglobulin lambda constant 2		0.0657647	-1.48038
P0DOX2	Immunoglobulin alpha-2 heavy chain		0.966229	-0.791406	P0DOX2	Immunoglobulin alpha-2 heavy chain		0.887223	0.333591	P0DOX2	Immunoglobulin alpha-2 heavy chain		0.495904	-0.976749	P0DOX2	Immunoglobulin alpha-2 heavy chain		0.405417	-0.00835705	P0DOX2	Immunoglobulin alpha-2 heavy chain		0.261552	2.27764	P0DOX2	Immunoglobulin alpha-2 heavy chain		0.0603279	3.084
P00747	Plasminogen	+	0.012	-2.37066	P00747	Plasminogen		0.0788991	-0.766596	P00747	Plasminogen	+	0.0130345	-1.38505	P00747	Plasminogen		0.57594	0.281003	P00747	Plasminogen		0.49125	0.120504	P00747	Plasminogen		0.426903	-0.638816
Q9UBG3	Cornulin	+	0.00997468	-2.44004	Q9UBG3	Cornulin	+	0.00163636	-2.04728	Q9UBG3	Cornulin	+	0.044	-2.76663	Q9UBG3	Cornulin	+	0.01648	-3.08945	Q9UBG3	Cornulin	+	0.00652632	-2.9357	Q9UBG3	Cornulin		0.176899	-1.9087
P24158	Myeloblastin	+	0.0155814	1.42832	P24158	Myeloblastin		0.376504	-0.530602	P24158	Myeloblastin		0.984879	-0.439976	P24158	Myeloblastin		0.32065	0.048625	P24158	Myeloblastin		0.0840909	0.72615	P24158	Myeloblastin		0.260923	0.44726
P54108	Cysteine-rich secretory protein 3	+	0.0403299	-2.44924	P54108	Cysteine-rich secretory protein 3	+	0	-1.34231	P54108	Cysteine-rich secretory protein 3	+	0.0115455	-3.18093	P54108	Cysteine-rich secretory protein 3		0.0544828	-2.44849	P54108	Cysteine-rich secretory protein 3		0.968257	1.12058	P54108	Cysteine-rich secretory protein 3		0.977612	-0.90594
P80188	Neutrophil gelatinase-associated lipocalin	+	0.0259355	-3.63613	P80188	Neutrophil gelatinase-associated lipocalin	+	0	-4.88313	P80188	Neutrophil gelatinase-associated lipocalin	+	0.0117037	-4.56387	P80188	Neutrophil gelatinase-associated lipocalin	+	0.0155	-3.46566	P80188	Neutrophil gelatinase-associated lipocalin	+	0.00885714	-3.15622	P80188	Neutrophil gelatinase-associated lipocalin	+	0.0288571	-2.39618
P01008	Antithrombin-III		0.0572941	-2.18906	P01008	Antithrombin-III	+	0	-2.78865	P01008	Antithrombin-III		0.206617	-2.37975	P01008	Antithrombin-III		0.18487	-1.78233	P01008	Antithrombin-III	+	0.029375	-3.3815	P01008	Antithrombin-III		0.803308	1.02322
P04004	Vitronectin	+	0.0102	-3.42748	P04004	Vitronectin	+	0	-3.93323	P04004	Vitronectin	+	0.0318	-3.94304	P04004	Vitronectin	+	0.01488	-2.9606	P04004	Vitronectin	+	0.00442857	-2.60096	P04004	Vitronectin	+	0.0229474	-2.27007
P02774	Vitamin D-binding protein	+	0.00949398	-3.15135	P02774	Vitamin D-binding protein	+	0	-3.97502	P02774	Vitamin D-binding protein	+	0.0168	-3.56234	P02774	Vitamin D-binding protein	+	0	-1.33235	P02774	Vitamin D-binding protein	+	0.00982456	-2.19609	P02774	Vitamin D-binding protein		0.24949	-0.792378
P08123	Collagen alpha-2(I) chain	+	0.00927273	-3.23151	P08123	Collagen alpha-2(I) chain	+	0	-1.10598	P08123	Collagen alpha-2(I) chain	+	0.0169091	-3.04501	P08123	Collagen alpha-2(I) chain	+	0	-2.43245	P08123	Collagen alpha-2(I) chain	+	0.00354286	-2.27026	P08123	Collagen alpha-2(I) chain	+	0.0290667	-3.48932
P01591	Immunoglobulin J chain	+	0.0214348	-3.098	P01591	Immunoglobulin J chain	+	0	-4.27757	P01591	Immunoglobulin J chain	+	0.0160851	-3.59658	P01591	Immunoglobulin J chain	+	0	-3.98168	P01591	Immunoglobulin J chain	+	0.00459259	-5.17184	P01591	Immunoglobulin J chain	+	0.0255385	-3.3341
P23280	Carbonic anhydrase 6		0.948029	1.00608	P23280	Carbonic anhydrase 6		0.130379	-3.19189	P23280	Carbonic anhydrase 6		0.883441	1.80222	P23280	Carbonic anhydrase 6		0.140655	1.01958	P23280	Carbonic anhydrase 6		0.921594	1.74603	P23280	Carbonic anhydrase 6		0.800458	-1.6941
P52209	6-phosphogluconate dehydrogenase, decarboxylating	+	0.00666667	-4.62545	P52209	6-phosphogluconate dehydrogenase, decarboxylating	+	0	-3.67968	P52209	6-phosphogluconate dehydrogenase, decarboxylating	+	0.0137333	-4.57877	P52209	6-phosphogluconate dehydrogenase, decarboxylating		0.0509767	-1.30913	P52209	6-phosphogluconate dehydrogenase, decarboxylating	+	0.00551111	-1.95876	P52209	6-phosphogluconate dehydrogenase, decarboxylating		0.0616615	-2.76011
P04114	Apolipoprotein B-100	+	0.00886957	-3.1645	P04114	Apolipoprotein B-100	+	0	-3.97217	P04114	Apolipoprotein B-100	+	0.0169231	-4.07466	P04114	Apolipoprotein B-100	+	0.0266667	-2.26443	P04114	Apolipoprotein B-100	+	0.0101818	-2.05902	P04114	Apolipoprotein B-100	+	0.0296	-3.25735
P02452	Collagen alpha-1(I) chain	+	0.00703448	-2.62463	P02452	Collagen alpha-1(I) chain		0.679403	-0.349522	P02452	Collagen alpha-1(I) chain	+	0.012875	-2.90126	P02452	Collagen alpha-1(I) chain	+	0.0145882	-2.07179	P02452	Collagen alpha-1(I) chain	+	0.00375758	-2.75113	P02452	Collagen alpha-1(I) chain	+	0	-2.48195
P02533	Keratin, type I cytoskeletal 14	+	0.00745946	-2.67811	P02533	Keratin, type I cytoskeletal 14		0.286368	-0.635303	P02533	Keratin, type I cytoskeletal 14		0.270539	-6.76366	P02533	Keratin, type I cytoskeletal 14		0.184069	-3.16846	P02533	Keratin, type I cytoskeletal 14	+	0.00576744	-5.637	P02533	Keratin, type I cytoskeletal 14		0.145741	-1.58777
Q8TAX7	Mucin-7		0.156637	-2.44211	Q8TAX7	Mucin-7	+	0	-2.44597	Q8TAX7	Mucin-7	+	0.020169	-3.44734	Q8TAX7	Mucin-7		0.0762917	-1.52379	Q8TAX7	Mucin-7		0.226386	-0.863413	Q8TAX7	Mucin-7		0.218553	-0.473611
P02671	Fibrinogen alpha chain	+	0.00603636	-3.59592	P02671	Fibrinogen alpha chain		0.919404	0.109761	P02671	Fibrinogen alpha chain		0.0928571	-1.68702	P02671	Fibrinogen alpha chain	+	0.0447	-1.88446	P02671	Fibrinogen alpha chain		0.3261	-0.793878	P02671	Fibrinogen alpha chain		0.704352	-0.505339
P00558	Phosphoglycerate kinase 1	+	0.00566667	-3.99539	P00558	Phosphoglycerate kinase 1	+	0.00288	-2.63242	P00558	Phosphoglycerate kinase 1	+	0.0164348	-4.57432	P00558	Phosphoglycerate kinase 1	+	0.0155	-3.84829	P00558	Phosphoglycerate kinase 1	+	0.0062	-3.36072	P00558	Phosphoglycerate kinase 1	+	0.0249	-1.72565
O75594	Peptidoglycan recognition protein 1		0.540092	-0.843072	O75594	Peptidoglycan recognition protein 1	+	0.0108764	-2.22536	O75594	Peptidoglycan recognition protein 1		0.566046	0.294779	O75594	Peptidoglycan recognition protein 1		0.229345	-1.57644	O75594	Peptidoglycan recognition protein 1		0.647515	-0.788787	O75594	Peptidoglycan recognition protein 1	+	0.0336327	4.00042
P62805	Histone H4	+	0.00777465	-1.90444	P62805	Histone H4	+	0.0321176	-2.79946	P62805	Histone H4	+	0.0137391	-3.60528	P62805	Histone H4	+	0.0150303	-2.29666	P62805	Histone H4	+	0.00731915	-1.2486	P62805	Histone H4		0.121926	-3.15709
Q6P5S2	Protein LEG1 homolog	+	0.00497561	-2.39071	Q6P5S2	Protein LEG1 homolog		0.457354	-0.19873	Q6P5S2	Protein LEG1 homolog		0.154781	-1.25482	Q6P5S2	Protein LEG1 homolog	+	0.0155	-2.14552	Q6P5S2	Protein LEG1 homolog		0.999121	0.459523	Q6P5S2	Protein LEG1 homolog		0.338593	-0.265109
P02042	Hemoglobin subunit delta	+	0.00737778	-2.75699	P02042	Hemoglobin subunit delta	+	0	-3.20051	P02042	Hemoglobin subunit delta	+	0.0141111	-3.02683	P02042	Hemoglobin subunit delta	+	0.00885714	-2.25173	P02042	Hemoglobin subunit delta	+	0.00702041	-3.14294	P02042	Hemoglobin subunit delta	+	0.0261176	-2.23334
P02766	Transthyretin	+	0.00677551	-3.09476	P02766	Transthyretin	+	0	-2.64619	P02766	Transthyretin		0.463	-0.184192	P02766	Transthyretin		0.864115	1.86253	P02766	Transthyretin	+	0.00364706	-2.8065	P02766	Transthyretin	+	0	-4.21102
P62937	Peptidyl-prolyl cis-trans isomerase A	+	0.00474419	-2.22837	P62937	Peptidyl-prolyl cis-trans isomerase A	+	0	-5.86138	P62937	Peptidyl-prolyl cis-trans isomerase A	+	0.022	-3.34218	P62937	Peptidyl-prolyl cis-trans isomerase A	+	0.0211282	-3.77922	P62937	Peptidyl-prolyl cis-trans isomerase A	+	0.00516667	-3.14909	P62937	Peptidyl-prolyl cis-trans isomerase A	+	0	-2.22421
P02765	Alpha-2-HS-glycoprotein	+	0.00971429	-3.29367	P02765	Alpha-2-HS-glycoprotein	+	0	-4.14744	P02765	Alpha-2-HS-glycoprotein	+	0.0182353	-2.85832	P02765	Alpha-2-HS-glycoprotein	+	0.0155472	-1.83391	P02765	Alpha-2-HS-glycoprotein	+	0	-3.14656	P02765	Alpha-2-HS-glycoprotein		0.723746	0.01441
P09211	Glutathione S-transferase P	+	0.00784615	-4.01856	P09211	Glutathione S-transferase P		0.11007	-0.887973	P09211	Glutathione S-transferase P		0.256212	-1.06923	P09211	Glutathione S-transferase P	+	0.0331268	-1.76349	P09211	Glutathione S-transferase P	+	0.0287742	-3.24639	P09211	Glutathione S-transferase P		0.201261	-1.42473
P02743	Serum amyloid P-component	+	0.00707692	-2.2637	P02743	Serum amyloid P-component	+	0	-3.22468	P02743	Serum amyloid P-component	+	0.011814	-1.57949	P02743	Serum amyloid P-component	+	0.041974	-1.87698	P02743	Serum amyloid P-component		0.46485	-1.70045	P02743	Serum amyloid P-component		0.0711667	-1.97343
P02763	Alpha-1-acid glycoprotein 1		0.169368	-2.4002	P02763	Alpha-1-acid glycoprotein 1	+	0.02812	-1.75003	P02763	Alpha-1-acid glycoprotein 1	+	0.0468046	-1.60802	P02763	Alpha-1-acid glycoprotein 1	+	0.0152593	-3.31145	P02763	Alpha-1-acid glycoprotein 1	+	0.004	-2.50468	P02763	Alpha-1-acid glycoprotein 1		0.0732	-3.17904
P27105	Stomatin	+	0.0152273	-1.63893	P27105	Stomatin	+	0.00166154	-2.54281	P27105	Stomatin	+	0.0198889	-2.04075	P27105	Stomatin	+	0.0334795	-3.03881	P27105	Stomatin		0.0528675	-0.946885	P27105	Stomatin		0.392327	-0.121891
P07737	Profilin-1	+	0.0216	-4.33699	P07737	Profilin-1	+	0	-3.79098	P07737	Profilin-1	+	0.0112857	-4.16714	P07737	Profilin-1	+	0.0195789	-4.02797	P07737	Profilin-1	+	0.00563636	-3.68725	P07737	Profilin-1	+	0.0304186	-1.99529
P11142	Heat shock cognate 71 kDa protein		0.102165	-2.42601	P11142	Heat shock cognate 71 kDa protein	+	0.0135914	-3.39865	P11142	Heat shock cognate 71 kDa protein	+	0.0321446	-4.89706	P11142	Heat shock cognate 71 kDa protein		0.571642	-0.803503	P11142	Heat shock cognate 71 kDa protein	+	0.01	-1.45694	P11142	Heat shock cognate 71 kDa protein	+	0.0439273	-0.979099
P13727	Bone marrow proteoglycan		0.418312	-1.66725	P13727	Bone marrow proteoglycan		0.589466	0.618542	P13727	Bone marrow proteoglycan	+	0.0325366	-2.42819	P13727	Bone marrow proteoglycan		0.457692	-0.633027	P13727	Bone marrow proteoglycan		0.0565714	1.05011	P13727	Bone marrow proteoglycan		0.718047	-0.039712
P01011	Alpha-1-antichymotrypsin	+	0.00857143	-2.50795	P01011	Alpha-1-antichymotrypsin	+	0	-2.9937	P01011	Alpha-1-antichymotrypsin	+	0.0449882	-0.385258	P01011	Alpha-1-antichymotrypsin	+	0.0141714	-2.35037	P01011	Alpha-1-antichymotrypsin	+	0.0300274	-0.895267	P01011	Alpha-1-antichymotrypsin		0.0623729	-1.86112
P10909	Clusterin	+	0.00691667	-2.57422	P10909	Clusterin	+	0	-3.31411	P10909	Clusterin	+	0.0145385	-3.64752	P10909	Clusterin	+	0.0132857	-2.70042	P10909	Clusterin	+	0.00953846	-3.92273	P10909	Clusterin	+	0.0286452	-4.66548
Q9HD89	Resistin		0.694767	0.521194	Q9HD89	Resistin	+	0	-2.49321	Q9HD89	Resistin		0.328367	4.26302	Q9HD89	Resistin	+	0.0165333	2.75078	Q9HD89	Resistin		0.0725057	0.689174	Q9HD89	Resistin		0.471448	3.71904
P15153	Ras-related C3 botulinum toxin substrate 2	+	0.00766667	-2.24641	P15153	Ras-related C3 botulinum toxin substrate 2	+	0	-4.85091	P15153	Ras-related C3 botulinum toxin substrate 2	+	0.011	-3.16988	P15153	Ras-related C3 botulinum toxin substrate 2	+	0	-4.86016	P15153	Ras-related C3 botulinum toxin substrate 2	+	0.00747826	-1.60468	P15153	Ras-related C3 botulinum toxin substrate 2	+	0.024	-1.89164
P25705	ATP synthase subunit alpha, mitochondrial	+	0.027	-5.67993	P25705	ATP synthase subunit alpha, mitochondrial	+	0.00835	-2.2137	P25705	ATP synthase subunit alpha, mitochondrial	+	0.0132903	-3.77403	P25705	ATP synthase subunit alpha, mitochondrial	+	0.0343243	-2.6148	P25705	ATP synthase subunit alpha, mitochondrial	+	0.0053913	-3.84038	P25705	ATP synthase subunit alpha, mitochondrial		0.0626452	-3.26253
P31025	Lipocalin-1		0.273633	-6.49571	P31025	Lipocalin-1	+	0.0113882	-1.9278	P31025	Lipocalin-1		0.945324	-0.554936	P31025	Lipocalin-1		0.13929	-4.32504	P31025	Lipocalin-1	+	0.00413333	2.17625	P31025	Lipocalin-1		0.774031	1.46241
P23528	Cofilin-1	+	0.00728571	-4.55251	P23528	Cofilin-1	+	0.0421923	-2.85955	P23528	Cofilin-1	+	0.0275	-3.67157	P23528	Cofilin-1	+	0.020459	-1.50323	P23528	Cofilin-1	+	0.00496	-0.887018	P23528	Cofilin-1		0.0613333	-1.9703
P49913	Cathelicidin antimicrobial peptide	+	0.00755556	-2.47878	P49913	Cathelicidin antimicrobial peptide	+	0	-2.68716	P49913	Cathelicidin antimicrobial peptide	+	0.0137297	-1.52463	P49913	Cathelicidin antimicrobial peptide		0.0725161	-1.28038	P49913	Cathelicidin antimicrobial peptide	+	0.0404324	-2.00171	P49913	Cathelicidin antimicrobial peptide		0.633106	0.29005
P02652	Apolipoprotein A-II	+	0.00793103	-4.18808	P02652	Apolipoprotein A-II		0.428124	-0.651624	P02652	Apolipoprotein A-II		0.836896	-0.257914	P02652	Apolipoprotein A-II		0.532515	-0.599153	P02652	Apolipoprotein A-II		0.428098	0.0530882	P02652	Apolipoprotein A-II		0.111646	1.00809
P05107	Integrin beta-2	+	0.00638462	-1.90989	P05107	Integrin beta-2		0.115096	-0.970684	P05107	Integrin beta-2	+	0.0234667	-1.52565	P05107	Integrin beta-2		0.121077	-0.436543	P05107	Integrin beta-2	+	0.0486582	-0.914681	P05107	Integrin beta-2	+	0.047	-0.627515
P40199	Carcinoembryonic antigen-related cell adhesion molecule 6	+	0.00551351	-3.75129	P40199	Carcinoembryonic antigen-related cell adhesion molecule 6	+	0.0217778	-2.7932	P40199	Carcinoembryonic antigen-related cell adhesion molecule 6	+	0.02	-3.15619	P40199	Carcinoembryonic antigen-related cell adhesion molecule 6		0.393216	1.93002	P40199	Carcinoembryonic antigen-related cell adhesion molecule 6	+	0	-3.81324	P40199	Carcinoembryonic antigen-related cell adhesion molecule 6	+	0.0064	-5.88786
P08729	Keratin, type II cytoskeletal 7	+	0.00754098	-3.947	P08729	Keratin, type II cytoskeletal 7	+	0	-5.83739	P08729	Keratin, type II cytoskeletal 7		0.0764731	-2.83723	P08729	Keratin, type II cytoskeletal 7	+	0.012	-3.93625	P08729	Keratin, type II cytoskeletal 7	+	0.0298413	-2.71513	P08729	Keratin, type II cytoskeletal 7	+	0.0266667	-3.81466
P15515	Histatin-1	+	0.00981818	-3.18583	P15515	Histatin-1		0.831176	-0.156157	P15515	Histatin-1	+	0.0128136	-3.83875	P15515	Histatin-1	+	0.0191628	-0.468736	P15515	Histatin-1		0.646896	0.0320845	P15515	Histatin-1		0.259961	-0.646964
P31949	Protein S100-A11		0.926861	0.0625477	P31949	Protein S100-A11		0.219933	-0.394557	P31949	Protein S100-A11	+	0.0193623	-4.08278	P31949	Protein S100-A11		0.618637	1.0006	P31949	Protein S100-A11		0.499287	-0.184978	P31949	Protein S100-A11		0.177556	-3.09057
P10599	Thioredoxin		0.32454	-0.394956	P10599	Thioredoxin		0.0960708	-2.85995	P10599	Thioredoxin		0.397756	-0.37064	P10599	Thioredoxin	+	0.0418133	-2.00962	P10599	Thioredoxin	+	0.0398933	-1.11929	P10599	Thioredoxin		0.236898	-1.06373
P08493	Matrix Gla protein	+	0.0185778	-2.91946	P08493	Matrix Gla protein	+	0.0437333	0.472709	P08493	Matrix Gla protein		0.0575281	-2.18016	P08493	Matrix Gla protein		0.426312	1.69929	P08493	Matrix Gla protein	+	0.0313143	0.429047	P08493	Matrix Gla protein		0.720812	-0.0514984
P00751	Complement factor B	+	0.0136	-4.6794	P00751	Complement factor B	+	0.0160851	-4.14838	P00751	Complement factor B	+	0.01375	-4.85336	P00751	Complement factor B	+	0.0206	-3.35458	P00751	Complement factor B	+	0.00335135	-3.53201	P00751	Complement factor B	+	0.0278261	-3.92129
P01860	Immunoglobulin heavy constant gamma 3	+	0.0101026	-3.37024	P01860	Immunoglobulin heavy constant gamma 3	+	0	-6.71928	P01860	Immunoglobulin heavy constant gamma 3	+	0.0123902	-2.49069	P01860	Immunoglobulin heavy constant gamma 3	+	0.0177143	-3.57376	P01860	Immunoglobulin heavy constant gamma 3		0.21875	-1.63237	P01860	Immunoglobulin heavy constant gamma 3		0.14381	-3.05612
P05090	Apolipoprotein D	+	0.00686567	-1.27112	P05090	Apolipoprotein D	+	0	-2.23009	P05090	Apolipoprotein D		0.0781538	-1.02585	P05090	Apolipoprotein D		0.0770947	-1.12223	P05090	Apolipoprotein D	+	0.00590476	-1.71904	P05090	Apolipoprotein D		0.0528966	-1.50651
P01033	Metalloproteinase inhibitor 1	+	0.00730159	-2.3115	P01033	Metalloproteinase inhibitor 1		0.226182	-0.0296774	P01033	Metalloproteinase inhibitor 1		0.0539091	-1.82524	P01033	Metalloproteinase inhibitor 1		0.141945	-0.995828	P01033	Metalloproteinase inhibitor 1		0.145109	-1.05026	P01033	Metalloproteinase inhibitor 1	+	0.032766	-2.27834
P0DOX8	Immunoglobulin lambda-1 light chain	+	0.00664	-5.78431	P0DOX8	Immunoglobulin lambda-1 light chain	+	0.00152113	-5.10574	P0DOX8	Immunoglobulin lambda-1 light chain	+	0	-7.06469	P0DOX8	Immunoglobulin lambda-1 light chain	+	0.0206667	-9.07666	P0DOX8	Immunoglobulin lambda-1 light chain	+	0.0423158	-5.32133	P0DOX8	Immunoglobulin lambda-1 light chain		0.0692754	-3.28804
P01619	Immunoglobulin kappa variable 3-20	+	0.00523077	-3.75938	P01619	Immunoglobulin kappa variable 3-20	+	0	-2.82558	P01619	Immunoglobulin kappa variable 3-20	+	0.0115789	-2.56349	P01619	Immunoglobulin kappa variable 3-20	+	0.0308986	-1.59306	P01619	Immunoglobulin kappa variable 3-20	+	0.00476923	-2.81978	P01619	Immunoglobulin kappa variable 3-20		0.664161	0.204909
P41218	Myeloid cell nuclear differentiation antigen	+	0.00676471	-2.15858	P41218	Myeloid cell nuclear differentiation antigen	+	0.00161194	-3.24121	P41218	Myeloid cell nuclear differentiation antigen		0.0814316	-1.5252	P41218	Myeloid cell nuclear differentiation antigen		0.1004	1.17811	P41218	Myeloid cell nuclear differentiation antigen	+	0.0289231	-2.3463	P41218	Myeloid cell nuclear differentiation antigen		0.111487	-2.25178
P07996	Thrombospondin-1	+	0.0154286	-4.61374	P07996	Thrombospondin-1		0.0915	-2.70782	P07996	Thrombospondin-1	+	0.0366667	-3.11475	P07996	Thrombospondin-1	+	0.0161739	-3.23218	P07996	Thrombospondin-1	+	0.00604878	-3.22791	P07996	Thrombospondin-1	+	0	-3.79719
P23284	Peptidyl-prolyl cis-trans isomerase B		0.29535	-4.02088	P23284	Peptidyl-prolyl cis-trans isomerase B	+	0	-6.55158	P23284	Peptidyl-prolyl cis-trans isomerase B		0.0815833	-2.90693	P23284	Peptidyl-prolyl cis-trans isomerase B		0.181684	-1.78031	P23284	Peptidyl-prolyl cis-trans isomerase B		0.14176	-3.21978	P23284	Peptidyl-prolyl cis-trans isomerase B	+	0	1.87086
P25815	Protein S100-P	+	0.00721739	-4.91213	P25815	Protein S100-P	+	0	-6.80743	P25815	Protein S100-P		0.212147	-2.07782	P25815	Protein S100-P		0.183292	-3.30825	P25815	Protein S100-P		0.651759	-0.597539	P25815	Protein S100-P		0.806697	0.29516
P06870	Kallikrein-1	+	0.0131765	-2.56277	P06870	Kallikrein-1	+	0	-2.08644	P06870	Kallikrein-1		0.365705	-1.21637	P06870	Kallikrein-1		0.080866	-1.11346	P06870	Kallikrein-1	+	0.0464615	-2.41404	P06870	Kallikrein-1	+	0.02775	-2.39032
P10153	Non-secretory ribonuclease		0.94687	0.367432	P10153	Non-secretory ribonuclease	+	0.00158824	-2.70458	P10153	Non-secretory ribonuclease		0.521046	-0.526752	P10153	Non-secretory ribonuclease		0.256926	0.25288	P10153	Non-secretory ribonuclease	+	0.0276721	1.20901	P10153	Non-secretory ribonuclease		0.740992	-0.0867796
P05546	Heparin cofactor 2	+	0.00960976	-5.13497	P05546	Heparin cofactor 2	+	0	-1.9029	P05546	Heparin cofactor 2		0.770667	-1.59762	P05546	Heparin cofactor 2	+	0.0187273	-2.25018	P05546	Heparin cofactor 2		0.181245	-2.25953	P05546	Heparin cofactor 2		0.280229	-1.24795
O00299	Chloride intracellular channel protein 1	+	0.00592857	-4.3046	O00299	Chloride intracellular channel protein 1	+	0	-4.17838	O00299	Chloride intracellular channel protein 1	+	0.062	-4.26028	O00299	Chloride intracellular channel protein 1	+	0.020129	-2.90959	O00299	Chloride intracellular channel protein 1	+	0.00590476	-4.56236	O00299	Chloride intracellular channel protein 1		0.0644848	-3.71751
P06331	Immunoglobulin heavy variable 4-34		0.100815	-0.71143	P06331	Immunoglobulin heavy variable 4-34	+	0.0112558	-2.25338	P06331	Immunoglobulin heavy variable 4-34	+	0.0266154	-2.45713	P06331	Immunoglobulin heavy variable 4-34		0.134981	-1.16512	P06331	Immunoglobulin heavy variable 4-34	+	0.04805	-1.4044	P06331	Immunoglobulin heavy variable 4-34		0.868	-0.43408
P08758	Annexin A5	+	0.00779661	-4.40308	P08758	Annexin A5	+	0.00171429	-2.45362	P08758	Annexin A5		0.155396	-1.33287	P08758	Annexin A5		0.0858586	-2.6263	P08758	Annexin A5		0.260239	-0.892103	P08758	Annexin A5	+	0.0343333	-3.31022
P28799	Progranulin	+	0.00736	-2.18664	P28799	Progranulin	+	0	-2.2812	P28799	Progranulin	+	0.01575	-1.82744	P28799	Progranulin	+	0.0163448	-4.09303	P28799	Progranulin	+	0.00688889	-2.98844	P28799	Progranulin	+	0.0233684	-1.7345
P59666	Neutrophil defensin 3		0.28741	1.87674	P59666	Neutrophil defensin 3		0.676782	0.770849	P59666	Neutrophil defensin 3		0.274724	2.63626	P59666	Neutrophil defensin 3		0.0515765	1.89513	P59666	Neutrophil defensin 3		0.293492	2.16697	P59666	Neutrophil defensin 3		0.0606875	2.50777
P02461	Collagen alpha-1(III) chain	+	0.00756164	-3.75416	P02461	Collagen alpha-1(III) chain	+	0	-3.54902	P02461	Collagen alpha-1(III) chain	+	0.0121538	-2.94124	P02461	Collagen alpha-1(III) chain	+	0.0145882	-2.21436	P02461	Collagen alpha-1(III) chain	+	0.00637037	-2.42313	P02461	Collagen alpha-1(III) chain	+	0	-2.35371
P81605	Dermcidin	+	0.0108	-2.81041	P81605	Dermcidin	+	0.00174194	-3.58426	P81605	Dermcidin	+	0.0150476	-4.70488	P81605	Dermcidin		0.231467	-1.28704	P81605	Dermcidin	+	0.026	-4.23383	P81605	Dermcidin		0.200129	-3.30785
P14174	Macrophage migration inhibitory factor		0.262102	-0.313768	P14174	Macrophage migration inhibitory factor	+	0	-3.52153	P14174	Macrophage migration inhibitory factor		0.123596	-3.01197	P14174	Macrophage migration inhibitory factor	+	0	3.21204	P14174	Macrophage migration inhibitory factor		0.563138	3.27086	P14174	Macrophage migration inhibitory factor		0.5545	-2.23206
P02760	Protein AMBP	+	0.0113333	-5.16628	P02760	Protein AMBP	+	0.00804819	-3.46699	P02760	Protein AMBP	+	0.0329383	-3.3769	P02760	Protein AMBP	+	0.0103333	-4.62906	P02760	Protein AMBP	+	0.0067451	-3.27946	P02760	Protein AMBP		0.0881081	-2.37938
P43490	Nicotinamide phosphoribosyltransferase		0.322496	-1.06347	P43490	Nicotinamide phosphoribosyltransferase		0.280581	-0.285428	P43490	Nicotinamide phosphoribosyltransferase		0.884175	-1.05503	P43490	Nicotinamide phosphoribosyltransferase		0.46124	-3.84212	P43490	Nicotinamide phosphoribosyltransferase		0.303899	2.03045	P43490	Nicotinamide phosphoribosyltransferase	+	0.0328889	2.59454
P26641	Elongation factor 1-gamma	+	0.0150562	-3.98535	P26641	Elongation factor 1-gamma		0.844672	1.5748	P26641	Elongation factor 1-gamma		0.0756596	-2.27365	P26641	Elongation factor 1-gamma		0.19306	-3.20146	P26641	Elongation factor 1-gamma		0.642815	-0.0797205	P26641	Elongation factor 1-gamma	+	0	-4.5172
