# Supplementary material
Source: Research Square preprint supplement (doi:10.21203/rs.3.rs-8967608/v1)
Supplement: Supplementary file 5 [file f04df49a8854073d02c36182.xlsx]

## Sheet: Arkusz1
Table S1. Results of quantitative proteomic analysis of each sialolith sample (control: sialoliths (pooled))
salivary stone #1					salivary stone #2					salivary stone #3					salivary stone #4					salivary stone #5					salivary stone #6					salivary stone #A					salivary stone #B					salivary stone #C					salivary stone #D
Accession	Protein	Significance	p-value	log2(Fold Change)	Accession	Protein	Significance	p-value	log2(Fold Change)	Accession	Protein	Significance	p-value	log2(Fold Change)	Accession	Protein	Significance	p-value	log2(Fold Change)	Accession	Protein	Significance	p-value	log2(Fold Change)	Accession	Protein	Significance	p-value	log2(Fold Change)	Accession	Protein	Significance	p-value	log2(Fold Change)	Accession	Protein	Significance	p-value	log2(Fold Change)	Accession	Protein	Significance	p-value	log2(Fold Change)	Accession	Protein	Significance	p-value	log2(Fold Change)
P02788	Lactotransferrin	+	0	-1.29644	P02788	Lactotransferrin	+	0	-1.91545	P02788	Lactotransferrin	+	0.00476923	-3.24658	P02788	Lactotransferrin	+	0.0120889	-1.2401	P02788	Lactotransferrin		0.889353	0.155493	P02788	Lactotransferrin		0.0846809	-0.839106	P02788	Lactotransferrin		0.552308	0.403723	P02788	Lactotransferrin	+	0	-2.34738	P02788	Lactotransferrin	+	0	-1.74078	P02788	Lactotransferrin		0.416465	0.0864868
P02768	Albumin	+	0.0174884	-1.1793	P02768	Albumin	+	0	-1.68994	P02768	Albumin		0.0736296	-2.72836	P02768	Albumin	+	0	-1.35505	P02768	Albumin	+	0.0171613	-1.40867	P02768	Albumin	+	0.0257931	-0.788944	P02768	Albumin	+	0.004	-0.65724	P02768	Albumin	+	0.02275	-0.695465	P02768	Albumin		0.122851	-0.20628	P02768	Albumin	+	0.00195918	-0.960463
P05164	Myeloperoxidase	+	0	2.73917	P05164	Myeloperoxidase	+	0	-2.09961	P05164	Myeloperoxidase		0.525197	0.0509853	P05164	Myeloperoxidase		0.887743	0.254442	P05164	Myeloperoxidase		0.434281	0.247803	P05164	Myeloperoxidase		0.147212	1.07827	P05164	Myeloperoxidase	+	0	2.05368	P05164	Myeloperoxidase		0.083561	-0.350733	P05164	Myeloperoxidase		0.0618182	0.98299	P05164	Myeloperoxidase	+	0	2.74696
P19013	Keratin, type II cytoskeletal 4	+	0.00715152	-4.33026	P19013	Keratin, type II cytoskeletal 4	+	0.0162553	-3.86469	P19013	Keratin, type II cytoskeletal 4	+	0.01075	-2.5905	P19013	Keratin, type II cytoskeletal 4	+	0.0238	-1.93566	P19013	Keratin, type II cytoskeletal 4	+	0.0143636	-3.53801	P19013	Keratin, type II cytoskeletal 4		0.0767826	-1.74894	P19013	Keratin, type II cytoskeletal 4	+	0.00604255	-3.00278	P19013	Keratin, type II cytoskeletal 4		0.732697	1.34517	P19013	Keratin, type II cytoskeletal 4	+	0	-3.02197	P19013	Keratin, type II cytoskeletal 4	+	0	-4.78376
Q9HC84	Mucin-5B	+	0.0389333	-3.00867	Q9HC84	Mucin-5B	+	0.0153158	-2.28746	Q9HC84	Mucin-5B		0.900343	0.0224886	Q9HC84	Mucin-5B		0.158393	-0.433734	Q9HC84	Mucin-5B		0.587645	0.310376	Q9HC84	Mucin-5B		0.6965	0.768029	Q9HC84	Mucin-5B		0.08375	-1.51769	Q9HC84	Mucin-5B		0.200612	-0.655204	Q9HC84	Mucin-5B		0.112	-2.04757	Q9HC84	Mucin-5B	+	0.00449315	-3.36193
P01024	Complement C3	+	0.0170909	-1.35158	P01024	Complement C3	+	0	-2.2207	P01024	Complement C3	+	0.0307895	-1.34207	P01024	Complement C3		0.0579294	-0.679813	P01024	Complement C3	+	0.0179429	-1.40551	P01024	Complement C3	+	0.0461622	-1.16069	P01024	Complement C3	+	0.00568	-1.39069	P01024	Complement C3	+	0.0324923	-1.97629	P01024	Complement C3	+	0.0491034	-1.38713	P01024	Complement C3	+	0	-1.96082
P02808	Statherin	+	0	-3.12625	P02808	Statherin	+	0	-1.89884	P02808	Statherin	+	0.01175	-3.66341	P02808	Statherin	+	0.004	-1.8141	P02808	Statherin		0.602528	-1.07626	P02808	Statherin		0.259102	-0.228107	P02808	Statherin	+	0.0186462	-1.27338	P02808	Statherin	+	0	-2.26721	P02808	Statherin		0.111802	-0.540126	P02808	Statherin	+	0.02305	-2.61892
P02787	Serotransferrin	+	0.01504	-1.85026	P02787	Serotransferrin		0.226131	-0.495725	P02787	Serotransferrin		0.237709	-2.0327	P02787	Serotransferrin		0.189394	-1.34398	P02787	Serotransferrin		0.0526154	-1.73473	P02787	Serotransferrin		0.875489	-0.0404339	P02787	Serotransferrin		0.271009	-0.737305	P02787	Serotransferrin	+	0	-1.42061	P02787	Serotransferrin		0.711475	-0.137653	P02787	Serotransferrin	+	0.00323529	-1.87377
P15924	Desmoplakin		0.228407	-0.514451	P15924	Desmoplakin		0.846014	0.344697	P15924	Desmoplakin	+	0.0421026	-1.83966	P15924	Desmoplakin		0.135654	-1.82198	P15924	Desmoplakin		0.357088	-1.04163	P15924	Desmoplakin		0.742831	1.1903	P15924	Desmoplakin		0.2763	-0.467669	P15924	Desmoplakin		0.32191	0.646237	P15924	Desmoplakin		0.8445	1.96647	P15924	Desmoplakin	+	0.00354839	-1.87135
P0DUB6	Alpha-amylase 1A	+	0.0155789	-2.7716	P0DUB6	Alpha-amylase 1A	+	0.00275556	-1.97208	P0DUB6	Alpha-amylase 1A	+	0.00733333	-2.20512	P0DUB6	Alpha-amylase 1A		0.0556667	-1.84424	P0DUB6	Alpha-amylase 1A		0.0518182	-2.29091	P0DUB6	Alpha-amylase 1A		0.240884	-1.33996	P0DUB6	Alpha-amylase 1A	+	0.0071	-1.89184	P0DUB6	Alpha-amylase 1A	+	0	-0.824133	P0DUB6	Alpha-amylase 1A		0.0800615	-1.24556	P0DUB6	Alpha-amylase 1A	+	0.002	-1.62284
P68871	Hemoglobin subunit beta	+	0.00372414	-2.2832	P68871	Hemoglobin subunit beta		0.844435	2.07623	P68871	Hemoglobin subunit beta	+	0.00775	-1.18893	P68871	Hemoglobin subunit beta	+	0.003	-1.32521	P68871	Hemoglobin subunit beta	+	0	2.34838	P68871	Hemoglobin subunit beta		0.163189	1.49759	P68871	Hemoglobin subunit beta	+	0.00631111	2.89403	P68871	Hemoglobin subunit beta		0.498667	3.54158	P68871	Hemoglobin subunit beta		0.913927	-0.975622	P68871	Hemoglobin subunit beta		0.785606	2.68355
P13646	Keratin, type I cytoskeletal 13	+	0	-3.82547	P13646	Keratin, type I cytoskeletal 13	+	0	-3.79121	P13646	Keratin, type I cytoskeletal 13	+	0.0104762	-3.46577	P13646	Keratin, type I cytoskeletal 13	+	0	-2.54537	P13646	Keratin, type I cytoskeletal 13	+	0	-2.94927	P13646	Keratin, type I cytoskeletal 13		0.245304	-3.09882	P13646	Keratin, type I cytoskeletal 13	+	0	-3.54197	P13646	Keratin, type I cytoskeletal 13	+	0.028127	1.33923	P13646	Keratin, type I cytoskeletal 13	+	0	-3.35962	P13646	Keratin, type I cytoskeletal 13	+	0	-3.56835
P61626	Lysozyme C	+	0.0422857	0.443306	P61626	Lysozyme C	+	0	4.83385	P61626	Lysozyme C	+	0.0122222	-1.49238	P61626	Lysozyme C		0.157698	-0.450636	P61626	Lysozyme C	+	0	2.34028	P61626	Lysozyme C	+	0	1.64779	P61626	Lysozyme C	+	0	2.25454	P61626	Lysozyme C		0.629366	-0.0929356	P61626	Lysozyme C		0.143319	0.883265	P61626	Lysozyme C		0.689529	0.360638
P01023	Alpha-2-macroglobulin	+	0.0379326	-1.23012	P01023	Alpha-2-macroglobulin	+	0.0026383	-2.63771	P01023	Alpha-2-macroglobulin		0.171644	-1.19797	P01023	Alpha-2-macroglobulin		0.0506173	-1.48596	P01023	Alpha-2-macroglobulin		0.09345	-1.55403	P01023	Alpha-2-macroglobulin		0.277426	-0.906184	P01023	Alpha-2-macroglobulin		0.131886	-0.93207	P01023	Alpha-2-macroglobulin		0.07515	-2.00157	P01023	Alpha-2-macroglobulin		0.259741	-0.681713	P01023	Alpha-2-macroglobulin	+	0.00318841	-2.42124
P69905	Hemoglobin subunit alpha	+	0.00348387	-2.54613	P69905	Hemoglobin subunit alpha	+	0	-3.46573	P69905	Hemoglobin subunit alpha	+	0.0104444	-3.83979	P69905	Hemoglobin subunit alpha	+	0.0143396	-3.09059	P69905	Hemoglobin subunit alpha	+	0.0357818	-1.56587	P69905	Hemoglobin subunit alpha	+	0.0218667	-2.57578	P69905	Hemoglobin subunit alpha	+	0.0246377	-1.59946	P69905	Hemoglobin subunit alpha	+	0.0253953	-2.30042	P69905	Hemoglobin subunit alpha		0.142667	0.472673	P69905	Hemoglobin subunit alpha	+	0.004	-2.18745
P08311	Cathepsin G		0.909652	-0.632786	P08311	Cathepsin G	+	0.0160842	-1.58915	P08311	Cathepsin G		0.550738	-1.65643	P08311	Cathepsin G		0.370299	-0.52392	P08311	Cathepsin G		0.233584	-0.399635	P08311	Cathepsin G		0.136381	0.446756	P08311	Cathepsin G	+	0.00788889	1.02255	P08311	Cathepsin G		0.873051	-0.638893	P08311	Cathepsin G		0.139429	2.51736	P08311	Cathepsin G	+	0.0224878	2.08531
P0DOX5	Immunoglobulin gamma-1 heavy chain		0.0517021	-1.53153	P0DOX5	Immunoglobulin gamma-1 heavy chain	+	0	-4.0218	P0DOX5	Immunoglobulin gamma-1 heavy chain	+	0.031	-1.92552	P0DOX5	Immunoglobulin gamma-1 heavy chain	+	0	-2.05721	P0DOX5	Immunoglobulin gamma-1 heavy chain	+	0	-2.43495	P0DOX5	Immunoglobulin gamma-1 heavy chain		0.0675349	-3.78914	P0DOX5	Immunoglobulin gamma-1 heavy chain	+	0	-3.44858	P0DOX5	Immunoglobulin gamma-1 heavy chain	+	0.00418182	-4.06645	P0DOX5	Immunoglobulin gamma-1 heavy chain	+	0.00685714	-2.85822	P0DOX5	Immunoglobulin gamma-1 heavy chain	+	0	-2.61958
P01876	Immunoglobulin heavy constant alpha 1		0.775294	-0.232605	P01876	Immunoglobulin heavy constant alpha 1		0.083963	-2.23111	P01876	Immunoglobulin heavy constant alpha 1		0.213533	-1.06645	P01876	Immunoglobulin heavy constant alpha 1		0.0592644	-0.774585	P01876	Immunoglobulin heavy constant alpha 1		0.0650141	-2.46941	P01876	Immunoglobulin heavy constant alpha 1		0.385369	-0.123567	P01876	Immunoglobulin heavy constant alpha 1		0.0760435	-0.740504	P01876	Immunoglobulin heavy constant alpha 1	+	0.0250968	-0.883708	P01876	Immunoglobulin heavy constant alpha 1		0.208392	-0.222449	P01876	Immunoglobulin heavy constant alpha 1	+	0.00177778	-1.28177
P01833	Polymeric immunoglobulin receptor	+	0.0452473	-4.95261	P01833	Polymeric immunoglobulin receptor	+	0	-4.1692	P01833	Polymeric immunoglobulin receptor		0.244793	-1.92945	P01833	Polymeric immunoglobulin receptor	+	0.0123636	-3.37695	P01833	Polymeric immunoglobulin receptor		0.303273	-0.852869	P01833	Polymeric immunoglobulin receptor	+	0.0452571	-2.93177	P01833	Polymeric immunoglobulin receptor	+	0.00715789	-3.09643	P01833	Polymeric immunoglobulin receptor	+	0.0242667	-2.89393	P01833	Polymeric immunoglobulin receptor		0.0689492	-3.4392	P01833	Polymeric immunoglobulin receptor	+	0.0350108	-1.99842
P20160	Azurocidin	+	0.0147568	1.28528	P20160	Azurocidin		0.113261	-0.772221	P20160	Azurocidin		0.2136	0.533094	P20160	Azurocidin	+	0.0409189	0.965887	P20160	Azurocidin		0.31375	-0.475845	P20160	Azurocidin		0.198098	0.84255	P20160	Azurocidin	+	0.0432208	1.04545	P20160	Azurocidin		0.525882	-0.511927	P20160	Azurocidin	+	0.0468	1.30494	P20160	Azurocidin	+	0.00328358	1.46948
P01037	Cystatin-SN		0.0954455	-1.61938	P01037	Cystatin-SN	+	0.00698507	-1.88828	P01037	Cystatin-SN	+	0.0271429	-1.26364	P01037	Cystatin-SN	+	0.0155102	-1.60083	P01037	Cystatin-SN		0.700615	0.853597	P01037	Cystatin-SN		0.0926531	-0.851096	P01037	Cystatin-SN		0.615308	-0.721395	P01037	Cystatin-SN	+	0.0259333	-1.42332	P01037	Cystatin-SN		0.247048	-1.43643	P01037	Cystatin-SN	+	0.0234091	-1.82348
P08779	Keratin, type I cytoskeletal 16		0.429292	-2.35006	P08779	Keratin, type I cytoskeletal 16		0.0814206	-0.797395	P08779	Keratin, type I cytoskeletal 16		0.47571	-2.70372	P08779	Keratin, type I cytoskeletal 16		0.0809565	-1.45508	P08779	Keratin, type I cytoskeletal 16		0.748763	-0.00658131	P08779	Keratin, type I cytoskeletal 16	+	0	2.40493	P08779	Keratin, type I cytoskeletal 16		0.621881	-0.893204	P08779	Keratin, type I cytoskeletal 16		0.827378	-1.22812	P08779	Keratin, type I cytoskeletal 16		0.123163	-0.655841	P08779	Keratin, type I cytoskeletal 16	+	0.00461972	-1.86496
P0C0L4	Complement C4-A	+	0.016	-3.05931	P0C0L4	Complement C4-A	+	0.0159167	-2.90268	P0C0L4	Complement C4-A	+	0.0385455	-2.19062	P0C0L4	Complement C4-A		0.0506988	-1.38752	P0C0L4	Complement C4-A		0.167371	-0.425824	P0C0L4	Complement C4-A	+	0.0234286	-2.31541	P0C0L4	Complement C4-A		0.104162	-3.04421	P0C0L4	Complement C4-A		0.0658421	-1.10111	P0C0L4	Complement C4-A		0.110439	-2.21276	P0C0L4	Complement C4-A	+	0.0151169	-2.72549
P06702	Protein S100-A9		0.949163	-0.163576	P06702	Protein S100-A9	+	0.00221429	-2.11845	P06702	Protein S100-A9		0.777913	-0.0715771	P06702	Protein S100-A9		0.27718	0.138311	P06702	Protein S100-A9		0.268152	-0.888313	P06702	Protein S100-A9		0.869215	0.880104	P06702	Protein S100-A9		0.358784	-0.204189	P06702	Protein S100-A9		0.7292	-1.07885	P06702	Protein S100-A9		0.166639	1.65219	P06702	Protein S100-A9		0.423662	-0.0758133
P04264	Keratin, type II cytoskeletal 1		0.652179	-0.193851	P04264	Keratin, type II cytoskeletal 1		0.589353	-0.240323	P04264	Keratin, type II cytoskeletal 1		0.0906667	-0.974607	P04264	Keratin, type II cytoskeletal 1	+	0	4.22186	P04264	Keratin, type II cytoskeletal 1	+	0.0131667	2.07221	P04264	Keratin, type II cytoskeletal 1		0.323701	2.50002	P04264	Keratin, type II cytoskeletal 1		0.115922	0.628237	P04264	Keratin, type II cytoskeletal 1		0.35425	-0.379786	P04264	Keratin, type II cytoskeletal 1		0.2704	-1.11273	P04264	Keratin, type II cytoskeletal 1		0.449649	-0.127849
P02814	Submaxillary gland androgen-regulated protein 3B		0.112981	-1.83721	P02814	Submaxillary gland androgen-regulated protein 3B		0.0770566	-1.6697	P02814	Submaxillary gland androgen-regulated protein 3B		0.111956	-1.43159	P02814	Submaxillary gland androgen-regulated protein 3B		0.117451	-1.5119	P02814	Submaxillary gland androgen-regulated protein 3B		0.270731	-1.14659	P02814	Submaxillary gland androgen-regulated protein 3B		0.322642	-0.471438	P02814	Submaxillary gland androgen-regulated protein 3B		0.110455	-1.31428	P02814	Submaxillary gland androgen-regulated protein 3B		0.0694026	-3.23985	P02814	Submaxillary gland androgen-regulated protein 3B		0.109091	-1.85137	P02814	Submaxillary gland androgen-regulated protein 3B	+	0.0396632	-2.31392
P04083	Annexin A1	+	0	-2.56654	P04083	Annexin A1	+	0.0022963	-2.43539	P04083	Annexin A1	+	0.0107317	-2.46744	P04083	Annexin A1		0.213123	-0.723573	P04083	Annexin A1		0.0529552	-1.15747	P04083	Annexin A1		0.81403	0.440315	P04083	Annexin A1		0.0717333	-1.21232	P04083	Annexin A1	+	0.021	-3.10654	P04083	Annexin A1		0.667769	-2.01153	P04083	Annexin A1	+	0.00188235	-2.42773
P05109	Protein S100-A8		0.120691	5.81119	P05109	Protein S100-A8		0.910894	0.492987	P05109	Protein S100-A8		0.209192	6.53076	P05109	Protein S100-A8	+	0	5.19748	P05109	Protein S100-A8	+	0	4.16175	P05109	Protein S100-A8		0.11434	4.45455	P05109	Protein S100-A8	+	0	4.10755	P05109	Protein S100-A8		0.16271	4.40394	P05109	Protein S100-A8		0.728387	-1.01187	P05109	Protein S100-A8		0.240132	5.17335
P13647	Keratin, type II cytoskeletal 5	+	0	-2.52031	P13647	Keratin, type II cytoskeletal 5	+	0.0364706	-0.949255	P13647	Keratin, type II cytoskeletal 5	+	0.0252063	-3.08298	P13647	Keratin, type II cytoskeletal 5		0.665481	0.354717	P13647	Keratin, type II cytoskeletal 5		0.313441	0.239254	P13647	Keratin, type II cytoskeletal 5		0.881869	0.517146	P13647	Keratin, type II cytoskeletal 5	+	0	-1.89274	P13647	Keratin, type II cytoskeletal 5		0.213703	5.08311	P13647	Keratin, type II cytoskeletal 5		0.278143	-2.34061	P13647	Keratin, type II cytoskeletal 5		0.0630943	-1.28574
Q6MZM9	Proline-rich protein 27	+	0.0141887	-3.36315	Q6MZM9	Proline-rich protein 27	+	0	-5.0952	Q6MZM9	Proline-rich protein 27	+	0.00953846	-4.34759	Q6MZM9	Proline-rich protein 27	+	0	-2.50002	Q6MZM9	Proline-rich protein 27	+	0.00688889	-3.24406	Q6MZM9	Proline-rich protein 27	+	0.027375	-1.95236	Q6MZM9	Proline-rich protein 27	+	0.00747368	-2.89122	Q6MZM9	Proline-rich protein 27	+	0	-4.13718	Q6MZM9	Proline-rich protein 27		0.0629091	-2.14467	Q6MZM9	Proline-rich protein 27	+	0	-2.82901
P13645	Keratin, type I cytoskeletal 10	+	0.0149091	-1.95532	P13645	Keratin, type I cytoskeletal 10		0.114291	-1.0163	P13645	Keratin, type I cytoskeletal 10		0.373488	-1.52085	P13645	Keratin, type I cytoskeletal 10	+	0.0286471	1.84588	P13645	Keratin, type I cytoskeletal 10		0.517854	0.250111	P13645	Keratin, type I cytoskeletal 10		0.608773	0.0764475	P13645	Keratin, type I cytoskeletal 10		0.0824842	-0.633036	P13645	Keratin, type I cytoskeletal 10		0.165231	-0.689481	P13645	Keratin, type I cytoskeletal 10		0.139261	-1.52908	P13645	Keratin, type I cytoskeletal 10		0.0536	-1.50802
P08246	Neutrophil elastase	+	0	-2.0566	P08246	Neutrophil elastase	+	0	-2.8963	P08246	Neutrophil elastase	+	0.0236129	-2.40401	P08246	Neutrophil elastase	+	0.0208276	-2.8543	P08246	Neutrophil elastase	+	0.0151111	-1.90073	P08246	Neutrophil elastase	+	0.0189565	-1.97748	P08246	Neutrophil elastase		0.243096	0.259594	P08246	Neutrophil elastase		0.0938824	-1.12375	P08246	Neutrophil elastase	+	0.0464444	-2.34205	P08246	Neutrophil elastase	+	0	-1.29478
P02675	Fibrinogen beta chain	+	0.015871	-1.6856	P02675	Fibrinogen beta chain		0.885314	0.528082	P02675	Fibrinogen beta chain		0.0678481	-3.03596	P02675	Fibrinogen beta chain	+	0	-2.2012	P02675	Fibrinogen beta chain		0.199158	-0.148335	P02675	Fibrinogen beta chain		0.312692	-2.00223	P02675	Fibrinogen beta chain		0.337516	-0.197073	P02675	Fibrinogen beta chain		0.164638	-0.981493	P02675	Fibrinogen beta chain	+	0.0474667	2.4529	P02675	Fibrinogen beta chain	+	0.0439167	-0.974377
P35579	Myosin-9	+	0.0443913	-0.975952	P35579	Myosin-9	+	0	-2.56872	P35579	Myosin-9		0.0921882	-0.876841	P35579	Myosin-9	+	0.0471899	-0.470049	P35579	Myosin-9	+	0.03064	-0.962803	P35579	Myosin-9		0.546211	0.231614	P35579	Myosin-9	+	0.0325143	-1.04765	P35579	Myosin-9		0.368632	-0.400187	P35579	Myosin-9		0.361517	-0.515715	P35579	Myosin-9	+	0.00204255	-0.794865
P01009	Alpha-1-antitrypsin	+	0.0144615	-4.33665	P01009	Alpha-1-antitrypsin	+	0.0164301	-2.2863	P01009	Alpha-1-antitrypsin		0.127191	-1.82056	P01009	Alpha-1-antitrypsin	+	0.014902	-2.83611	P01009	Alpha-1-antitrypsin		0.0573333	-2.36732	P01009	Alpha-1-antitrypsin		0.199048	-1.70706	P01009	Alpha-1-antitrypsin	+	0.0100645	-2.68586	P01009	Alpha-1-antitrypsin	+	0.0222857	-2.7762	P01009	Alpha-1-antitrypsin	+	0.0547692	-3.13369	P01009	Alpha-1-antitrypsin	+	0.00184615	-3.60181
P35908	Keratin, type II cytoskeletal 2 epidermal	+	0	-2.52788	P35908	Keratin, type II cytoskeletal 2 epidermal	+	0	-2.41939	P35908	Keratin, type II cytoskeletal 2 epidermal	+	0.00563636	-2.74027	P35908	Keratin, type II cytoskeletal 2 epidermal	+	0	-2.35495	P35908	Keratin, type II cytoskeletal 2 epidermal	+	0.0313077	-2.23213	P35908	Keratin, type II cytoskeletal 2 epidermal	+	0.0209231	-1.28667	P35908	Keratin, type II cytoskeletal 2 epidermal	+	0.00671429	-2.06026	P35908	Keratin, type II cytoskeletal 2 epidermal		0.0517808	-2.03661	P35908	Keratin, type II cytoskeletal 2 epidermal	+	0	-1.71404	P35908	Keratin, type II cytoskeletal 2 epidermal	+	0	-2.81162
P30740	Leukocyte elastase inhibitor	+	0.0147451	-1.69065	P30740	Leukocyte elastase inhibitor	+	0	-2.73427	P30740	Leukocyte elastase inhibitor	+	0.0240606	-1.64922	P30740	Leukocyte elastase inhibitor	+	0.0133333	-1.26945	P30740	Leukocyte elastase inhibitor	+	0	-2.52637	P30740	Leukocyte elastase inhibitor		0.114644	-0.662749	P30740	Leukocyte elastase inhibitor	+	0.00728205	-1.60072	P30740	Leukocyte elastase inhibitor		0.215882	-0.547421	P30740	Leukocyte elastase inhibitor		0.0640741	-1.25062	P30740	Leukocyte elastase inhibitor	+	0.00443243	-2.95934
P35527	Keratin, type I cytoskeletal 9	+	0.01456	-1.52139	P35527	Keratin, type I cytoskeletal 9	+	0.00281818	-2.33469	P35527	Keratin, type I cytoskeletal 9	+	0.0158689	-1.56497	P35527	Keratin, type I cytoskeletal 9	+	0.0140741	2.32769	P35527	Keratin, type I cytoskeletal 9	+	0.0156923	-0.975266	P35527	Keratin, type I cytoskeletal 9		0.0521026	-0.768215	P35527	Keratin, type I cytoskeletal 9		0.240456	-1.75461	P35527	Keratin, type I cytoskeletal 9	+	0.0237391	-2.62852	P35527	Keratin, type I cytoskeletal 9	+	0	-1.26271	P35527	Keratin, type I cytoskeletal 9	+	0	-2.28044
P02810	Salivary acidic proline-rich phosphoprotein 1/2	+	0.0295529	-2.23812	P02810	Salivary acidic proline-rich phosphoprotein 1/2	+	0.00302439	-1.81517	P02810	Salivary acidic proline-rich phosphoprotein 1/2	+	0.0206667	-2.66515	P02810	Salivary acidic proline-rich phosphoprotein 1/2	+	0.0081	-1.34837	P02810	Salivary acidic proline-rich phosphoprotein 1/2	+	0.00775	3.84168	P02810	Salivary acidic proline-rich phosphoprotein 1/2		0.0728182	1.48099	P02810	Salivary acidic proline-rich phosphoprotein 1/2	+	0.00847458	-1.18202	P02810	Salivary acidic proline-rich phosphoprotein 1/2		0.212952	-0.53803	P02810	Salivary acidic proline-rich phosphoprotein 1/2		0.0730159	-0.936724	P02810	Salivary acidic proline-rich phosphoprotein 1/2	+	0	-2.49795
P07355	Annexin A2	+	0.0146866	-4.69689	P07355	Annexin A2	+	0.0159506	-4.53035	P07355	Annexin A2	+	0.0164068	-5.38106	P07355	Annexin A2		0.093125	-3.57268	P07355	Annexin A2		0.0730526	-4.04174	P07355	Annexin A2		0.117018	-3.74433	P07355	Annexin A2		0.0626824	-3.36802	P07355	Annexin A2	+	0.0476	-3.45022	P07355	Annexin A2		0.262459	-2.02011	P07355	Annexin A2	+	0.0231461	-4.40137
P02647	Apolipoprotein A-I	+	0.0178378	-4.06458	P02647	Apolipoprotein A-I	+	0.00269565	-5.15431	P02647	Apolipoprotein A-I	+	0.00826667	-5.307	P02647	Apolipoprotein A-I	+	0.003375	-3.77224	P02647	Apolipoprotein A-I		0.0610286	-3.01323	P02647	Apolipoprotein A-I		0.0691429	-2.58819	P02647	Apolipoprotein A-I	+	0.005875	-4.37929	P02647	Apolipoprotein A-I	+	0.00666667	-4.32611	P02647	Apolipoprotein A-I	+	0.0527407	-3.39416	P02647	Apolipoprotein A-I	+	0	-5.20517
P00738	Haptoglobin	+	0	-1.13315	P00738	Haptoglobin	+	0.016092	-1.0534	P00738	Haptoglobin		0.98661	-0.688158	P00738	Haptoglobin		0.245681	-0.141909	P00738	Haptoglobin		0.377368	0.44505	P00738	Haptoglobin		0.245287	-0.216011	P00738	Haptoglobin	+	0.00537143	-1.34238	P00738	Haptoglobin		0.727188	-0.0664492	P00738	Haptoglobin		0.0656667	2.52459	P00738	Haptoglobin		0.0578824	-1.24282
P12273	Prolactin-inducible protein		0.130372	-0.99151	P12273	Prolactin-inducible protein		0.105028	-0.77769	P12273	Prolactin-inducible protein		0.703825	-0.154922	P12273	Prolactin-inducible protein		0.156926	-1.37572	P12273	Prolactin-inducible protein		0.231294	-1.9691	P12273	Prolactin-inducible protein		0.169195	-1.24559	P12273	Prolactin-inducible protein		0.137057	-2.14714	P12273	Prolactin-inducible protein		0.777612	0.986429	P12273	Prolactin-inducible protein		0.995461	0.387417	P12273	Prolactin-inducible protein	+	0.0342174	-2.57569
P04406	Glyceraldehyde-3-phosphate dehydrogenase	+	0.0151385	-3.14385	P04406	Glyceraldehyde-3-phosphate dehydrogenase	+	0	-3.9661	P04406	Glyceraldehyde-3-phosphate dehydrogenase		0.102273	-3.0502	P04406	Glyceraldehyde-3-phosphate dehydrogenase	+	0.00385714	-2.13561	P04406	Glyceraldehyde-3-phosphate dehydrogenase	+	0.0345263	-0.721198	P04406	Glyceraldehyde-3-phosphate dehydrogenase	+	0.0428235	-0.995457	P04406	Glyceraldehyde-3-phosphate dehydrogenase	+	0	-3.54503	P04406	Glyceraldehyde-3-phosphate dehydrogenase		0.914493	-0.0157537	P04406	Glyceraldehyde-3-phosphate dehydrogenase	+	0.0390476	-2.50155	P04406	Glyceraldehyde-3-phosphate dehydrogenase		0.0567692	-1.25254
P03973	Antileukoproteinase		0.9398	0.898162	P03973	Antileukoproteinase		0.188959	-1.15821	P03973	Antileukoproteinase	+	0.00590476	-4.43185	P03973	Antileukoproteinase	+	0.00327273	-1.87026	P03973	Antileukoproteinase		0.128675	-1.22002	P03973	Antileukoproteinase		0.241625	-0.403712	P03973	Antileukoproteinase	+	0.00552941	-1.39339	P03973	Antileukoproteinase		0.636288	-1.72307	P03973	Antileukoproteinase		0.757696	-0.954974	P03973	Antileukoproteinase		0.230857	-2.04567
P25311	Zinc-alpha-2-glycoprotein	+	0.0153803	-1.19573	P25311	Zinc-alpha-2-glycoprotein	+	0.00393651	-2.68271	P25311	Zinc-alpha-2-glycoprotein	+	0.0244308	-1.89877	P25311	Zinc-alpha-2-glycoprotein	+	0.00790244	-1.98884	P25311	Zinc-alpha-2-glycoprotein		0.205625	-0.686519	P25311	Zinc-alpha-2-glycoprotein		0.256454	-1.67034	P25311	Zinc-alpha-2-glycoprotein		0.081234	-1.68863	P25311	Zinc-alpha-2-glycoprotein		0.210141	-2.10589	P25311	Zinc-alpha-2-glycoprotein		0.156926	-0.455365	P25311	Zinc-alpha-2-glycoprotein	+	0.0037931	-2.00809
Q96DA0	Pancreatic adenocarcinoma up-regulated factor		0.308423	-0.43531	Q96DA0	Pancreatic adenocarcinoma up-regulated factor	+	0.0315248	-1.01622	Q96DA0	Pancreatic adenocarcinoma up-regulated factor	+	0.0115789	-1.92647	Q96DA0	Pancreatic adenocarcinoma up-regulated factor	+	0.0126512	-2.92141	Q96DA0	Pancreatic adenocarcinoma up-regulated factor		0.190495	-0.705948	Q96DA0	Pancreatic adenocarcinoma up-regulated factor	+	0.0207619	-1.77999	Q96DA0	Pancreatic adenocarcinoma up-regulated factor		0.723857	0.328341	Q96DA0	Pancreatic adenocarcinoma up-regulated factor		0.494414	-0.0664482	Q96DA0	Pancreatic adenocarcinoma up-regulated factor		0.0634783	-1.26645	Q96DA0	Pancreatic adenocarcinoma up-regulated factor	+	0.00468571	-3.19397
P04040	Catalase	+	0	-3.99954	P04040	Catalase	+	0.003875	-3.9729	P04040	Catalase	+	0.0115102	-3.43826	P04040	Catalase	+	0	-3.21171	P04040	Catalase	+	0.0319167	-2.13494	P04040	Catalase		0.348436	-0.521213	P04040	Catalase	+	0.0311781	-3.73965	P04040	Catalase	+	0.0123529	-3.54356	P04040	Catalase	+	0.0431579	-2.61763	P04040	Catalase		0.0888	-1.78977
Q04695	Keratin, type I cytoskeletal 17		0.199043	-0.36586	Q04695	Keratin, type I cytoskeletal 17		0.131179	-3.05737	Q04695	Keratin, type I cytoskeletal 17		0.151143	-2.10531	Q04695	Keratin, type I cytoskeletal 17		0.136971	-0.601263	Q04695	Keratin, type I cytoskeletal 17		0.381831	-0.531705	Q04695	Keratin, type I cytoskeletal 17		0.243727	0.862622	Q04695	Keratin, type I cytoskeletal 17		0.947348	0.193883	Q04695	Keratin, type I cytoskeletal 17		0.643433	0.439118	Q04695	Keratin, type I cytoskeletal 17		0.897545	-0.36323	Q04695	Keratin, type I cytoskeletal 17		0.063514	-2.92274
Q9UGM3	Scavenger receptor cysteine-rich domain-containing protein DMBT1	+	0.0130286	-2.14995	Q9UGM3	Scavenger receptor cysteine-rich domain-containing protein DMBT1	+	0.00427586	-2.87731	Q9UGM3	Scavenger receptor cysteine-rich domain-containing protein DMBT1	+	0.0125714	-2.24943	Q9UGM3	Scavenger receptor cysteine-rich domain-containing protein DMBT1	+	0.0152	-3.03173	Q9UGM3	Scavenger receptor cysteine-rich domain-containing protein DMBT1	+	0.0305217	-2.25421	Q9UGM3	Scavenger receptor cysteine-rich domain-containing protein DMBT1		0.669701	0.215099	Q9UGM3	Scavenger receptor cysteine-rich domain-containing protein DMBT1		0.1084	-1.62791	Q9UGM3	Scavenger receptor cysteine-rich domain-containing protein DMBT1	+	0.0248182	-2.66039	Q9UGM3	Scavenger receptor cysteine-rich domain-containing protein DMBT1		0.0652	-1.2921	Q9UGM3	Scavenger receptor cysteine-rich domain-containing protein DMBT1	+	0	-4.74873
P12724	Eosinophil cationic protein	+	0	2.53156	P12724	Eosinophil cationic protein	+	0	1.91255	P12724	Eosinophil cationic protein	+	0.00652632	1.05466	P12724	Eosinophil cationic protein	+	0	4.53436	P12724	Eosinophil cationic protein	+	0	4.81268	P12724	Eosinophil cationic protein	+	0	3.4293	P12724	Eosinophil cationic protein	+	0	4.09451	P12724	Eosinophil cationic protein	+	0.032	0.251332	P12724	Eosinophil cationic protein	+	0	2.25752	P12724	Eosinophil cationic protein	+	0	3.32652
P17213	Bactericidal permeability-increasing protein	+	0	-5.07427	P17213	Bactericidal permeability-increasing protein	+	0	-4.1746	P17213	Bactericidal permeability-increasing protein	+	0.0137778	-3.80145	P17213	Bactericidal permeability-increasing protein	+	0	-3.86068	P17213	Bactericidal permeability-increasing protein	+	0.011	-2.81606	P17213	Bactericidal permeability-increasing protein		0.174359	-1.3924	P17213	Bactericidal permeability-increasing protein	+	0.00617391	-2.87766	P17213	Bactericidal permeability-increasing protein	+	0.00383333	-4.73745	P17213	Bactericidal permeability-increasing protein		0.0648889	-2.05594	P17213	Bactericidal permeability-increasing protein	+	0.00181132	-2.618
P59665	Neutrophil defensin 1	+	0.0204	-2.55114	P59665	Neutrophil defensin 1		0.336496	-1.97771	P59665	Neutrophil defensin 1		0.1702	-2.67585	P59665	Neutrophil defensin 1		0.05125	-1.28961	P59665	Neutrophil defensin 1		0.605016	-0.415854	P59665	Neutrophil defensin 1		0.125733	-1.52283	P59665	Neutrophil defensin 1		0.126769	-0.967055	P59665	Neutrophil defensin 1	+	0	-3.43839	P59665	Neutrophil defensin 1		0.140978	-1.66866	P59665	Neutrophil defensin 1	+	0.0283956	-1.82657
Q8NFU4	Follicular dendritic cell secreted peptide	+	0.015375	-2.40111	Q8NFU4	Follicular dendritic cell secreted peptide	+	0	-2.61352	Q8NFU4	Follicular dendritic cell secreted peptide		0.0861951	-2.8366	Q8NFU4	Follicular dendritic cell secreted peptide	+	0	-2.22012	Q8NFU4	Follicular dendritic cell secreted peptide	+	0	-2.03398	Q8NFU4	Follicular dendritic cell secreted peptide	+	0.0218	-1.78474	Q8NFU4	Follicular dendritic cell secreted peptide	+	0.00591667	-2.99811	Q8NFU4	Follicular dendritic cell secreted peptide	+	0.0268148	-1.9436	Q8NFU4	Follicular dendritic cell secreted peptide	+	0	-1.93288	Q8NFU4	Follicular dendritic cell secreted peptide	+	0	-2.60077
P14618	Pyruvate kinase PKM	+	0.0161311	-3.79911	P14618	Pyruvate kinase PKM		0.313312	-1.94439	P14618	Pyruvate kinase PKM	+	0.0106415	-5.03868	P14618	Pyruvate kinase PKM	+	0.0381972	-2.22209	P14618	Pyruvate kinase PKM		0.066973	-1.95602	P14618	Pyruvate kinase PKM		0.246978	-1.55817	P14618	Pyruvate kinase PKM		0.0644651	-2.38056	P14618	Pyruvate kinase PKM	+	0.0104516	-3.73468	P14618	Pyruvate kinase PKM		0.109067	-2.04093	P14618	Pyruvate kinase PKM	+	0.00372881	-3.70762
P02679	Fibrinogen gamma chain	+	0.0352184	-1.66884	P02679	Fibrinogen gamma chain		0.835	0.816335	P02679	Fibrinogen gamma chain		0.25175	-1.25787	P02679	Fibrinogen gamma chain		0.0857684	-0.542022	P02679	Fibrinogen gamma chain		0.0721039	-2.03072	P02679	Fibrinogen gamma chain		0.0733333	-1.80336	P02679	Fibrinogen gamma chain		0.600879	0.155293	P02679	Fibrinogen gamma chain		0.309891	-0.00518322	P02679	Fibrinogen gamma chain		0.132809	2.28568	P02679	Fibrinogen gamma chain		0.0584554	-2.52697
P22079	Lactoperoxidase	+	0.0226341	-3.80995	P22079	Lactoperoxidase	+	0.00253061	-3.66846	P22079	Lactoperoxidase	+	0.026973	-2.56887	P22079	Lactoperoxidase	+	0.00308571	-2.53748	P22079	Lactoperoxidase		0.196638	-0.768799	P22079	Lactoperoxidase	+	0.0181667	-2.31113	P22079	Lactoperoxidase	+	0.00862069	-2.07972	P22079	Lactoperoxidase	+	0.0272982	-4.85502	P22079	Lactoperoxidase	+	0.0593333	-2.33278	P22079	Lactoperoxidase	+	0.00338462	-3.02508
P01859	Immunoglobulin heavy constant gamma 2		0.443542	3.14173	P01859	Immunoglobulin heavy constant gamma 2	+	0.0110811	-1.86017	P01859	Immunoglobulin heavy constant gamma 2	+	0.0142545	-2.04016	P01859	Immunoglobulin heavy constant gamma 2		0.332952	-0.0136261	P01859	Immunoglobulin heavy constant gamma 2	+	0.0456393	-1.72349	P01859	Immunoglobulin heavy constant gamma 2		0.242426	-0.724411	P01859	Immunoglobulin heavy constant gamma 2	+	0.0335135	-1.40701	P01859	Immunoglobulin heavy constant gamma 2	+	0.02184	-2.60458	P01859	Immunoglobulin heavy constant gamma 2	+	0.0499355	-2.08368	P01859	Immunoglobulin heavy constant gamma 2		0.579822	0.363132
Q96DR5	BPI fold-containing family A member 2		0.395843	-0.88862	Q96DR5	BPI fold-containing family A member 2		0.118832	-1.03253	Q96DR5	BPI fold-containing family A member 2		0.621865	-1.30527	Q96DR5	BPI fold-containing family A member 2		0.419781	-0.070262	Q96DR5	BPI fold-containing family A member 2		0.988371	-0.64551	Q96DR5	BPI fold-containing family A member 2		0.163421	0.971745	Q96DR5	BPI fold-containing family A member 2		0.67487	-0.189785	Q96DR5	BPI fold-containing family A member 2		0.631238	0.110063	Q96DR5	BPI fold-containing family A member 2		0.344139	-1.945	Q96DR5	BPI fold-containing family A member 2		0.786522	-0.157283
P01036	Cystatin-S	+	0	-4.14617	P01036	Cystatin-S	+	0.00258333	-4.28095	P01036	Cystatin-S	+	0.0124	-4.0374	P01036	Cystatin-S	+	0.00372414	-2.67443	P01036	Cystatin-S	+	0.0217778	-2.20662	P01036	Cystatin-S		0.0956923	-3.04151	P01036	Cystatin-S	+	0.00606452	-3.71119	P01036	Cystatin-S	+	0.00340741	-3.16056	P01036	Cystatin-S		0.0678	-1.9223	P01036	Cystatin-S	+	0	-3.97268
P11678	Eosinophil peroxidase		0.273917	-0.927183	P11678	Eosinophil peroxidase	+	0.015381	-1.48913	P11678	Eosinophil peroxidase		0.175608	-2.10405	P11678	Eosinophil peroxidase		0.110376	-0.966312	P11678	Eosinophil peroxidase		0.205814	-0.644712	P11678	Eosinophil peroxidase		0.148313	-1.74979	P11678	Eosinophil peroxidase	+	0.0490732	-1.57388	P11678	Eosinophil peroxidase	+	0.0213659	-1.41764	P11678	Eosinophil peroxidase		0.0807273	-1.06486	P11678	Eosinophil peroxidase	+	0.0377447	-0.883837
P14923	Junction plakoglobin		0.398127	-0.0967512	P14923	Junction plakoglobin		0.143866	-1.56947	P14923	Junction plakoglobin		0.257404	-1.76265	P14923	Junction plakoglobin		0.327645	-1.38008	P14923	Junction plakoglobin		0.375409	-0.947584	P14923	Junction plakoglobin		0.158423	-2.24292	P14923	Junction plakoglobin		0.282777	-0.28165	P14923	Junction plakoglobin		0.165053	-4.01102	P14923	Junction plakoglobin		0.799654	1.26482	P14923	Junction plakoglobin		0.459152	0.942657
P80511	Protein S100-A12	+	0	-2.51915	P80511	Protein S100-A12	+	0	-2.95159	P80511	Protein S100-A12	+	0.00516667	-3.33578	P80511	Protein S100-A12	+	0.00771429	-2.78746	P80511	Protein S100-A12	+	0.0386441	-1.6452	P80511	Protein S100-A12	+	0.0201481	-1.42907	P80511	Protein S100-A12	+	0.00741818	-1.75803	P80511	Protein S100-A12	+	0.0343881	-1.52198	P80511	Protein S100-A12	+	0.0476757	-2.6116	P80511	Protein S100-A12	+	0	-2.8072
P08670	Vimentin	+	0	-3.33047	P08670	Vimentin	+	0.0118841	-4.06958	P08670	Vimentin	+	0.00814815	-2.60575	P08670	Vimentin	+	0.0454026	-1.40858	P08670	Vimentin	+	0.0351429	-1.53092	P08670	Vimentin	+	0.0292	-1.60227	P08670	Vimentin	+	0.00692683	-3.1733	P08670	Vimentin	+	0.0113514	-2.12538	P08670	Vimentin		0.0626923	-2.53131	P08670	Vimentin	+	0.00385965	-3.91612
P08727	Keratin, type I cytoskeletal 19		0.063134	-1.57206	P08727	Keratin, type I cytoskeletal 19	+	0.0157561	-2.603	P08727	Keratin, type I cytoskeletal 19		0.693735	-0.11592	P08727	Keratin, type I cytoskeletal 19		0.141524	-1.07855	P08727	Keratin, type I cytoskeletal 19		0.613102	-0.563914	P08727	Keratin, type I cytoskeletal 19		0.880638	-0.152706	P08727	Keratin, type I cytoskeletal 19	+	0.00535849	-1.92755	P08727	Keratin, type I cytoskeletal 19		0.124889	1.04594	P08727	Keratin, type I cytoskeletal 19		0.6551	0.0161209	P08727	Keratin, type I cytoskeletal 19	+	0.0149231	-1.52893
P06733	Alpha-enolase	+	0.0167111	-2.39969	P06733	Alpha-enolase	+	0.00225455	-3.34687	P06733	Alpha-enolase	+	0.0248125	-2.22088	P06733	Alpha-enolase		0.246847	-0.301856	P06733	Alpha-enolase		0.0823291	-1.14928	P06733	Alpha-enolase		0.299223	-0.495796	P06733	Alpha-enolase	+	0.0104	-2.48206	P06733	Alpha-enolase		0.640419	0.846669	P06733	Alpha-enolase		0.0781875	-1.56185	P06733	Alpha-enolase	+	0.0248193	-1.82918
P08603	Complement factor H	+	0	-3.43492	P08603	Complement factor H	+	0.0149231	-3.23765	P08603	Complement factor H	+	0.0053913	-4.0004	P08603	Complement factor H	+	0	-3.27357	P08603	Complement factor H	+	0	-3.72579	P08603	Complement factor H	+	0.0298182	-3.38866	P08603	Complement factor H	+	0	-4.25963	P08603	Complement factor H		0.103767	-3.12686	P08603	Complement factor H	+	0.0455556	-2.95899	P08603	Complement factor H	+	0.00223256	-2.84194
P0DOY2	Immunoglobulin lambda constant 2		0.0511579	-2.20013	P0DOY2	Immunoglobulin lambda constant 2	+	0.0159091	-2.17164	P0DOY2	Immunoglobulin lambda constant 2	+	0.0263889	-2.1128	P0DOY2	Immunoglobulin lambda constant 2	+	0.0290746	-1.9881	P0DOY2	Immunoglobulin lambda constant 2		0.237212	-0.496475	P0DOY2	Immunoglobulin lambda constant 2		0.244282	-0.565219	P0DOY2	Immunoglobulin lambda constant 2	+	0.0493671	-1.56729	P0DOY2	Immunoglobulin lambda constant 2	+	0.033	-2.81092	P0DOY2	Immunoglobulin lambda constant 2		0.17324	-0.608566	P0DOY2	Immunoglobulin lambda constant 2	+	0.0242353	-2.51351
P0DOX2	Immunoglobulin alpha-2 heavy chain		0.590226	-1.91362	P0DOX2	Immunoglobulin alpha-2 heavy chain		0.433832	-0.837175	P0DOX2	Immunoglobulin alpha-2 heavy chain		0.571695	-1.29296	P0DOX2	Immunoglobulin alpha-2 heavy chain		0.576636	-0.369069	P0DOX2	Immunoglobulin alpha-2 heavy chain		0.295303	2.02516	P0DOX2	Immunoglobulin alpha-2 heavy chain		0.146388	2.33722	P0DOX2	Immunoglobulin alpha-2 heavy chain		0.285213	-2.35217	P0DOX2	Immunoglobulin alpha-2 heavy chain		0.615541	-1.98578	P0DOX2	Immunoglobulin alpha-2 heavy chain		0.300071	-2.69304	P0DOX2	Immunoglobulin alpha-2 heavy chain	+	0.00392857	-2.69943
P00747	Plasminogen	+	0.007375	-2.53329	P00747	Plasminogen	+	0.0252121	-1.57398	P00747	Plasminogen	+	0.0112821	-2.33851	P00747	Plasminogen		0.712735	0.101893	P00747	Plasminogen		0.986099	-0.257728	P00747	Plasminogen		0.3	-1.19248	P00747	Plasminogen	+	0.00626667	-2.3398	P00747	Plasminogen		0.0548649	-2.66487	P00747	Plasminogen		0.168202	-1.24276	P00747	Plasminogen	+	0.00333333	-1.84581
Q9UBG3	Cornulin	+	0.0173684	-3.02221	Q9UBG3	Cornulin	+	0	-3.19022	Q9UBG3	Cornulin	+	0	-4.48569	Q9UBG3	Cornulin	+	0.00291892	-3.40677	Q9UBG3	Cornulin	+	0	-3.8364	Q9UBG3	Cornulin	+	0.0294545	-3.72205	Q9UBG3	Cornulin	+	0.00696296	-3.8528	Q9UBG3	Cornulin		0.0636267	-3.34594	Q9UBG3	Cornulin		0.0696129	-1.85034	Q9UBG3	Cornulin	+	0.00437333	-3.92255
P24158	Myeloblastin		0.0935922	0.581308	P24158	Myeloblastin	+	0.00572308	-1.69664	P24158	Myeloblastin		0.546791	-1.33904	P24158	Myeloblastin	+	0.0387429	-0.700601	P24158	Myeloblastin		0.978676	-0.0712471	P24158	Myeloblastin		0.641806	-0.146765	P24158	Myeloblastin	+	0.00767568	1.08305	P24158	Myeloblastin	+	0.0214118	-1.77009	P24158	Myeloblastin		0.852496	0.86038	P24158	Myeloblastin		0.140313	-0.405407
P54108	Cysteine-rich secretory protein 3		0.050625	-2.73571	P54108	Cysteine-rich secretory protein 3	+	0.00406557	-1.55508	P54108	Cysteine-rich secretory protein 3	+	0.00885714	-4.22956	P54108	Cysteine-rich secretory protein 3		0.0825806	-2.36535	P54108	Cysteine-rich secretory protein 3		0.883373	0.654814	P54108	Cysteine-rich secretory protein 3		0.620787	-1.83692	P54108	Cysteine-rich secretory protein 3		0.0535422	-2.32586	P54108	Cysteine-rich secretory protein 3	+	0.0238095	-3.28054	P54108	Cysteine-rich secretory protein 3		0.056093	-1.6766	P54108	Cysteine-rich secretory protein 3	+	0	-3.89196
P80188	Neutrophil gelatinase-associated lipocalin		0.237849	-1.83805	P80188	Neutrophil gelatinase-associated lipocalin	+	0	-2.89742	P80188	Neutrophil gelatinase-associated lipocalin	+	0.0267606	-3.06772	P80188	Neutrophil gelatinase-associated lipocalin	+	0.00317647	-2.0905	P80188	Neutrophil gelatinase-associated lipocalin	+	0.021561	-2.27049	P80188	Neutrophil gelatinase-associated lipocalin		0.245256	-1.11834	P80188	Neutrophil gelatinase-associated lipocalin	+	0.00728571	-2.11734	P80188	Neutrophil gelatinase-associated lipocalin	+	0	-2.9436	P80188	Neutrophil gelatinase-associated lipocalin		0.109316	-0.938963	P80188	Neutrophil gelatinase-associated lipocalin	+	0	-2.87511
P01008	Antithrombin-III		0.0945098	-1.83631	P01008	Antithrombin-III	+	0.0031	-2.2385	P01008	Antithrombin-III		0.281034	-2.17543	P01008	Antithrombin-III		0.189982	-1.98057	P01008	Antithrombin-III		0.147059	-1.74724	P01008	Antithrombin-III		0.888353	0.589524	P01008	Antithrombin-III		0.105224	-0.856485	P01008	Antithrombin-III	+	0.00353846	-2.18516	P01008	Antithrombin-III	+	0.0467619	-1.33331	P01008	Antithrombin-III	+	0.00213333	-2.29073
P04004	Vitronectin	+	0	-3.31265	P04004	Vitronectin	+	0	-3.45506	P04004	Vitronectin	+	0.014	-3.84564	P04004	Vitronectin	+	0	-2.69878	P04004	Vitronectin	+	0	-2.73616	P04004	Vitronectin	+	0	-2.29882	P04004	Vitronectin	+	0	-2.79614	P04004	Vitronectin	+	0.00438095	-2.76875	P04004	Vitronectin	+	0	-1.80579	P04004	Vitronectin	+	0	-3.4619
P02774	Vitamin D-binding protein	+	0.0153469	-6.41313	P02774	Vitamin D-binding protein	+	0.00288372	-5.68651	P02774	Vitamin D-binding protein	+	0.00785714	-6.57825	P02774	Vitamin D-binding protein	+	0.00348387	-4.73743	P02774	Vitamin D-binding protein	+	0.0174444	-4.77001	P02774	Vitamin D-binding protein		0.0684878	-3.94606	P02774	Vitamin D-binding protein	+	0.00645455	-5.07199	P02774	Vitamin D-binding protein	+	0.00714286	-4.83714	P02774	Vitamin D-binding protein	+	0.05696	-4.14242	P02774	Vitamin D-binding protein	+	0	-5.78901
P08123	Collagen alpha-2(I) chain	+	0	-3.41211	P08123	Collagen alpha-2(I) chain	+	0	-1.58598	P08123	Collagen alpha-2(I) chain	+	0.0125333	-3.71413	P08123	Collagen alpha-2(I) chain	+	0	-2.66912	P08123	Collagen alpha-2(I) chain	+	0	-2.71651	P08123	Collagen alpha-2(I) chain	+	0.044	-3.1988	P08123	Collagen alpha-2(I) chain	+	0.0067619	-2.76781	P08123	Collagen alpha-2(I) chain	+	0	2.36893	P08123	Collagen alpha-2(I) chain	+	0.0464348	-1.31323	P08123	Collagen alpha-2(I) chain	+	0	-3.17611
P01591	Immunoglobulin J chain		0.194172	-0.318836	P01591	Immunoglobulin J chain	+	0.0117143	-2.68807	P01591	Immunoglobulin J chain	+	0.011	-2.92951	P01591	Immunoglobulin J chain	+	0.0158333	-1.92865	P01591	Immunoglobulin J chain	+	0.0464	-2.37004	P01591	Immunoglobulin J chain		0.55569	0.227502	P01591	Immunoglobulin J chain		0.206938	-1.75777	P01591	Immunoglobulin J chain	+	0.00981818	-2.70497	P01591	Immunoglobulin J chain		0.224971	-0.969818	P01591	Immunoglobulin J chain	+	0.00349206	-2.28616
P23280	Carbonic anhydrase 6		0.43	0.472058	P23280	Carbonic anhydrase 6		0.126982	-2.75196	P23280	Carbonic anhydrase 6		0.626785	1.68298	P23280	Carbonic anhydrase 6		0.814435	1.47518	P23280	Carbonic anhydrase 6		0.466393	1.00187	P23280	Carbonic anhydrase 6		0.462	-2.37592	P23280	Carbonic anhydrase 6		0.204324	-3.32227	P23280	Carbonic anhydrase 6		0.539736	1.8376	P23280	Carbonic anhydrase 6		0.89713	2.29397	P23280	Carbonic anhydrase 6		0.843568	1.1561
P52209	6-phosphogluconate dehydrogenase, decarboxylating	+	0.0156667	-1.77475	P52209	6-phosphogluconate dehydrogenase, decarboxylating	+	0.00317949	-2.47788	P52209	6-phosphogluconate dehydrogenase, decarboxylating	+	0.0110588	-3.07214	P52209	6-phosphogluconate dehydrogenase, decarboxylating		0.0513171	-1.28423	P52209	6-phosphogluconate dehydrogenase, decarboxylating		0.0581765	-1.04069	P52209	6-phosphogluconate dehydrogenase, decarboxylating		0.158914	-2.2177	P52209	6-phosphogluconate dehydrogenase, decarboxylating		0.0768791	-1.63773	P52209	6-phosphogluconate dehydrogenase, decarboxylating		0.0795556	-3.59062	P52209	6-phosphogluconate dehydrogenase, decarboxylating		0.100444	-1.64105	P52209	6-phosphogluconate dehydrogenase, decarboxylating		0.0648148	-2.03893
P04114	Apolipoprotein B-100	+	0.0126667	-2.42213	P04114	Apolipoprotein B-100	+	0.0115493	-3.19537	P04114	Apolipoprotein B-100	+	0.0155	-3.37704	P04114	Apolipoprotein B-100		0.0585116	-2.02541	P04114	Apolipoprotein B-100	+	0.0165263	-2.35759	P04114	Apolipoprotein B-100		0.114519	-2.299	P04114	Apolipoprotein B-100	+	0.00648276	-1.93522	P04114	Apolipoprotein B-100	+	0	-3.06361	P04114	Apolipoprotein B-100	+	0.0455294	-2.15058	P04114	Apolipoprotein B-100	+	0	-3.53918
P02452	Collagen alpha-1(I) chain	+	0	-3.10201	P02452	Collagen alpha-1(I) chain		0.837719	-0.33872	P02452	Collagen alpha-1(I) chain	+	0.0110968	-3.31385	P02452	Collagen alpha-1(I) chain	+	0.0036	-1.98917	P02452	Collagen alpha-1(I) chain	+	0	-2.38107	P02452	Collagen alpha-1(I) chain	+	0	-2.38097	P02452	Collagen alpha-1(I) chain	+	0	-3.19607	P02452	Collagen alpha-1(I) chain	+	0	3.50762	P02452	Collagen alpha-1(I) chain		0.647661	-0.0292511	P02452	Collagen alpha-1(I) chain	+	0	-2.45586
P02533	Keratin, type I cytoskeletal 14	+	0.0223614	-3.11925	P02533	Keratin, type I cytoskeletal 14		0.753761	-0.427136	P02533	Keratin, type I cytoskeletal 14		0.522781	-4.65072	P02533	Keratin, type I cytoskeletal 14		0.4356	-3.12364	P02533	Keratin, type I cytoskeletal 14	+	0.0325957	-4.0499	P02533	Keratin, type I cytoskeletal 14		0.114929	-2.31123	P02533	Keratin, type I cytoskeletal 14		0.0862268	-2.53144	P02533	Keratin, type I cytoskeletal 14		0.732702	-0.370369	P02533	Keratin, type I cytoskeletal 14		0.928928	1.84712	P02533	Keratin, type I cytoskeletal 14		0.357333	-3.42893
Q8TAX7	Mucin-7	+	0.0151795	-4.32307	Q8TAX7	Mucin-7	+	0	-3.71776	Q8TAX7	Mucin-7	+	0.0137544	-4.46846	Q8TAX7	Mucin-7	+	0.0138182	-2.6504	Q8TAX7	Mucin-7	+	0.0205581	-1.91477	Q8TAX7	Mucin-7	+	0.0449474	-1.77471	Q8TAX7	Mucin-7	+	0.04875	-2.77165	Q8TAX7	Mucin-7	+	0	-3.42944	Q8TAX7	Mucin-7	+	0	-3.69757	Q8TAX7	Mucin-7	+	0	-4.50946
P02671	Fibrinogen alpha chain		0.158912	-1.5163	P02671	Fibrinogen alpha chain	+	0.0163544	2.00374	P02671	Fibrinogen alpha chain		0.142227	-1.29163	P02671	Fibrinogen alpha chain		0.105551	-0.8476	P02671	Fibrinogen alpha chain		0.810286	0.282438	P02671	Fibrinogen alpha chain		0.734853	0.42238	P02671	Fibrinogen alpha chain	+	0.0316111	-0.961046	P02671	Fibrinogen alpha chain	+	0.0268276	-0.841097	P02671	Fibrinogen alpha chain	+	0.048	1.53459	P02671	Fibrinogen alpha chain		0.118124	-0.319607
P00558	Phosphoglycerate kinase 1		0.0855758	-1.66981	P00558	Phosphoglycerate kinase 1	+	0.0155663	-2.34452	P00558	Phosphoglycerate kinase 1	+	0.0135172	-3.28323	P00558	Phosphoglycerate kinase 1		0.066	-1.56512	P00558	Phosphoglycerate kinase 1		0.0790256	-1.29347	P00558	Phosphoglycerate kinase 1		0.0952	-1.39392	P00558	Phosphoglycerate kinase 1	+	0.049679	-2.93977	P00558	Phosphoglycerate kinase 1		0.264935	-0.332257	P00558	Phosphoglycerate kinase 1		0.102027	-1.60168	P00558	Phosphoglycerate kinase 1	+	0.0239535	-1.31873
O75594	Peptidoglycan recognition protein 1		0.306459	0.196367	O75594	Peptidoglycan recognition protein 1		0.129009	-1.01359	O75594	Peptidoglycan recognition protein 1		0.167152	2.07053	O75594	Peptidoglycan recognition protein 1		0.204708	0.419943	O75594	Peptidoglycan recognition protein 1		0.886949	-0.235913	O75594	Peptidoglycan recognition protein 1	+	0.0205	4.73945	O75594	Peptidoglycan recognition protein 1	+	0.0102295	2.313	O75594	Peptidoglycan recognition protein 1		0.168784	0.815216	O75594	Peptidoglycan recognition protein 1	+	0.048375	5.00566	O75594	Peptidoglycan recognition protein 1	+	0.0245238	4.17354
P62805	Histone H4	+	0.0156	-1.98664	P62805	Histone H4	+	0.0152	-3.42673	P62805	Histone H4	+	0.0161333	-2.28129	P62805	Histone H4	+	0	-2.13662	P62805	Histone H4	+	0.0476825	-1.0318	P62805	Histone H4		0.267838	-2.28151	P62805	Histone H4		0.0683146	-1.1231	P62805	Histone H4	+	0.023234	1.02405	P62805	Histone H4	+	0.0508571	-1.54644	P62805	Histone H4	+	0.0227654	-0.671766
Q6P5S2	Protein LEG1 homolog	+	0.0153766	-2.35538	Q6P5S2	Protein LEG1 homolog		0.0765714	-1.27773	Q6P5S2	Protein LEG1 homolog		0.611758	-1.15677	Q6P5S2	Protein LEG1 homolog		0.0990515	-1.68095	Q6P5S2	Protein LEG1 homolog		0.375931	0.538933	Q6P5S2	Protein LEG1 homolog		0.27304	0.40182	Q6P5S2	Protein LEG1 homolog		0.252862	-1.14156	Q6P5S2	Protein LEG1 homolog	+	0.00368	-3.00987	Q6P5S2	Protein LEG1 homolog		0.911821	-0.496099	Q6P5S2	Protein LEG1 homolog		0.353152	-0.390613
P02042	Hemoglobin subunit delta	+	0.0156364	-1.6832	P02042	Hemoglobin subunit delta	+	0	-2.66234	P02042	Hemoglobin subunit delta	+	0.0131163	-1.63961	P02042	Hemoglobin subunit delta	+	0.0135319	-1.44955	P02042	Hemoglobin subunit delta	+	0.0355862	-2.1728	P02042	Hemoglobin subunit delta		0.0951373	-1.47858	P02042	Hemoglobin subunit delta	+	0.00569697	-1.96893	P02042	Hemoglobin subunit delta	+	0	-1.76987	P02042	Hemoglobin subunit delta		0.110481	-0.657748	P02042	Hemoglobin subunit delta	+	0.00366667	-2.57328
P02766	Transthyretin	+	0	-5.33727	P02766	Transthyretin	+	0	-4.00727	P02766	Transthyretin		0.116645	-1.433	P02766	Transthyretin		0.279471	-0.328355	P02766	Transthyretin	+	0.00729412	-3.41346	P02766	Transthyretin	+	0	-3.81142	P02766	Transthyretin	+	0.00556863	-3.00535	P02766	Transthyretin	+	0.0455652	-2.31908	P02766	Transthyretin		0.545162	0.75203	P02766	Transthyretin	+	0.00455556	-2.41381
P62937	Peptidyl-prolyl cis-trans isomerase A	+	0.0163478	-2.33168	P62937	Peptidyl-prolyl cis-trans isomerase A	+	0	-3.00585	P62937	Peptidyl-prolyl cis-trans isomerase A	+	0.00496	-2.88747	P62937	Peptidyl-prolyl cis-trans isomerase A	+	0.0249836	-2.81935	P62937	Peptidyl-prolyl cis-trans isomerase A	+	0.0222727	-2.16894	P62937	Peptidyl-prolyl cis-trans isomerase A	+	0.0198182	-1.86374	P62937	Peptidyl-prolyl cis-trans isomerase A	+	0	-2.49405	P62937	Peptidyl-prolyl cis-trans isomerase A		0.529288	-0.756207	P62937	Peptidyl-prolyl cis-trans isomerase A		0.0797059	-2.13471	P62937	Peptidyl-prolyl cis-trans isomerase A	+	0	-2.63091
P02765	Alpha-2-HS-glycoprotein	+	0	-4.20684	P02765	Alpha-2-HS-glycoprotein	+	0	-5.65157	P02765	Alpha-2-HS-glycoprotein	+	0.0177143	-5.95019	P02765	Alpha-2-HS-glycoprotein	+	0	-3.46795	P02765	Alpha-2-HS-glycoprotein	+	0	-4.54294	P02765	Alpha-2-HS-glycoprotein	+	0.0192941	-1.8921	P02765	Alpha-2-HS-glycoprotein	+	0.00783333	-4.62845	P02765	Alpha-2-HS-glycoprotein	+	0	-2.96441	P02765	Alpha-2-HS-glycoprotein	+	0	-4.32374	P02765	Alpha-2-HS-glycoprotein	+	0	-4.64287
P09211	Glutathione S-transferase P	+	0.0153571	-2.6156	P09211	Glutathione S-transferase P	+	0.0155918	-1.49861	P09211	Glutathione S-transferase P		0.626955	0.749683	P09211	Glutathione S-transferase P		0.428961	-0.195606	P09211	Glutathione S-transferase P		0.187304	-1.37112	P09211	Glutathione S-transferase P		0.159652	-1.13938	P09211	Glutathione S-transferase P		0.539659	-1.51902	P09211	Glutathione S-transferase P		0.163435	-3.17801	P09211	Glutathione S-transferase P	+	0.0428235	-2.2657	P09211	Glutathione S-transferase P		0.2327	-3.28096
P02743	Serum amyloid P-component	+	0	-2.4823	P02743	Serum amyloid P-component	+	0.00295238	-2.9252	P02743	Serum amyloid P-component	+	0.0248	-1.75947	P02743	Serum amyloid P-component	+	0.0135714	-2.12612	P02743	Serum amyloid P-component		0.284444	-2.23566	P02743	Serum amyloid P-component	+	0.0252308	-1.96392	P02743	Serum amyloid P-component	+	0	-2.0659	P02743	Serum amyloid P-component		0.0761013	-1.34478	P02743	Serum amyloid P-component	+	0.02625	-1.47431	P02743	Serum amyloid P-component	+	0.0236782	-2.21239
P02763	Alpha-1-acid glycoprotein 1		0.121798	-3.56067	P02763	Alpha-1-acid glycoprotein 1		0.0706923	-3.31038	P02763	Alpha-1-acid glycoprotein 1		0.257487	-2.51863	P02763	Alpha-1-acid glycoprotein 1		0.0735824	-3.366	P02763	Alpha-1-acid glycoprotein 1		0.0678904	-2.97947	P02763	Alpha-1-acid glycoprotein 1		0.242667	-3.72074	P02763	Alpha-1-acid glycoprotein 1		0.117087	-2.50034	P02763	Alpha-1-acid glycoprotein 1		0.212615	-2.42505	P02763	Alpha-1-acid glycoprotein 1		0.909564	-0.584366	P02763	Alpha-1-acid glycoprotein 1		0.354452	-1.55804
P27105	Stomatin	+	0.0144706	-2.29458	P27105	Stomatin	+	0.0112329	-2.27544	P27105	Stomatin	+	0.0118919	-3.61312	P27105	Stomatin	+	0.0138261	-3.12128	P27105	Stomatin	+	0.0177333	-2.30892	P27105	Stomatin		0.156222	-1.5709	P27105	Stomatin		0.0648276	-1.5432	P27105	Stomatin		0.0900476	-3.73858	P27105	Stomatin		0.0795224	-1.51188	P27105	Stomatin		0.568896	0.653265
P07737	Profilin-1	+	0	-3.11981	P07737	Profilin-1	+	0.00248	-2.36273	P07737	Profilin-1	+	0.0108462	-2.65602	P07737	Profilin-1	+	0.00594872	-1.9843	P07737	Profilin-1	+	0.0157	-1.95149	P07737	Profilin-1	+	0.0229474	-2.05371	P07737	Profilin-1	+	0	-2.6454	P07737	Profilin-1	+	0.0219	-3.05636	P07737	Profilin-1	+	0.0125333	-3.15349	P07737	Profilin-1	+	0	-3.74929
P11142	Heat shock cognate 71 kDa protein	+	0.0220952	-3.72362	P11142	Heat shock cognate 71 kDa protein	+	0.01615	-3.83235	P11142	Heat shock cognate 71 kDa protein	+	0.0266133	-5.05118	P11142	Heat shock cognate 71 kDa protein		0.245436	-1.83189	P11142	Heat shock cognate 71 kDa protein	+	0.019	-2.39767	P11142	Heat shock cognate 71 kDa protein	+	0.0273333	-2.64017	P11142	Heat shock cognate 71 kDa protein	+	0.0205882	-4.38158	P11142	Heat shock cognate 71 kDa protein		0.0685128	-1.63751	P11142	Heat shock cognate 71 kDa protein		0.132182	-1.17422	P11142	Heat shock cognate 71 kDa protein	+	0	-4.18929
P13727	Bone marrow proteoglycan		0.357824	-1.91503	P13727	Bone marrow proteoglycan		0.293792	0.121721	P13727	Bone marrow proteoglycan		0.143708	-1.3112	P13727	Bone marrow proteoglycan		0.652448	-0.305081	P13727	Bone marrow proteoglycan	+	0	1.36071	P13727	Bone marrow proteoglycan		0.647008	0.216731	P13727	Bone marrow proteoglycan		0.27479	0.953106	P13727	Bone marrow proteoglycan		0.707225	0.759724	P13727	Bone marrow proteoglycan	+	0.0492632	1.32766	P13727	Bone marrow proteoglycan		0.90539	-0.555143
P01011	Alpha-1-antichymotrypsin	+	0.0329302	-3.81743	P01011	Alpha-1-antichymotrypsin	+	0.0157303	-3.67874	P01011	Alpha-1-antichymotrypsin		0.0952558	-2.93553	P01011	Alpha-1-antichymotrypsin	+	0.0245806	-3.94163	P01011	Alpha-1-antichymotrypsin		0.0641111	-3.09613	P01011	Alpha-1-antichymotrypsin		0.200289	-2.35652	P01011	Alpha-1-antichymotrypsin	+	0.0320563	-3.86103	P01011	Alpha-1-antichymotrypsin	+	0.0255082	-4.29059	P01011	Alpha-1-antichymotrypsin		0.168375	-2.92126	P01011	Alpha-1-antichymotrypsin	+	0.0233418	-4.56779
P10909	Clusterin	+	0.0348182	-1.21026	P10909	Clusterin	+	0	-2.66501	P10909	Clusterin		0.235009	-1.44631	P10909	Clusterin	+	0.0241905	-1.99201	P10909	Clusterin	+	0.0469032	-1.91465	P10909	Clusterin		0.313714	-0.965763	P10909	Clusterin		0.179551	-0.866078	P10909	Clusterin		0.472974	-0.431257	P10909	Clusterin		0.0639216	-1.62842	P10909	Clusterin	+	0	-2.90385
Q9HD89	Resistin		0.71757	1.27322	Q9HD89	Resistin	+	0.00709091	-1.87307	Q9HD89	Resistin		0.145221	5.01224	Q9HD89	Resistin	+	0	3.367	Q9HD89	Resistin	+	0.0312653	1.42326	Q9HD89	Resistin		0.340587	4.11841	Q9HD89	Resistin	+	0	2.91739	Q9HD89	Resistin		0.355221	1.27793	Q9HD89	Resistin		0.954187	-0.960237	Q9HD89	Resistin		0.55191	2.97783
P15153	Ras-related C3 botulinum toxin substrate 2	+	0.0150877	-2.45994	P15153	Ras-related C3 botulinum toxin substrate 2	+	0	-3.6709	P15153	Ras-related C3 botulinum toxin substrate 2	+	0.0104242	-3.47022	P15153	Ras-related C3 botulinum toxin substrate 2	+	0	-2.87677	P15153	Ras-related C3 botulinum toxin substrate 2	+	0.0210476	-2.08223	P15153	Ras-related C3 botulinum toxin substrate 2	+	0.0267143	-2.01906	P15153	Ras-related C3 botulinum toxin substrate 2	+	0.00723077	-3.22567	P15153	Ras-related C3 botulinum toxin substrate 2	+	0	-3.38476	P15153	Ras-related C3 botulinum toxin substrate 2	+	0.0479024	-2.72368	P15153	Ras-related C3 botulinum toxin substrate 2	+	0.00192	-2.50659
P25705	ATP synthase subunit alpha, mitochondrial	+	0.0165	-2.61679	P25705	ATP synthase subunit alpha, mitochondrial	+	0.0113889	-1.56814	P25705	ATP synthase subunit alpha, mitochondrial	+	0.0103333	-2.32624	P25705	ATP synthase subunit alpha, mitochondrial	+	0.0420556	-1.81552	P25705	ATP synthase subunit alpha, mitochondrial	+	0.0300392	-1.04907	P25705	ATP synthase subunit alpha, mitochondrial		0.19521	-2.09142	P25705	ATP synthase subunit alpha, mitochondrial	+	0	-2.1037	P25705	ATP synthase subunit alpha, mitochondrial		0.9616	0.779722	P25705	ATP synthase subunit alpha, mitochondrial		0.332772	-0.00396538	P25705	ATP synthase subunit alpha, mitochondrial	+	0	-2.11099
P31025	Lipocalin-1		0.09532	-5.18604	P31025	Lipocalin-1	+	0	-4.69273	P31025	Lipocalin-1		0.502508	-1.09895	P31025	Lipocalin-1	+	0.04368	-5.52903	P31025	Lipocalin-1		0.926957	-0.326143	P31025	Lipocalin-1		0.656889	0.127816	P31025	Lipocalin-1	+	0.036	-3.97392	P31025	Lipocalin-1		0.261132	-0.858591	P31025	Lipocalin-1		0.648773	1.41152	P31025	Lipocalin-1	+	0.0506392	-4.72255
P23528	Cofilin-1	+	0	-3.94286	P23528	Cofilin-1	+	0.0155556	-4.11548	P23528	Cofilin-1	+	0.00688889	-2.58297	P23528	Cofilin-1		0.0817021	-0.725776	P23528	Cofilin-1		0.21249	-0.47462	P23528	Cofilin-1	+	0.0282581	-1.87759	P23528	Cofilin-1	+	0	-2.71913	P23528	Cofilin-1		0.534367	-0.0321703	P23528	Cofilin-1		0.247057	-1.21807	P23528	Cofilin-1		0.190598	-0.699798
P49913	Cathelicidin antimicrobial peptide	+	0	-3.58847	P49913	Cathelicidin antimicrobial peptide	+	0	-2.39963	P49913	Cathelicidin antimicrobial peptide	+	0	-3.40287	P49913	Cathelicidin antimicrobial peptide	+	0	-3.58336	P49913	Cathelicidin antimicrobial peptide	+	0.0190303	-3.05737	P49913	Cathelicidin antimicrobial peptide	+	0.0242222	-1.47353	P49913	Cathelicidin antimicrobial peptide	+	0	-2.42552	P49913	Cathelicidin antimicrobial peptide	+	0.010125	-2.60148	P49913	Cathelicidin antimicrobial peptide	+	0	-2.4322	P49913	Cathelicidin antimicrobial peptide	+	0	-2.92268
P02652	Apolipoprotein A-II	+	0.0159259	-4.28629	P02652	Apolipoprotein A-II		0.129655	-2.06604	P02652	Apolipoprotein A-II		0.852259	-0.0789413	P02652	Apolipoprotein A-II		0.334848	-0.258692	P02652	Apolipoprotein A-II		0.165682	-0.782935	P02652	Apolipoprotein A-II		0.608533	0.588157	P02652	Apolipoprotein A-II	+	0.00546154	-3.45529	P02652	Apolipoprotein A-II		0.988511	0.146646	P02652	Apolipoprotein A-II		0.752444	0.192607	P02652	Apolipoprotein A-II	+	0	-3.11244
P05107	Integrin beta-2		0.326	-0.755811	P05107	Integrin beta-2		0.401385	-0.732907	P05107	Integrin beta-2		0.106427	-1.23977	P05107	Integrin beta-2		0.191107	-0.773231	P05107	Integrin beta-2		0.652469	-0.553926	P05107	Integrin beta-2		0.976142	-0.11869	P05107	Integrin beta-2		0.0608095	-1.33723	P05107	Integrin beta-2		0.213786	-1.18881	P05107	Integrin beta-2		0.115518	-1.11918	P05107	Integrin beta-2		0.13786	-1.38178
P40199	Carcinoembryonic antigen-related cell adhesion molecule 6	+	0	-2.82219	P40199	Carcinoembryonic antigen-related cell adhesion molecule 6	+	0.0162791	-3.42834	P40199	Carcinoembryonic antigen-related cell adhesion molecule 6	+	0.0129412	-2.72032	P40199	Carcinoembryonic antigen-related cell adhesion molecule 6		0.2495	1.67707	P40199	Carcinoembryonic antigen-related cell adhesion molecule 6	+	0.0115789	-2.34028	P40199	Carcinoembryonic antigen-related cell adhesion molecule 6	+	0	-3.67298	P40199	Carcinoembryonic antigen-related cell adhesion molecule 6	+	0.011873	-3.16626	P40199	Carcinoembryonic antigen-related cell adhesion molecule 6	+	0	-3.32805	P40199	Carcinoembryonic antigen-related cell adhesion molecule 6	+	0	-3.50589	P40199	Carcinoembryonic antigen-related cell adhesion molecule 6	+	0	-3.12979
P08729	Keratin, type II cytoskeletal 7	+	0.0143333	-2.35238	P08729	Keratin, type II cytoskeletal 7	+	0.00243137	-3.48651	P08729	Keratin, type II cytoskeletal 7		0.105244	-2.36822	P08729	Keratin, type II cytoskeletal 7	+	0	-2.80099	P08729	Keratin, type II cytoskeletal 7		0.0534375	-2.30557	P08729	Keratin, type II cytoskeletal 7	+	0	-2.56551	P08729	Keratin, type II cytoskeletal 7	+	0.0455385	-1.87758	P08729	Keratin, type II cytoskeletal 7	+	0.0224615	-2.02022	P08729	Keratin, type II cytoskeletal 7		0.123482	-1.61881	P08729	Keratin, type II cytoskeletal 7	+	0	-2.65794
P15515	Histatin-1	+	0.0160976	-2.12493	P15515	Histatin-1		0.249398	-0.00134277	P15515	Histatin-1		0.07145	-2.2366	P15515	Histatin-1		0.645835	0.108347	P15515	Histatin-1		0.665271	0.856273	P15515	Histatin-1		0.62076	-0.10274	P15515	Histatin-1	+	0.0437895	-1.68469	P15515	Histatin-1	+	0.0469296	-1.55792	P15515	Histatin-1		0.111897	-0.510365	P15515	Histatin-1	+	0.0263111	-0.981816
P31949	Protein S100-A11		0.0624898	-2.29117	P31949	Protein S100-A11		0.292476	0.241123	P31949	Protein S100-A11	+	0.00758621	-2.26051	P31949	Protein S100-A11		0.214852	-0.805013	P31949	Protein S100-A11		0.349487	-0.203168	P31949	Protein S100-A11		0.186329	-2.59423	P31949	Protein S100-A11		0.18637	-1.67764	P31949	Protein S100-A11		0.265101	-1.20358	P31949	Protein S100-A11		0.104703	-3.68829	P31949	Protein S100-A11		0.0573204	-3.38741
P10599	Thioredoxin		0.119	-1.43912	P10599	Thioredoxin		0.263226	-2.21657	P10599	Thioredoxin		0.216481	-1.74367	P10599	Thioredoxin	+	0.0146154	-3.2758	P10599	Thioredoxin	+	0.030717	-2.35927	P10599	Thioredoxin		0.136516	-2.29143	P10599	Thioredoxin		0.186679	-4.3167	P10599	Thioredoxin	+	0	-3.52903	P10599	Thioredoxin		0.905529	-1.6815	P10599	Thioredoxin	+	0.0496162	-4.39642
P08493	Matrix Gla protein	+	0.0148276	-2.40639	P08493	Matrix Gla protein		0.1539	0.792972	P08493	Matrix Gla protein	+	0.0237015	-2.7813	P08493	Matrix Gla protein		0.884748	0.957081	P08493	Matrix Gla protein		0.161425	-0.709724	P08493	Matrix Gla protein		0.245451	-0.30082	P08493	Matrix Gla protein	+	0.00579592	-2.35715	P08493	Matrix Gla protein	+	0.0263729	-2.64613	P08493	Matrix Gla protein		0.100507	-0.79262	P08493	Matrix Gla protein	+	0	-2.77512
P00751	Complement factor B	+	0.0157143	-3.65023	P00751	Complement factor B	+	0.0151169	-4.07825	P00751	Complement factor B	+	0.0112727	-4.51412	P00751	Complement factor B	+	0.0204746	-2.73748	P00751	Complement factor B	+	0.01632	-3.03153	P00751	Complement factor B	+	0.01744	-2.47621	P00751	Complement factor B	+	0.0153125	-3.04498	P00751	Complement factor B	+	0	-3.96799	P00751	Complement factor B	+	0.0442286	-3.38663	P00751	Complement factor B	+	0	-3.983
P01860	Immunoglobulin heavy constant gamma 3		0.101192	-0.59318	P01860	Immunoglobulin heavy constant gamma 3	+	0.00238462	-2.94794	P01860	Immunoglobulin heavy constant gamma 3	+	0.01128	-2.35191	P01860	Immunoglobulin heavy constant gamma 3	+	0.0268308	-1.51264	P01860	Immunoglobulin heavy constant gamma 3		0.166578	-2.11536	P01860	Immunoglobulin heavy constant gamma 3		0.16272	-1.08826	P01860	Immunoglobulin heavy constant gamma 3		0.20475	1.61043	P01860	Immunoglobulin heavy constant gamma 3		0.20912	-0.76083	P01860	Immunoglobulin heavy constant gamma 3		0.911319	1.49428	P01860	Immunoglobulin heavy constant gamma 3		0.101571	-1.03731
P05090	Apolipoprotein D		0.429984	-0.814328	P05090	Apolipoprotein D	+	0.03184	-2.77718	P05090	Apolipoprotein D		0.33479	-1.30807	P05090	Apolipoprotein D		0.439176	-1.1913	P05090	Apolipoprotein D		0.162047	-1.918	P05090	Apolipoprotein D		0.323667	-1.62689	P05090	Apolipoprotein D		0.198436	-1.32342	P05090	Apolipoprotein D		0.12382	-3.77142	P05090	Apolipoprotein D		0.246462	-2.06957	P05090	Apolipoprotein D		0.250852	-1.56271
P01033	Metalloproteinase inhibitor 1	+	0.0142609	-2.14878	P01033	Metalloproteinase inhibitor 1		0.306614	-0.330339	P01033	Metalloproteinase inhibitor 1		0.102023	-1.39698	P01033	Metalloproteinase inhibitor 1		0.104485	-1.46633	P01033	Metalloproteinase inhibitor 1		0.287103	-1.0844	P01033	Metalloproteinase inhibitor 1		0.158706	-0.953958	P01033	Metalloproteinase inhibitor 1		0.068	-1.6897	P01033	Metalloproteinase inhibitor 1	+	0.00689655	-2.71057	P01033	Metalloproteinase inhibitor 1		0.065283	-2.11119	P01033	Metalloproteinase inhibitor 1	+	0	-2.64463
P0DOX8	Immunoglobulin lambda-1 light chain	+	0	-4.20045	P0DOX8	Immunoglobulin lambda-1 light chain	+	0.00233962	-4.55159	P0DOX8	Immunoglobulin lambda-1 light chain	+	0	-5.80201	P0DOX8	Immunoglobulin lambda-1 light chain	+	0	-5.61074	P0DOX8	Immunoglobulin lambda-1 light chain	+	0.0184706	-4.10211	P0DOX8	Immunoglobulin lambda-1 light chain	+	0	-3.23692	P0DOX8	Immunoglobulin lambda-1 light chain	+	0	-5.45403	P0DOX8	Immunoglobulin lambda-1 light chain	+	0.012	-6.34515	P0DOX8	Immunoglobulin lambda-1 light chain	+	0	-3.49966	P0DOX8	Immunoglobulin lambda-1 light chain	+	0	-6.95958
P01619	Immunoglobulin kappa variable 3-20	+	0.0201481	-3.05066	P01619	Immunoglobulin kappa variable 3-20	+	0.00420339	-2.84537	P01619	Immunoglobulin kappa variable 3-20	+	0.0262029	-1.87724	P01619	Immunoglobulin kappa variable 3-20	+	0.0295152	-1.91185	P01619	Immunoglobulin kappa variable 3-20	+	0.019625	-3.34122	P01619	Immunoglobulin kappa variable 3-20		0.511221	-0.0925055	P01619	Immunoglobulin kappa variable 3-20	+	0.00525926	-3.0824	P01619	Immunoglobulin kappa variable 3-20	+	0.0116667	-2.62043	P01619	Immunoglobulin kappa variable 3-20		0.0631724	-1.56172	P01619	Immunoglobulin kappa variable 3-20	+	0.0120526	-2.84922
P41218	Myeloid cell nuclear differentiation antigen	+	0.0151667	-1.87534	P41218	Myeloid cell nuclear differentiation antigen	+	0	-2.29833	P41218	Myeloid cell nuclear differentiation antigen		0.212453	-1.02137	P41218	Myeloid cell nuclear differentiation antigen	+	0.0414795	0.630432	P41218	Myeloid cell nuclear differentiation antigen	+	0.016973	-1.08673	P41218	Myeloid cell nuclear differentiation antigen		0.240989	-1.70902	P41218	Myeloid cell nuclear differentiation antigen		0.711597	-0.410119	P41218	Myeloid cell nuclear differentiation antigen	+	0.004	-2.39921	P41218	Myeloid cell nuclear differentiation antigen		0.0904928	-0.933452	P41218	Myeloid cell nuclear differentiation antigen	+	0.00208696	-1.49399
P07996	Thrombospondin-1	+	0.0134118	-4.07317	P07996	Thrombospondin-1		0.464485	-0.0917912	P07996	Thrombospondin-1	+	0.012	-2.9216	P07996	Thrombospondin-1	+	0.02725	-2.38165	P07996	Thrombospondin-1		0.0951605	-1.89682	P07996	Thrombospondin-1		0.0829167	-1.81858	P07996	Thrombospondin-1	+	0.0212121	-1.8836	P07996	Thrombospondin-1	+	0.0492778	-1.66722	P07996	Thrombospondin-1		0.0625965	-1.83516	P07996	Thrombospondin-1		0.0914234	-2.08625
P23284	Peptidyl-prolyl cis-trans isomerase B		0.261067	-4.11734	P23284	Peptidyl-prolyl cis-trans isomerase B	+	0.0153846	-5.23563	P23284	Peptidyl-prolyl cis-trans isomerase B		0.206641	-3.28367	P23284	Peptidyl-prolyl cis-trans isomerase B		0.239828	-2.78466	P23284	Peptidyl-prolyl cis-trans isomerase B		0.256505	-3.82861	P23284	Peptidyl-prolyl cis-trans isomerase B		0.590598	0.675427	P23284	Peptidyl-prolyl cis-trans isomerase B		0.678307	-0.14135	P23284	Peptidyl-prolyl cis-trans isomerase B		0.859912	-0.85818	P23284	Peptidyl-prolyl cis-trans isomerase B		0.972229	0.464751	P23284	Peptidyl-prolyl cis-trans isomerase B		0.380504	-0.863212
P25815	Protein S100-P		0.101448	-2.47529	P25815	Protein S100-P	+	0.00413333	-3.71072	P25815	Protein S100-P		0.326576	-0.466375	P25815	Protein S100-P		0.189418	-3.41913	P25815	Protein S100-P		0.4122	1.60234	P25815	Protein S100-P		0.906486	2.09254	P25815	Protein S100-P		0.304813	2.18674	P25815	Protein S100-P		0.107954	-3.94335	P25815	Protein S100-P		0.0643265	-2.73764	P25815	Protein S100-P		0.189763	-4.22246
P06870	Kallikrein-1		0.188174	-0.30984	P06870	Kallikrein-1		0.0591456	-0.986391	P06870	Kallikrein-1		0.48944	-0.733511	P06870	Kallikrein-1	+	0.0448205	-1.10112	P06870	Kallikrein-1		0.110683	-1.74224	P06870	Kallikrein-1		0.18515	-0.879059	P06870	Kallikrein-1		0.364444	-0.318692	P06870	Kallikrein-1	+	0.0368235	-2.0644	P06870	Kallikrein-1		0.267964	2.18712	P06870	Kallikrein-1	+	0.0501224	-1.00827
P10153	Non-secretory ribonuclease		0.818657	0.0975914	P10153	Non-secretory ribonuclease	+	0.01552	-2.05549	P10153	Non-secretory ribonuclease		0.431902	-0.542002	P10153	Non-secretory ribonuclease		0.787562	-0.142262	P10153	Non-secretory ribonuclease		0.130095	1.56966	P10153	Non-secretory ribonuclease		0.789038	0.436036	P10153	Non-secretory ribonuclease		0.646193	2.21201	P10153	Non-secretory ribonuclease		0.915194	1.1925	P10153	Non-secretory ribonuclease		0.867908	1.68386	P10153	Non-secretory ribonuclease		0.410187	0.280446
P05546	Heparin cofactor 2	+	0.0169231	-3.90347	P05546	Heparin cofactor 2	+	0.004	-2.04363	P05546	Heparin cofactor 2		0.397115	-2.59408	P05546	Heparin cofactor 2	+	0	-4.00938	P05546	Heparin cofactor 2		0.23484	-1.43934	P05546	Heparin cofactor 2		0.645268	-0.0566969	P05546	Heparin cofactor 2		0.534062	-0.190003	P05546	Heparin cofactor 2	+	0.0263273	-3.81881	P05546	Heparin cofactor 2		0.0707541	-1.87843	P05546	Heparin cofactor 2		0.167483	-2.51798
O00299	Chloride intracellular channel protein 1		0.459758	-1.63435	O00299	Chloride intracellular channel protein 1	+	0.0157526	-1.9958	O00299	Chloride intracellular channel protein 1	+	0.0273425	-1.90813	O00299	Chloride intracellular channel protein 1		0.983574	0.0458965	O00299	Chloride intracellular channel protein 1		0.0710933	-1.25671	O00299	Chloride intracellular channel protein 1		0.894245	-1.05655	O00299	Chloride intracellular channel protein 1		0.0762581	-1.40125	O00299	Chloride intracellular channel protein 1		0.163333	-0.936811	O00299	Chloride intracellular channel protein 1		0.0975429	-2.49811	O00299	Chloride intracellular channel protein 1	+	0.00218182	-3.10714
P06331	Immunoglobulin heavy variable 4-34		0.125607	-0.331421	P06331	Immunoglobulin heavy variable 4-34	+	0.00876471	-2.54753	P06331	Immunoglobulin heavy variable 4-34		0.110739	-1.07669	P06331	Immunoglobulin heavy variable 4-34		0.0724494	-1.20775	P06331	Immunoglobulin heavy variable 4-34		0.172879	-0.921002	P06331	Immunoglobulin heavy variable 4-34		0.871403	-0.316524	P06331	Immunoglobulin heavy variable 4-34	+	0.00660465	-1.4681	P06331	Immunoglobulin heavy variable 4-34	+	0	-1.80113	P06331	Immunoglobulin heavy variable 4-34		0.730602	0.366403	P06331	Immunoglobulin heavy variable 4-34		0.0571429	-1.79726
P08758	Annexin A5	+	0.0145763	-4.09511	P08758	Annexin A5	+	0	-4.52559	P08758	Annexin A5	+	0.0128182	-4.30606	P08758	Annexin A5	+	0.00284211	-4.79461	P08758	Annexin A5	+	0.0183448	-3.0105	P08758	Annexin A5		0.116621	-3.09402	P08758	Annexin A5	+	0.00752	-4.2287	P08758	Annexin A5	+	0	-5.19067	P08758	Annexin A5	+	0.0429091	-3.53648	P08758	Annexin A5	+	0	-5.34266
P28799	Progranulin	+	0.019038	-3.51001	P28799	Progranulin	+	0.0166087	-2.78833	P28799	Progranulin	+	0.0122609	-4.19394	P28799	Progranulin	+	0.0443684	-4.1773	P28799	Progranulin	+	0.0161026	-3.86961	P28799	Progranulin		0.149477	-2.14958	P28799	Progranulin	+	0.0208955	-3.22613	P28799	Progranulin	+	0.0273208	-3.31914	P28799	Progranulin		0.0637143	-3.08579	P28799	Progranulin	+	0.00360656	-4.2957
P59666	Neutrophil defensin 3		0.11428	2.29273	P59666	Neutrophil defensin 3		0.117929	1.79815	P59666	Neutrophil defensin 3		0.3483	2.31371	P59666	Neutrophil defensin 3		0.0716444	1.39916	P59666	Neutrophil defensin 3		0.411193	1.60677	P59666	Neutrophil defensin 3		0.123672	1.91624	P59666	Neutrophil defensin 3		0.272068	0.333326	P59666	Neutrophil defensin 3		0.643406	-0.765064	P59666	Neutrophil defensin 3		0.193505	-0.567067	P59666	Neutrophil defensin 3		0.844114	0.048295
P02461	Collagen alpha-1(III) chain	+	0.0149589	-3.97405	P02461	Collagen alpha-1(III) chain	+	0	-3.86634	P02461	Collagen alpha-1(III) chain	+	0.0062	-3.89177	P02461	Collagen alpha-1(III) chain	+	0	-2.64961	P02461	Collagen alpha-1(III) chain	+	0.0137391	-3.19774	P02461	Collagen alpha-1(III) chain	+	0	-2.71026	P02461	Collagen alpha-1(III) chain	+	0	-3.6448	P02461	Collagen alpha-1(III) chain	+	0.0277857	1.28528	P02461	Collagen alpha-1(III) chain		0.123476	-2.33674	P02461	Collagen alpha-1(III) chain	+	0	-3.84457
P81605	Dermcidin	+	0	-1.54123	P81605	Dermcidin	+	0.00217544	-2.91116	P81605	Dermcidin	+	0.00729412	-4.96821	P81605	Dermcidin	+	0.035942	-1.59529	P81605	Dermcidin	+	0.0321481	-3.58057	P81605	Dermcidin		0.160986	-2.85934	P81605	Dermcidin	+	0	-4.11646	P81605	Dermcidin		0.0881446	-2.40285	P81605	Dermcidin	+	0.0469091	-1.01606	P81605	Dermcidin	+	0	-2.66082
P14174	Macrophage migration inhibitory factor		0.934417	1.03453	P14174	Macrophage migration inhibitory factor	+	0	-3.37885	P14174	Macrophage migration inhibitory factor		0.290838	-1.65489	P14174	Macrophage migration inhibitory factor	+	0	2.23119	P14174	Macrophage migration inhibitory factor		0.750667	2.8152	P14174	Macrophage migration inhibitory factor		0.554678	-2.88055	P14174	Macrophage migration inhibitory factor		0.641441	2.35548	P14174	Macrophage migration inhibitory factor	+	0.0230526	1.82877	P14174	Macrophage migration inhibitory factor	+	0.041	2.72778	P14174	Macrophage migration inhibitory factor	+	0.0034375	-3.3221
P02760	Protein AMBP	+	0.0036	-3.98184	P02760	Protein AMBP	+	0	-3.21954	P02760	Protein AMBP	+	0.0233529	-3.74721	P02760	Protein AMBP	+	0	-2.47914	P02760	Protein AMBP	+	0.0150476	-1.98323	P02760	Protein AMBP		0.0535	-1.46228	P02760	Protein AMBP	+	0	-4.09992	P02760	Protein AMBP	+	0	-3.03014	P02760	Protein AMBP		0.064766	-2.97149	P02760	Protein AMBP	+	0	-3.09943
P43490	Nicotinamide phosphoribosyltransferase		0.121441	-2.34664	P43490	Nicotinamide phosphoribosyltransferase		0.131119	-0.883042	P43490	Nicotinamide phosphoribosyltransferase		0.255165	-2.13523	P43490	Nicotinamide phosphoribosyltransferase		0.306504	-1.76872	P43490	Nicotinamide phosphoribosyltransferase		0.895941	2.11794	P43490	Nicotinamide phosphoribosyltransferase		0.610169	2.24011	P43490	Nicotinamide phosphoribosyltransferase		0.445984	-0.0148983	P43490	Nicotinamide phosphoribosyltransferase		0.267556	-0.427179	P43490	Nicotinamide phosphoribosyltransferase		0.169918	-1.59437	P43490	Nicotinamide phosphoribosyltransferase		0.371683	0.644346
P26641	Elongation factor 1-gamma	+	0.015619	-4.92162	P26641	Elongation factor 1-gamma		0.843387	0.996482	P26641	Elongation factor 1-gamma		0.0891084	-3.06018	P26641	Elongation factor 1-gamma		0.10468	-5.33168	P26641	Elongation factor 1-gamma		0.288	-2.7743	P26641	Elongation factor 1-gamma		0.112912	-3.50387	P26641	Elongation factor 1-gamma		0.558656	0.0430202	P26641	Elongation factor 1-gamma		0.125227	-4.67211	P26641	Elongation factor 1-gamma		0.250393	-3.88194	P26641	Elongation factor 1-gamma		0.0662385	-4.38591
[truncated: 35 more columns]
